# Supplementary material for: One-pot synthesis of functionalized dihydropyridin-2-ones via carbene-catalyzed base-controlled [3+3] annulation reaction
Source: Royal Society of Chemistry journal article supplement (doi:10.1039/d4cc03521f), 2024-01-01
Supplement: d4cc03521f1.pdf [file d4cc03521f1.pdf]

## ***Supporting Information***

One-pot synthesis of functionalized dihydropyridin-2-ones via carbene-catalyzed base-controlled [3+3] annulation reaction

Zhan-Yong Wang,<sup>a</sup> Guoyang Ma,<sup>b</sup> Yaoyao Xu,<sup>a</sup> Qingqing Wang,<sup>a</sup> Mengru Zhang,<sup>a</sup>  
Xueji Ma,<sup>a</sup> Chenyang Ma,<sup>c</sup> Aili Sun,<sup>d</sup> Ran Xia<sup>\*a</sup> and Hongxin Liu<sup>\*e,f</sup>

<sup>a</sup>*School of Pharmacy, Xinxiang University, Xinxiang 453003, China*

<sup>b</sup>*School of Chemistry and Materials Engineering, Xinxiang University, Xinxiang 453003, China*

<sup>c</sup>*Henan Run Catalysts Co., Ltd., Xinxiang 453003, China*

<sup>d</sup>*Puyang Institute of Technology, Henan University, Puyang 457000, China*

<sup>e</sup>*College of Chemistry and Materials Engineering, Wenzhou University, Wenzhou 325035, China*

<sup>f</sup>*Institute of New Materials & Industrial Technology, Wenzhou University, Wenzhou 325035, China*

### **Table of contents**

|                                                                |           |
|----------------------------------------------------------------|-----------|
| <b>1. General Information.....</b>                             | <b>2</b>  |
| <b>2. Optimization of the reaction conditions.....</b>         | <b>3</b>  |
| <b>3. Experimental Section.....</b>                            | <b>5</b>  |
| <b>4. Control experiments .....</b>                            | <b>7</b>  |
| <b>5. The data of the products 2a', 3, 5, 6a, 7a, 8a .....</b> | <b>7</b>  |
| <b>6. The NMR of 2a', 3, 5, 6a, 7a, 8a.....</b>                | <b>23</b> |
| <b>7 The HPLC Spectra.....</b>                                 | <b>69</b> |
| <b>8 The data of crystal structure.....</b>                    | <b>75</b> |

## 1. General Information

Unless otherwise stated, all commercially available reagents were used as received. NMR spectra were obtained in CDCl<sub>3</sub> using TMS as the internal standard on the Bruker AVANCE spectrometer at 400 MHz (for <sup>1</sup>H NMR) or 100 MHz (for <sup>13</sup>C NMR), respectively. <sup>1</sup>H NMR coupling constants were reported in Hz. HRMS (m/z) were recorded on Thermo Scientific™ Q Exactive. Flash column chromatography was performed with Huanghai silica gel (300-400) in a mixture of petroleum ether (PE, b.p. 60-90°C) and ethyl acetate (EA) at increased pressure. The 2-bromo-enals **1** were synthesized from the corresponding cinnamaldehydes and Br<sub>2</sub> according to the literatures.<sup>1-2</sup> Vicinal haloamines **2** and **4** were prepared from chalcones according to known literatures.<sup>3-5</sup> The NHC precursors were synthesized by using known methods.<sup>6-9</sup>

1. Song, H., Li, Y., Yao, Q.J., Jin, L., Liu, L., Liu, Y.H., and Shi, B.F. Synthesis of Axially Chiral Styrenes through Pd-Catalyzed Asymmetric C-H Olefination Enabled by an Amino Amide Transient Directing Group. *Angew. Chem., Int. Ed.* **2020**, *132*, 6638-6642.
2. Gilley, C.B., Buller, M.J., and Kobayashi, Y. New entry to convertible isocyanides for the ugi reaction and its application to the stereocontrolled formal total synthesis of the proteasome inhibitor Omuralide. *Org. Lett.* **2007**, *9*, 3631-3634.
3. Wu, X.-L.; Wang, G.-W., Aminohalogenation of Electron-Deficient Olefins Promoted by Hypervalent Iodine Compounds. *Eur. J. Org. Chem.*, **2008**, *2008*, 6239-6246.
4. Cai, Y.; Liu, X.; Hui, Y.; Jiang, J.; Wang, W.; Chen, W.; Lin, L.; Feng, X., Catalytic Asymmetric Bromoamination of Chalcones: Highly Efficient Synthesis of Chiral  $\alpha$ -Bromo- $\beta$ -Amino Ketone Derivatives. *Angew. Chem., Int. Ed.* **2010**, *49*, 6160-6164.
5. Chen, Z.-G.; Wei, J.-F.; Li, R.-T.; Shi, X.-Y.; Zhao, P.-F., Copper Powder-Catalyzed Regio- and Stereoselective Aminobromination of  $\alpha,\beta$ -Unsaturated Ketones with TsNH<sub>2</sub> and NBS as Nitrogen and Halogen Sources. *J. Org. Chem.* **2009**, *74*, 1371-1373.
6. Kyan, R., Sato, K., Mase, N., Watanabe, N., and Narumi, T. Tuning the Catalyst Reactivity of Imidazolylidene Catalysts through Substituent Effects on the N-Aryl Groups. *Org. Lett.* **2017**, *19*, 2750-2753.
7. Enders, D., Breuer, K., Kallfass, U., and Balensiefer, T. Preparation and application of 1, 3, 4-triphenyl-4, 5-dihydro-1H-1, 2, 4-triazol-5-ylidene, a stable carbene. *Synthesis* **2003**, *8*, 1292-1295.

8. Vlahakis, J.Z., Lazar, C., Crandall, I.E., and Szarek, W.A. Anti-Plasmodium activity of imidazolium and triazolium salts. *Bioorg Med Chem.* **2010**, *18*, 6184-6196.

9. Romanov-Michailidis, F., Besnard, C., and Alexakis, A. N-Heterocyclic carbene-catalyzed annulation of  $\alpha$ -cyano-1, 4-diketones with ynals. *Org. Lett.* **2012**, *14*, 4906-4909.

## 2. Optimization of the reaction conditions

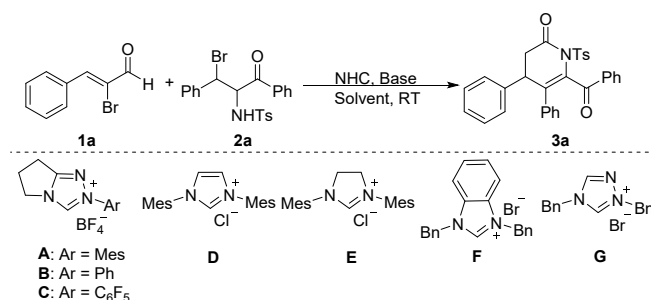

| Entry | Catalyst | base                            | solvent            | Yield (%) <sup>b</sup> |
|-------|----------|---------------------------------|--------------------|------------------------|
| 1     | A        | DABCO                           | CH <sub>3</sub> CN | 53                     |
| 2     | B        | DABCO                           | CH <sub>3</sub> CN | 50                     |
| 3     | C        | DABCO                           | CH <sub>3</sub> CN | NR                     |
| 4     | D        | DABCO                           | CH <sub>3</sub> CN | Trace                  |
| 5     | E        | DABCO                           | CH <sub>3</sub> CN | Trace                  |
| 6     | F        | DABCO                           | CH <sub>3</sub> CN | 26                     |
| 7     | G        | DABCO                           | CH <sub>3</sub> CN | 60                     |
| 8     | G        | Cs <sub>2</sub> CO <sub>3</sub> | CH <sub>3</sub> CN | ND                     |
| 9     | G        | Et <sub>3</sub> N               | CH <sub>3</sub> CN | Trace                  |
| 10    | G        | DBU                             | CH <sub>3</sub> CN | Trace                  |
| 11    | G        | DIPEA                           | CH <sub>3</sub> CN | Trace                  |
| 12    | G        | Pyridine                        | CH <sub>3</sub> CN | NR                     |
| 13    | G        | DMAP                            | CH <sub>3</sub> CN | 72                     |
| 14    | G        | DMAP                            | Toluene            | 93                     |
| 15    | G        | DMAP                            | DCM                | 60                     |
| 16    | G        | DMAP                            | EA                 | 85                     |
| 17    | G        | DMAP                            | THF                | 72                     |
| 18    | G        | DMAP                            | DMF                | 42                     |
| 19    | G        | DMAP                            | MTBE               | 34                     |

<sup>a</sup> Reaction conditions: **1a** (0.12 mmol), **2a** (0.1 mmol), Cat (0.02 mmol), Base (0.3 mmol), Solvent (1.5 ml), 48 h at room temperature. <sup>b</sup> Isolated yields.

At the outset of this study, the feasibility of this protocol was focused on evaluate the reaction by

using 2-bromoenal **1a** and  $\alpha$ -amino- $\beta$ -bromo ketone derivative **2a** as the model reaction substrates in the presence of NHC produced from triazolium salt **A** as a catalyst, DABCO as the base in acetonitrile. Under these reaction conditions, the reaction furnished the desired product of dihydropyridin-2-ones **3a** in 53% yield (entry 1). In contrast to the NHC precatalyst **A**, other NHC precursors **B–F** were found to be ineffective in facilitating this aza-[3+3] annulation reaction (entries 2-6). Notably, when the NHC precursor **G** was used in this procedure, a promising yield of the target product **3a** was observed (entry 7). Then, with **G** as the ideal precatalyst, several different bases were carried out for further screen. These results showed that the base has significant influence on the reaction yield of the desired product and reaction pathways. As shown in the table below, different types of bases investigations were employed and these results identified that both nucleophilicity and basicity of the base exerted a significant direct impact on the reaction process. As anticipated,  $\text{Cs}_2\text{CO}_3$  acting as a Brønsted base can only be allowed to release the NHC as an efficient catalyst and Promote the nucleophilic substitution reaction for debromination of vicinal haloamine **2a** to deliver 2- benzoyl-3-phenyl-1-tosylaziridine product. However, it has no effect to further promote intermolecular cyclization reaction for the efficient synthesis of target product. The results of this study also indicate that the nucleophilicity of the base plays an essential role in the transformation process (entry 7 vs entry 8). Accordingly, other canonical organic bases including  $\text{Et}_3\text{N}$ , DBU and DIPEA were then investigated, and all of them only provided a very small amount of the desired reaction product (entries 9-11). Then, we tried to use pyridine which has been successfully applied to the formation of pyridinium salts as an organic base to promote the reaction, but no desired product was detected. These results suggested that DMAP is a proper base for further the optimization of reaction conditions (entry 13). And hence various solvents optimization studies were performed in DMAP and these results suggested that toluene was the best choice affording the desired **3a** in 93% yield (entry 14 vs entries 13-19). Finally, the best result could be achieved by using the NHC precursor **G** (20 mmol%), DMAP (3.0 equiv) in toluene at rt.

### 3. Experimental Section

#### General procedure for the preparation of **2a'**.

Under N<sub>2</sub> atmosphere,  $\alpha$ -amino- $\beta$ -bromo ketone derivative **2a** (0.1 mmol) and DMAP (0.1 mmol) were successively added into a 10 ml reaction tube, then toluene (1.5 ml) was added with stirring. The resulting mixture was continuously stirred at room temperature. After completion, the solid **2a'** were obtained by suction filtration and was washed with a small amount of toluene.

#### **General procedure for the synthesis of 3 and 5.**

Under N<sub>2</sub> atmosphere, 2-bromoaldehydes **1** (0.12 mmol), Vicinal haloamines **2** or **4** (0.1 mmol), NHC precursor **G** (0.02 mmol), and DMAP (0.3 mmol) were successively added into a 10 ml reaction tube, then toluene (1.5 ml) was added with stirring. The resulting mixture was continuously stirred at room temperature. After completion, the products **3** or **5** were obtained by flash column chromatography on a short packed silica gel column eluting with petroleum ether/EtOAc (3:1).

#### **A typical procedure for the preparation of 6a.**

Under N<sub>2</sub> atmosphere, a dry reaction tube was charged with **3a** (51 mg, 0.1 mmol) and CH<sub>3</sub>OH (1.5 ml). Then Cs<sub>2</sub>CO<sub>3</sub> (49 mg, 0.15 mmol) was added with stirring, the mixture was stirred for 12 h at room temperature. After completion, the solvent was removed under reduced pressure and the residue was purified by flash column chromatography on a short packed silica gel column eluting with petroleum ether/EtOAc (3:1).

#### **A typical procedure for the preparation of 7a.**

A dry reaction tube was charged with **3a** (51 mg, 0.1 mmol) and toluene (1.5 ml). Then DBU (23  $\mu$ l, 0.15 mmol) was added with stirring, the mixture was stirred for 24 h at room temperature in open-air atmosphere. After completion, the product **7a** was obtained by flash column chromatography on a short packed silica gel column eluting with petroleum ether/EtOAc (1:1).

#### **A typical procedure for the preparation of 8a.**

A dry reaction tube was charged with **3a** (51 mg, 0.1 mmol), Pd/C (10 mol %), Na<sub>2</sub>CO<sub>3</sub> (400 mol %) and MeOH (2 mL) at room temperature under argon. Then the vial was placed under vacuum and back-filled with argon three times. After removal of the argon atmosphere with vacuum, a hydrogen balloon was placed in the vial and the mixture was stirred for 48 h. After completion, the product **8a** was obtained by flash column chromatography on a short packed silica gel column eluting with petroleum ether/EtOAc (3:1).

#### **Scope Limitation:**

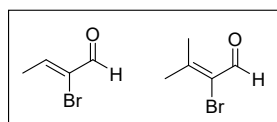

low reactivity

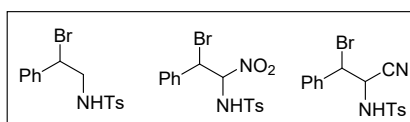

messy

## The preliminary investigation of enantioselectivity of this protocol.

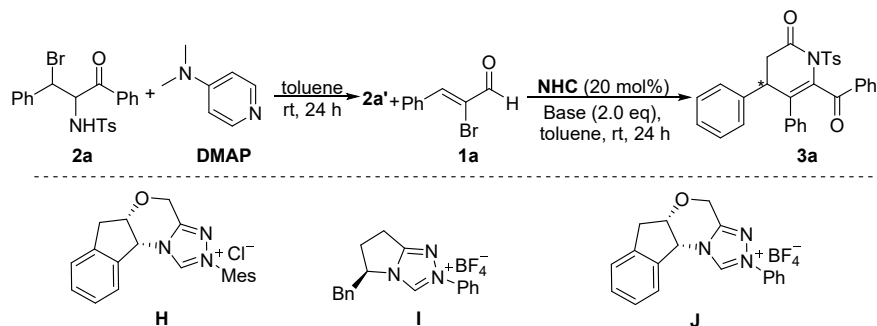

| Entry | Base                           | Catalyst | Yield (%) <sup>[b]</sup> | ee <sup>[c]</sup> |
|-------|--------------------------------|----------|--------------------------|-------------------|
| 1     | DMAP                           | H        | 90                       | 78                |
| 2     | DMAP                           | I        | 81                       | -32               |
| 3     | DMAP                           | J        | 92                       | 73                |
| 4     | K <sub>2</sub> CO <sub>3</sub> | H        | 78                       | 83                |
| 5     | DABCO                          | H        | 84                       | 92                |
| 6     | DIPEA                          | H        | 80                       | 85                |

<sup>[a]</sup> Reaction conditions: **2a** (0.1 mmol), DMAP (0.1 mmol), toluene (1.5 ml), room temperature, 24 h. Then, **1a** (0.12 mmol), NHC (0.02 mmol), Base (0.2 mmol) was added with stirring at room temperature for 24 h under an N<sub>2</sub> atmosphere. <sup>[b]</sup> Isolated yields. <sup>[c]</sup> Ee was determined via HPLC on chiral stationary phase.

## 4. Control experiments

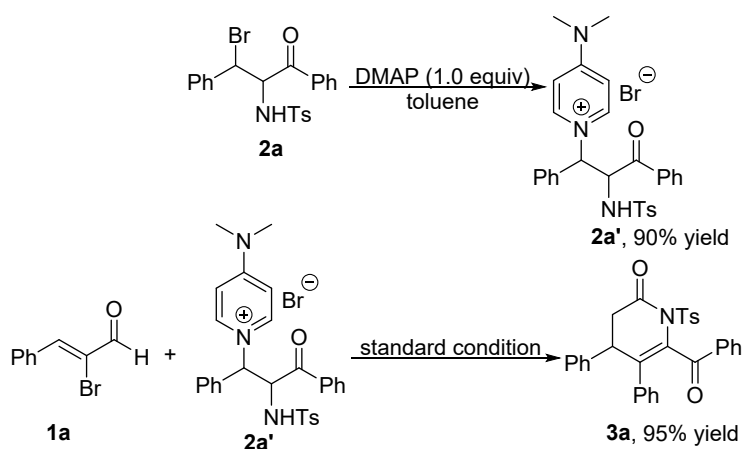

To investigate whether the salt was a possible reaction intermediate, dimethylaminopyridinium

salt **2a'** was isolated in a yield of 90% and subjected to the reaction. The reaction smoothly performed under standard conditions, and the desired product **3a** was isolated in 95% yield (Scheme 7a). These results indicated that DMAP plays a crucial role in this transformation.

## 5. The data of the products **2a'**, **3**, **5**, **6a**, **7a**, **8a**

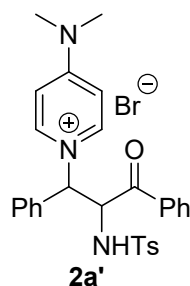

**4-(dimethylamino)-1-((4-methylphenyl)sulfonamido)-3-oxo-1,3-diphenylpropylpyridin-1-ium bromide 2a'**: white solid,  $^1\text{H}$  NMR (400 MHz,  $\text{CDCl}_3$ )  $\delta$  8.10 (s, 2H), 7.74 (d,  $J = 5.2$  Hz, 2H), 7.69 (d,  $J = 7.8$  Hz, 2H), 7.59 (d,  $J = 7.6$  Hz, 2H), 7.54 (d,  $J = 7.2$  Hz, 1H), 7.43 (t,  $J = 7.4$  Hz, 2H), 7.34 (s, 3H), 7.21 – 7.10 (m, 3H), 7.03 (s, 1H), 6.82 (d,  $J = 6.4$  Hz, 2H), 3.22 (d,  $J = 10.5$  Hz, 7H), 2.31 (s, 3H);  $^{13}\text{C}$  NMR (100 MHz,  $\text{CDCl}_3$ )  $\delta$  193.7, 157.4, 144.1, 139.1, 138.5, 136.4, 136.3, 132.7, 132.4, 131.4, 130.7, 130.4, 129.5, 129.1, 128.5, 128.4, 127.4, 106.9, 40.4, 21.5. HRMS (FTMS-ESI):  $[\text{M} + \text{H}]^+$  calcd for  $\text{C}_{29}\text{H}_{31}\text{BrN}_3\text{O}_3\text{S}^+$ : 580.1264; found: 580.1102.

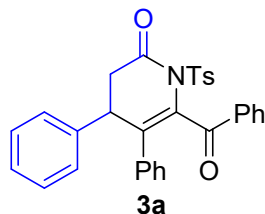

**6-benzoyl-4,5-diphenyl-1-tosyl-3,4-dihydropyridin-2(1H)-one 3a**: white solid,  $^1\text{H}$  NMR (400 MHz,  $\text{CDCl}_3$ )  $\delta$  7.97 (d,  $J = 7.9$  Hz, 2H), 7.84 (d,  $J = 7.7$  Hz, 2H), 7.53 – 7.43 (m, 4H), 7.37 (t,  $J = 7.0$  Hz, 1H), 7.30 (dd,  $J = 12.7, 7.7$  Hz, 3H), 7.19 (t,  $J = 7.5$  Hz, 2H), 6.95 (d,  $J = 4.8$  Hz, 3H), 6.88 (d,  $J = 4.7$  Hz, 2H), 3.93 (d,  $J = 5.3$  Hz, 1H), 3.18 (dd,  $J = 16.4, 6.4$  Hz, 1H), 2.85 (d,  $J = 16.5$  Hz, 1H), 2.43 (s, 3H);  $^{13}\text{C}$  NMR (100 MHz,  $\text{CDCl}_3$ )  $\delta$  191.5, 169.3, 145.4, 138.3, 137.6, 136.8, 135.3, 133.7, 132.9, 132.7, 129.9, 129.7, 129.5, 129.2, 128.2, 128.1, 128.0, 127.9, 127.8, 127.7, 45.0, 41.8, 21.8. HRMS (FTMS-APCI):  $[\text{M} + \text{H}]^+$  calcd for  $\text{C}_{31}\text{H}_{26}\text{NO}_4\text{S}^+$ : 508.1577; found: 508.1581.

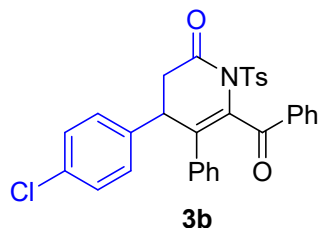

**6-benzoyl-4-(4-chlorophenyl)-5-phenyl-1-tosyl-3,4-dihydropyridin-2(1H)-one 3b**: white solid,  $^1\text{H}$  NMR (400 MHz,  $\text{CDCl}_3$ )  $\delta$  7.94 (d,  $J = 7.8$  Hz, 2H), 7.81 (d,  $J = 7.7$  Hz, 2H), 7.42 (s, 4H), 7.30 (t,  $J$

= 8.0 Hz, 3H), 7.19 (t,  $J$  = 7.4 Hz, 2H), 6.96 (d,  $J$  = 4.9 Hz, 3H), 6.87 (d,  $J$  = 4.8 Hz, 2H), 3.89 (d,  $J$  = 5.5 Hz, 1H), 3.16 (dd,  $J$  = 16.5, 6.3 Hz, 1H), 2.81 (d,  $J$  = 16.5 Hz, 1H), 2.43 (s, 3H);  $^{13}\text{C}$  NMR (100 MHz,  $\text{CDCl}_3$ )  $\delta$  191.3, 169.0, 145.5, 137.3, 136.8, 136.7, 135.1, 134.0, 133.9, 132.8, 132.6, 129.8, 129.7, 129.2, 129.0, 128.3, 127.9, 127.7, 44.4, 41.6, 21.8. HRMS (FTMS-APCI):  $[\text{M} + \text{H}]^+$  calcd for  $\text{C}_{31}\text{H}_{25}\text{ClNO}_4\text{S}^+$ : 542.1187; found: 542.1189.

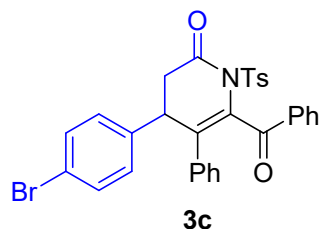

**6-benzoyl-4-(4-bromophenyl)-5-phenyl-1-tosyl-3,4-dihydropyridin-2(1H)-one 3c**: white solid,  $^1\text{H}$  NMR (400 MHz,  $\text{CDCl}_3$ )  $\delta$  7.94 (d,  $J$  = 8.1 Hz, 2H), 7.81 (d,  $J$  = 7.6 Hz, 2H), 7.57 (d,  $J$  = 8.0 Hz, 2H), 7.36 (d,  $J$  = 8.0 Hz, 2H), 7.30 (t,  $J$  = 8.3 Hz, 3H), 7.19 (t,  $J$  = 7.5 Hz, 2H), 6.96 (d,  $J$  = 4.3 Hz, 3H), 6.87 (d,  $J$  = 4.2 Hz, 2H), 3.87 (d,  $J$  = 3.9 Hz, 1H), 3.16 (dd,  $J$  = 16.5, 6.3 Hz, 1H), 2.81 (d,  $J$  = 16.4 Hz, 1H), 2.43 (s, 3H);  $^{13}\text{C}$  NMR (100 MHz,  $\text{CDCl}_3$ )  $\delta$  191.3, 168.9, 145.5, 137.4, 137.3, 136.6, 135.1, 134.0, 132.8, 132.7, 132.5, 129.8, 129.7, 129.3, 129.2, 128.3, 127.9, 127.7, 122.1, 44.4, 41.5, 21.8. HRMS (FTMS-APCI):  $[\text{M} + \text{H}]^+$  calcd for  $\text{C}_{31}\text{H}_{25}\text{BrNO}_4\text{S}^+$ : 586.0682; found: 586.0684.

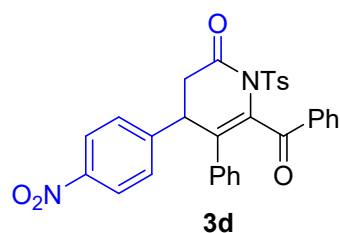

**6-benzoyl-4-(4-nitrophenyl)-5-phenyl-1-tosyl-3,4-dihydropyridin-2(1H)-one 3d**: white solid,  $^1\text{H}$  NMR (400 MHz,  $\text{CDCl}_3$ )  $\delta$  7.95 (d,  $J$  = 8.4 Hz, 2H), 7.82 (d,  $J$  = 7.9 Hz, 2H), 7.55 (d,  $J$  = 7.7 Hz, 2H), 7.41 (t,  $J$  = 7.3 Hz, 1H), 7.28 (d,  $J$  = 8.0 Hz, 2H), 7.17 (dd,  $J$  = 15.5, 7.6 Hz, 3H), 7.10 (t,  $J$  = 7.2 Hz, 2H), 7.05 (d,  $J$  = 8.2 Hz, 3H), 6.89 (d,  $J$  = 7.2 Hz, 2H), 4.01 (d,  $J$  = 19.8 Hz, 1H), 3.26 (d,  $J$  = 19.8 Hz, 1H), 2.43 (s, 3H);  $^{13}\text{C}$  NMR (100 MHz,  $\text{CDCl}_3$ )  $\delta$  193.4, 167.9, 146.8, 145.5, 144.9, 136.4, 134.5, 134.4, 134.0, 133.1, 132.6, 129.6, 129.5, 129.22, 129.18, 129.1, 129.0, 128.6, 128.4, 123.4, 66.1, 40.3, 21.7. HRMS (FTMS-APCI):  $[\text{M} + \text{H}]^+$  calcd for  $\text{C}_{31}\text{H}_{25}\text{N}_2\text{O}_6\text{S}^+$ : 553.1428; found: 553.1431.

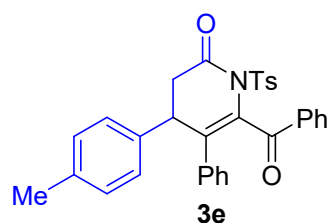

**6-benzoyl-5-phenyl-4-(p-tolyl)-1-tosyl-3,4-dihydropyridin-2(1H)-one 3e**: white solid,  $^1\text{H}$  NMR (400 MHz,  $\text{CDCl}_3$ )  $\delta$  7.96 (d,  $J$  = 7.7 Hz, 2H), 7.84 (d,  $J$  = 7.5 Hz, 2H), 7.39 (d,  $J$  = 7.3 Hz, 2H), 7.28 (dd,  $J$  = 13.9, 7.7 Hz, 5H), 7.18 (t,  $J$  = 7.3 Hz, 2H), 6.97 – 6.86 (m, 5H), 3.87 (d,  $J$  = 4.6 Hz, 1H), 3.14 (dd,  $J$  = 16.3, 6.1 Hz, 1H), 2.81 (d,  $J$  = 16.3 Hz, 1H), 2.40 (d,  $J$  = 13.0 Hz, 6H);  $^{13}\text{C}$  NMR (100 MHz,  $\text{CDCl}_3$ )  $\delta$  191.6, 169.4, 145.3, 137.7, 136.8, 135.4, 135.2, 133.6, 133.1, 132.7, 130.2, 129.9, 129.7, 129.1, 128.2, 128.1, 127.9, 127.7, 127.5, 44.7, 41.9, 21.7, 21.2. HRMS (FTMS-APCI):  $[\text{M} + \text{H}]^+$  calcd for  $\text{C}_{32}\text{H}_{28}\text{NO}_4\text{S}^+$ : 522.1734; found: 522.1736.

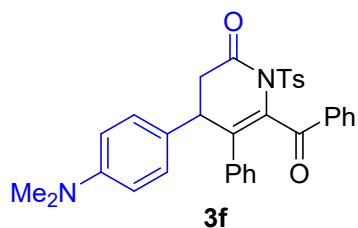

**6-benzoyl-4-(4-(dimethylamino)phenyl)-5-phenyl-1-tosyl-3,4-dihydropyridin-2(1H)-one 3f:** brown solid,  $^1\text{H}$  NMR (400 MHz,  $\text{CDCl}_3$ )  $\delta$  7.97 (d,  $J = 8.1$  Hz, 2H), 7.84 (d,  $J = 7.6$  Hz, 2H), 7.36 (d,  $J = 8.3$  Hz, 2H), 7.28 (dd,  $J = 16.2, 8.0$  Hz, 3H), 7.17 (t,  $J = 7.5$  Hz, 2H), 6.93 (s, 5H), 6.80 (d,  $J = 8.4$  Hz, 2H), 3.79 (d,  $J = 4.3$  Hz, 1H), 3.12 (dd,  $J = 16.4, 6.4$  Hz, 1H), 2.98 (s, 6H), 2.79 (d,  $J = 16.4$  Hz, 1H), 2.41 (s, 3H);  $^{13}\text{C}$  NMR (100 MHz,  $\text{CDCl}_3$ )  $\delta$  191.7, 169.7, 150.2, 145.2, 138.0, 136.9, 135.5, 133.6, 133.1, 132.6, 129.9, 129.7, 129.1, 128.3, 128.1, 128.0, 127.8, 127.7, 125.4, 113.3, 44.3, 41.9, 40.5, 21.7. HRMS (FTMS-APCI):  $[\text{M} + \text{H}]^+$  calcd for  $\text{C}_{33}\text{H}_{31}\text{N}_2\text{O}_4\text{S}^+$ : 551.1999; found: 551.2004.

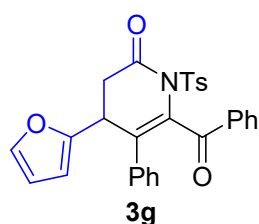

**6-benzoyl-4-(furan-2-yl)-5-phenyl-1-tosyl-3,4-dihydropyridin-2(1H)-one 3g:** white solid,  $^1\text{H}$  NMR (400 MHz,  $\text{CDCl}_3$ )  $\delta$  7.95 (d,  $J = 7.9$  Hz, 2H), 7.77 (d,  $J = 7.8$  Hz, 2H), 7.49 (s, 1H), 7.32 (d,  $J = 8.0$  Hz, 2H), 7.28 (s, 1H), 7.17 (t,  $J = 7.5$  Hz, 2H), 7.09 (d,  $J = 5.2$  Hz, 2H), 7.01 (d,  $J = 5.4$  Hz, 3H), 6.47 (d,  $J = 20.6$  Hz, 2H), 3.92 (s, 1H), 3.06 (dd,  $J = 16.7, 5.5$  Hz, 1H), 2.96 (d,  $J = 16.5$  Hz, 1H), 2.43 (s, 3H);  $^{13}\text{C}$  NMR (100 MHz,  $\text{CDCl}_3$ )  $\delta$  191.6, 169.3, 151.7, 145.2, 143.0, 137.2, 136.6, 135.4, 133.4, 132.7, 131.7, 129.9, 129.7, 129.1, 128.33, 128.28, 128.0, 127.8, 110.9, 107.7, 38.8, 38.7, 21.7. HRMS (FTMS-APCI):  $[\text{M} + \text{H}]^+$  calcd for  $\text{C}_{29}\text{H}_{24}\text{NO}_5\text{S}^+$ : 498.1370; found: 498.1373.

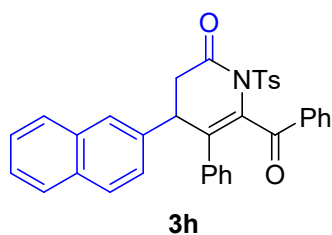

**6-benzoyl-4-(naphthalen-2-yl)-5-phenyl-1-tosyl-3,4-dihydropyridin-2(1H)-one 3h:** white solid,  $^1\text{H}$  NMR (400 MHz,  $\text{CDCl}_3$ )  $\delta$  8.07 (s, 1H), 7.89 (dd,  $J = 15.5, 8.1$  Hz, 7H), 7.59 – 7.46 (m, 3H), 7.29 (t,  $J = 6.8$  Hz, 1H), 7.19 (t,  $J = 7.9$  Hz, 4H), 6.94 (s, 5H), 4.06 (d,  $J = 3.9$  Hz, 1H), 3.23 (dd,  $J = 16.4, 6.2$  Hz, 1H), 2.94 (d,  $J = 16.5$  Hz, 1H), 2.35 (s, 3H);  $^{13}\text{C}$  NMR (100 MHz,  $\text{CDCl}_3$ )  $\delta$  191.5, 169.2, 145.3, 137.6, 136.8, 135.7, 135.2, 133.8, 133.7, 133.0, 132.7, 129.9, 129.6, 129.5, 129.1, 128.3, 128.23, 128.20, 127.9, 127.8, 127.7, 126.7, 126.6, 126.4, 125.5, 45.1, 41.5, 21.7. HRMS (FTMS-APCI):  $[\text{M} + \text{H}]^+$  calcd for  $\text{C}_{35}\text{H}_{28}\text{NO}_4\text{S}^+$ : 558.1734; found: 558.1738.

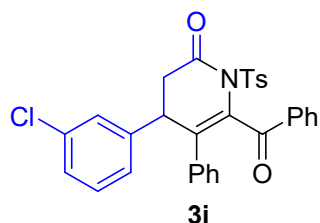

**6-benzoyl-4-(3-chlorophenyl)-5-phenyl-1-tosyl-3,4-dihydropyridin-2(1H)-one 3i:** white solid,  $^1\text{H}$  NMR (400 MHz,  $\text{CDCl}_3$ )  $\delta$  7.94 (d,  $J$  = 7.9 Hz, 2H), 7.83 (d,  $J$  = 7.6 Hz, 2H), 7.47 (d,  $J$  = 7.5 Hz, 1H), 7.44 – 7.37 (m, 2H), 7.31 (dd,  $J$  = 17.7, 10.0 Hz, 4H), 7.20 (t,  $J$  = 7.5 Hz, 2H), 6.97 (d,  $J$  = 4.3 Hz, 3H), 6.88 (d,  $J$  = 4.4 Hz, 2H), 3.90 (d,  $J$  = 4.1 Hz, 1H), 3.16 (dd,  $J$  = 16.5, 6.3 Hz, 1H), 2.83 (d,  $J$  = 16.5 Hz, 1H), 2.42 (s, 3H);  $^{13}\text{C}$  NMR (100 MHz,  $\text{CDCl}_3$ )  $\delta$  191.3, 168.8, 145.5, 140.4, 137.2, 136.7, 135.3, 135.2, 134.1, 132.8, 132.2, 130.9, 129.8, 129.7, 129.2, 128.30, 128.29, 128.2, 127.9, 127.7, 125.6, 44.6, 41.5, 21.8. HRMS (FTMS-APCI):  $[\text{M} + \text{H}]^+$  calcd for  $\text{C}_{31}\text{H}_{25}\text{ClNO}_4\text{S}^+$ : 542.1187; found: 542.1194.

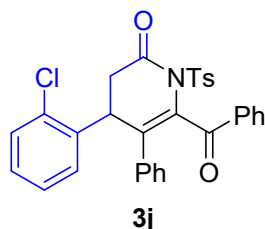

**6-benzoyl-4-(2-chlorophenyl)-5-phenyl-1-tosyl-3,4-dihydropyridin-2(1H)-one 3j:** white solid,  $^1\text{H}$  NMR (400 MHz,  $\text{CDCl}_3$ )  $\delta$  7.97 (d,  $J$  = 7.6 Hz, 2H), 7.91 (d,  $J$  = 7.6 Hz, 1H), 7.86 (d,  $J$  = 7.8 Hz, 2H), 7.51 – 7.44 (m, 2H), 7.31 (dd,  $J$  = 13.7, 7.6 Hz, 4H), 7.20 (t,  $J$  = 7.3 Hz, 2H), 6.94 (d,  $J$  = 5.2 Hz, 3H), 6.84 (d,  $J$  = 5.1 Hz, 2H), 4.42 (d,  $J$  = 5.9 Hz, 1H), 3.13 (dd,  $J$  = 16.7, 6.5 Hz, 1H), 2.98 (d,  $J$  = 16.6 Hz, 1H), 2.43 (s, 3H);  $^{13}\text{C}$  NMR (100 MHz,  $\text{CDCl}_3$ )  $\delta$  191.3, 169.1, 145.5, 137.4, 136.6, 135.3, 135.0, 134.8, 133.9, 132.8, 131.9, 130.7, 129.8, 129.7, 129.5, 129.2, 128.7, 128.3, 128.0, 127.9, 127.5, 41.8, 39.6, 21.7. HRMS (FTMS-APCI):  $[\text{M} + \text{H}]^+$  calcd for  $\text{C}_{31}\text{H}_{25}\text{ClNO}_4\text{S}^+$ : 542.1187; found: 542.1191.

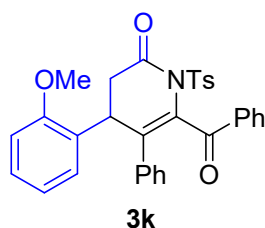

**6-benzoyl-4-(2-methoxyphenyl)-5-phenyl-1-tosyl-3,4-dihydropyridin-2(1H)-one 3k:** white solid,  $^1\text{H}$  NMR (400 MHz,  $\text{CDCl}_3$ )  $\delta$  7.97 (d,  $J$  = 7.6 Hz, 2H), 7.87 (d,  $J$  = 7.6 Hz, 2H), 7.73 (d,  $J$  = 7.3 Hz, 1H), 7.37 – 7.26 (m, 4H), 7.19 (t,  $J$  = 7.3 Hz, 2H), 7.11 (t,  $J$  = 7.4 Hz, 1H), 6.96 – 6.81 (m, 6H), 4.32 (s, 1H), 3.75 (s, 3H), 3.11 – 2.92 (m, 2H), 2.41 (s, 3H);  $^{13}\text{C}$  NMR (100 MHz,  $\text{CDCl}_3$ )  $\delta$  191.5, 170.1, 156.9, 145.2, 137.7, 136.9, 135.6, 134.5, 133.1, 132.6, 129.9, 129.7, 129.3, 129.1, 128.2, 128.0, 127.94, 127.86, 127.7, 125.3, 121.1, 110.9, 55.2, 39.6, 39.3, 21.7. HRMS (FTMS-APCI):  $[\text{M} + \text{H}]^+$  calcd for  $\text{C}_{32}\text{H}_{28}\text{NO}_5\text{S}^+$ : 538.1683; found: 538.1685.

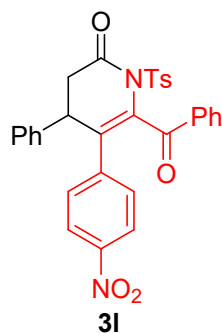

**6-benzoyl-5-(4-nitrophenyl)-4-phenyl-1-tosyl-3,4-dihydropyridin-2(1H)-one 3l:** white solid,  $^1\text{H}$  NMR (400 MHz,  $\text{CDCl}_3$ )  $\delta$  7.94 (d,  $J = 8.1$  Hz, 2H), 7.81 (dd,  $J = 13.0, 8.2$  Hz, 4H), 7.43 (d,  $J = 5.9$  Hz, 4H), 7.34 (dd,  $J = 15.4, 6.2$  Hz, 4H), 7.22 (t,  $J = 7.6$  Hz, 2H), 7.03 (d,  $J = 8.5$  Hz, 2H), 3.91 (s, 1H), 3.18 (dd,  $J = 16.5, 6.5$  Hz, 1H), 2.88 (dd,  $J = 16.5, 3.0$  Hz, 1H), 2.43 (s, 3H);  $^{13}\text{C}$  NMR (100 MHz,  $\text{CDCl}_3$ )  $\delta$  190.6, 168.6, 147.0, 145.7, 144.2, 137.6, 136.4, 135.2, 134.9, 133.4, 129.8, 129.7, 129.3, 128.8, 128.4, 128.3, 127.5, 123.3, 44.6, 41.6, 21.8. HRMS (FTMS-APCI):  $[\text{M} + \text{H}]^+$  calcd for  $\text{C}_{31}\text{H}_{25}\text{N}_2\text{O}_6\text{S}^+$ : 553.1428; found: 553.1430.

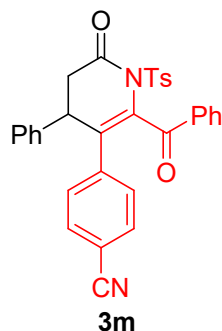

**4-(2-benzoyl-6-oxo-4-phenyl-1-tosyl-1,4,5,6-tetrahydropyridin-3-yl)benzonitrile 3m:** white solid,  $^1\text{H}$  NMR (400 MHz,  $\text{CDCl}_3$ )  $\delta$  7.94 (d,  $J = 8.1$  Hz, 2H), 7.81 (d,  $J = 7.7$  Hz, 2H), 7.47 – 7.40 (m, 4H), 7.34 (dd,  $J = 18.3, 7.3$  Hz, 4H), 7.22 (t,  $J = 7.3$  Hz, 4H), 6.96 (d,  $J = 8.0$  Hz, 2H), 3.89 (d,  $J = 2.7$  Hz, 1H), 3.16 (dd,  $J = 16.5, 6.5$  Hz, 1H), 2.86 (dd,  $J = 16.5, 2.8$  Hz, 1H), 2.43 (s, 3H);  $^{13}\text{C}$  NMR (100 MHz,  $\text{CDCl}_3$ )  $\delta$  190.7, 168.7, 145.7, 142.3, 137.7, 136.4, 135.04, 134.97, 133.4, 131.9, 130.4, 129.8, 129.7, 129.3, 128.6, 128.4, 128.2, 127.5, 118.1, 111.7, 44.6, 41.6, 21.8. HRMS (FTMS-APCI):  $[\text{M} + \text{H}]^+$  calcd for  $\text{C}_{32}\text{H}_{25}\text{N}_2\text{O}_4\text{S}^+$ : 533.1530; found: 533.1532.

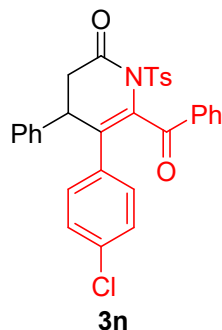

**6-benzoyl-5-(4-chlorophenyl)-4-phenyl-1-tosyl-3,4-dihydropyridin-2(1H)-one 3n:** white solid,  $^1\text{H}$  NMR (400 MHz,  $\text{CDCl}_3$ )  $\delta$  7.95 (d,  $J = 8.1$  Hz, 2H), 7.83 (d,  $J = 7.7$  Hz, 2H), 7.45 (d,  $J = 3.9$  Hz, 4H), 7.34 (dd,  $J = 20.2, 8.0$  Hz, 4H), 7.22 (d,  $J = 7.6$  Hz, 2H), 6.92 (d,  $J = 8.2$  Hz, 2H), 6.80 (d,  $J = 8.2$

Hz, 2H), 3.87 (d,  $J = 3.6$  Hz, 1H), 3.16 (dd,  $J = 16.5, 6.5$  Hz, 1H), 2.85 (d,  $J = 16.5$  Hz, 1H), 2.43 (s, 3H);  $^{13}\text{C}$  NMR (100 MHz,  $\text{CDCl}_3$ )  $\delta$  191.2, 169.0, 145.4, 138.0, 136.6, 136.0, 135.2, 134.2, 134.1, 133.0, 131.4, 129.8, 129.7, 129.6, 129.19, 129.17, 128.4, 128.2, 128.1, 127.6, 44.9, 41.7, 21.7. HRMS (FTMS-APCI):  $[\text{M} + \text{H}]^+$  calcd for  $\text{C}_{31}\text{H}_{25}\text{ClNO}_4\text{S}^+$ : 542.1187; found: 542.1190.

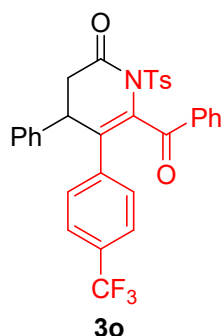

**6-benzoyl-4-phenyl-1-tosyl-5-(4-(trifluoromethyl)phenyl)-3,4-dihydropyridin-2(1H)-one 3o:** white solid,  $^1\text{H}$  NMR (400 MHz,  $\text{CDCl}_3$ )  $\delta$  7.96 (d,  $J = 8.2$  Hz, 2H), 7.80 (d,  $J = 7.4$  Hz, 2H), 7.45 (d,  $J = 4.1$  Hz, 4H), 7.41 – 7.36 (m, 1H), 7.31 (t,  $J = 6.6$  Hz, 3H), 7.20 (t,  $J = 7.4$  Hz, 4H), 6.97 (d,  $J = 8.0$  Hz, 2H), 3.89 (d,  $J = 3.7$  Hz, 1H), 3.18 (dd,  $J = 16.5, 6.6$  Hz, 1H), 2.87 (dd,  $J = 16.5, 2.5$  Hz, 1H), 2.44 (s, 3H);  $^{13}\text{C}$  NMR (100 MHz,  $\text{CDCl}_3$ )  $\delta$  191.0, 168.9, 145.6, 141.2, 137.8, 136.6, 135.1, 134.8, 133.1, 131.1, 129.8, 129.73, 129.67, 129.2, 128.3, 128.2, 128.1, 127.6, 125.1 (q,  $J = 3.5$  Hz), 123.6 (d,  $J = 270.0$  Hz), 122.4 (d,  $J = 580.0$  Hz), 44.7, 41.7, 21.7. HRMS (FTMS-APCI):  $[\text{M} + \text{H}]^+$  calcd for  $\text{C}_{32}\text{H}_{25}\text{F}_3\text{NO}_4\text{S}^+$ : 576.1451; found: 576.1454.

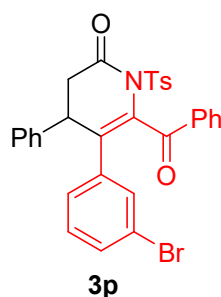

**6-benzoyl-5-(3-bromophenyl)-4-phenyl-1-tosyl-3,4-dihydropyridin-2(1H)-one 3p:** white solid,  $^1\text{H}$  NMR (400 MHz,  $\text{CDCl}_3$ )  $\delta$  7.96 (d,  $J = 7.8$  Hz, 2H), 7.83 (d,  $J = 7.6$  Hz, 2H), 7.45 (d,  $J = 3.0$  Hz, 4H), 7.38 – 7.29 (m, 4H), 7.23 (t,  $J = 7.3$  Hz, 2H), 7.06 (d,  $J = 5.7$  Hz, 1H), 7.01 (s, 1H), 6.84 – 6.74 (m, 2H), 3.94 – 3.84 (m, 1H), 3.14 (dd,  $J = 16.5, 6.3$  Hz, 1H), 2.84 (d,  $J = 16.5$  Hz, 1H), 2.42 (s, 3H);  $^{13}\text{C}$  NMR (100 MHz,  $\text{CDCl}_3$ )  $\delta$  191.2, 169.0, 145.5, 139.4, 137.9, 136.7, 135.2, 134.6, 132.9, 131.1, 131.01, 130.99, 129.7, 129.6, 129.2, 128.2, 128.0, 127.6, 126.2, 122.1, 44.7, 41.7, 21.8. HRMS (FTMS-APCI):  $[\text{M} + \text{H}]^+$  calcd for  $\text{C}_{31}\text{H}_{25}\text{BrNO}_4\text{S}^+$ : 586.0682; found: 586.0684.

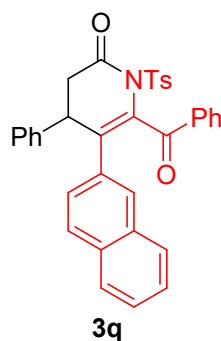

**6-benzoyl-5-(naphthalen-2-yl)-4-phenyl-1-tosyl-3,4-dihydropyridin-2(1H)-one 3q:** white solid,  $^1\text{H}$  NMR (400 MHz,  $\text{CDCl}_3$ )  $\delta$  7.98 (d,  $J$  = 8.0 Hz, 2H), 7.81 (d,  $J$  = 7.5 Hz, 2H), 7.53 (d,  $J$  = 7.5 Hz, 4H), 7.46 (t,  $J$  = 7.4 Hz, 2H), 7.41 – 7.28 (m, 7H), 7.05 (dt,  $J$  = 22.2, 7.1 Hz, 3H), 6.92 (d,  $J$  = 8.5 Hz, 1H), 3.99 (d,  $J$  = 3.5 Hz, 1H), 3.19 (dd,  $J$  = 16.5, 6.3 Hz, 1H), 2.87 (d,  $J$  = 16.5 Hz, 1H), 2.41 (s, 3H);  $^{13}\text{C}$  NMR (100 MHz,  $\text{CDCl}_3$ )  $\delta$  191.8, 169.3, 145.4, 138.3, 136.9, 135.4, 134.8, 134.1, 133.0, 132.5, 132.4, 129.7, 129.6, 129.4, 129.2, 128.3, 128.08, 128.05, 127.8, 127.7, 127.4, 126.6, 126.5, 124.6, 44.9, 41.8, 21.8. HRMS (FTMS-APCI):  $[\text{M} + \text{H}]^+$  calcd for  $\text{C}_{35}\text{H}_{28}\text{NO}_4\text{S}^+$ : 558.1734; found: 558.1737.

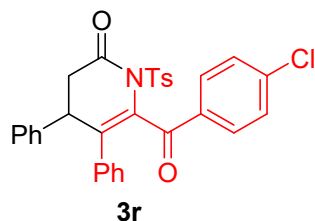

**6-(4-chlorobenzoyl)-4,5-diphenyl-1-tosyl-3,4-dihydropyridin-2(1H)-one 3r:** white solid,  $^1\text{H}$  NMR (400 MHz,  $\text{CDCl}_3$ )  $\delta$  7.96 (d,  $J$  = 7.8 Hz, 2H), 7.76 (d,  $J$  = 7.8 Hz, 2H), 7.51 – 7.42 (m, 4H), 7.38 (d,  $J$  = 6.3 Hz, 1H), 7.32 (d,  $J$  = 7.9 Hz, 2H), 7.16 (d,  $J$  = 7.8 Hz, 2H), 6.99 (p,  $J$  = 6.8 Hz, 3H), 6.86 (d,  $J$  = 7.2 Hz, 2H), 3.93 (d,  $J$  = 5.1 Hz, 1H), 3.16 (dd,  $J$  = 16.5, 6.3 Hz, 1H), 2.85 (d,  $J$  = 16.4 Hz, 1H), 2.43 (s, 3H);  $^{13}\text{C}$  NMR (100 MHz,  $\text{CDCl}_3$ )  $\delta$  190.4, 169.1, 145.5, 138.9, 138.2, 137.3, 135.2, 133.4, 133.1, 131.1, 129.7, 129.6, 129.2, 128.4, 128.3, 128.2, 128.1, 127.7, 127.6, 45.0, 41.7, 21.7. HRMS (FTMS-APCI):  $[\text{M} + \text{H}]^+$  calcd for  $\text{C}_{31}\text{H}_{25}\text{ClNO}_4\text{S}^+$ : 542.1191; found: 542.1191.

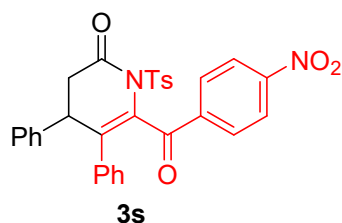

**6-(4-nitrobenzoyl)-4,5-diphenyl-1-tosyl-3,4-dihydropyridin-2(1H)-one 3s:** white solid,  $^1\text{H}$  NMR (400 MHz,  $\text{CDCl}_3$ )  $\delta$  8.02 (d,  $J$  = 8.5 Hz, 2H), 7.96 (d,  $J$  = 6.1 Hz, 4H), 7.46 (d,  $J$  = 3.9 Hz, 4H), 7.41 – 7.36 (m, 1H), 7.35 (d,  $J$  = 8.1 Hz, 2H), 6.98 (t,  $J$  = 9.3 Hz, 3H), 6.84 (d,  $J$  = 6.8 Hz, 2H), 3.96 (d,  $J$  = 3.1 Hz, 1H), 3.17 (dd,  $J$  = 16.6, 6.4 Hz, 1H), 2.88 (d,  $J$  = 16.6 Hz, 1H), 2.45 (s, 3H);  $^{13}\text{C}$  NMR (100 MHz,  $\text{CDCl}_3$ )  $\delta$  190.1, 169.0, 149.5, 145.7, 141.5, 138.0, 136.9, 135.0, 134.2, 133.0, 130.6, 129.6, 129.3, 128.8, 128.5, 128.2, 127.8, 127.6, 123.0, 44.9, 41.7, 21.8. HRMS (FTMS-APCI):  $[\text{M} + \text{H}]^+$  calcd for  $\text{C}_{31}\text{H}_{25}\text{N}_2\text{O}_6\text{S}^+$ : 553.1428; found: 553.1430.

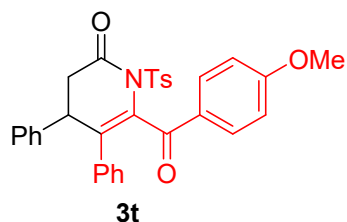

**6-(4-methoxybenzoyl)-4,5-diphenyl-1-tosyl-3,4-dihydropyridin-2(1H)-one 3t:** white solid,  $^1\text{H}$  NMR (400 MHz,  $\text{CDCl}_3$ )  $\delta$  7.97 (d,  $J$  = 8.1 Hz, 2H), 7.83 (d,  $J$  = 8.6 Hz, 2H), 7.50 (d,  $J$  = 7.3 Hz, 2H), 7.45 (t,  $J$  = 7.4 Hz, 2H), 7.36 (t,  $J$  = 7.1 Hz, 1H), 7.30 (d,  $J$  = 8.1 Hz, 2H), 6.96 (t,  $J$  = 7.1 Hz, 3H), 6.91 (d,  $J$  = 4.8 Hz, 2H), 6.68 (d,  $J$  = 8.5 Hz, 2H), 3.91 (d,  $J$  = 4.1 Hz, 1H), 3.73 (s, 3H), 3.16 (dd,  $J$  = 16.5, 6.5 Hz, 1H), 2.83 (d,  $J$  = 16.5 Hz, 1H), 2.42 (s, 3H);  $^{13}\text{C}$  NMR (100 MHz,  $\text{CDCl}_3$ )  $\delta$  190.0, 169.3,

163.1, 145.2, 138.4, 137.9, 135.4, 133.8, 132.2, 132.0, 129.9, 129.7, 129.5, 129.1, 128.2, 128.1, 128.0, 127.7, 127.6, 113.3, 55.4, 45.0, 41.8, 21.7. HRMS (FTMS-APCI):  $[M + H]^+$  calcd for  $C_{32}H_{28}NO_5S^+$ : 538.1683; found: 538.1687.

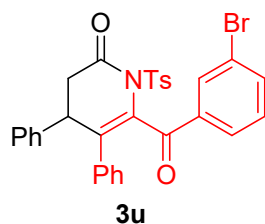

**6-(3-bromobenzoyl)-4,5-diphenyl-1-tosyl-3,4-dihydropyridin-2(1H)-one 3u:** white solid,  $^1H$  NMR (400 MHz,  $CDCl_3$ )  $\delta$  8.00 – 7.92 (m, 3H), 7.74 (d,  $J = 7.7$  Hz, 1H), 7.51 – 7.42 (m, 4H), 7.38 (d,  $J = 7.7$  Hz, 2H), 7.32 (d,  $J = 8.1$  Hz, 2H), 7.04 (t,  $J = 7.9$  Hz, 1H), 6.98 (d,  $J = 4.4$  Hz, 3H), 6.86 (d,  $J = 4.3$  Hz, 2H), 3.95 (d,  $J = 3.1$  Hz, 1H), 3.15 (dd,  $J = 16.5, 6.4$  Hz, 1H), 2.86 (dd,  $J = 16.5, 2.2$  Hz, 1H), 2.43 (s, 3H);  $^{13}C$  NMR (100 MHz,  $CDCl_3$ )  $\delta$  190.2, 169.1, 145.5, 138.4, 138.1, 137.3, 135.4, 135.2, 133.6, 133.3, 132.7, 129.7, 129.6, 129.4, 129.2, 128.42, 128.37, 128.3, 128.1, 127.7, 127.6, 122.0, 44.9, 41.7, 21.8. HRMS (FTMS-APCI):  $[M + H]^+$  calcd for  $C_{31}H_{25}BrNO_4S^+$ : 586.0682; found: 586.0685.

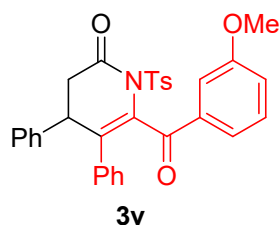

**6-(3-methoxybenzoyl)-4,5-diphenyl-1-tosyl-3,4-dihydropyridin-2(1H)-one 3v:** white solid,  $^1H$  NMR (400 MHz,  $CDCl_3$ )  $\delta$  7.96 (d,  $J = 7.8$  Hz, 2H), 7.50 (d,  $J = 7.5$  Hz, 2H), 7.45 (t,  $J = 7.9$  Hz, 3H), 7.39 – 7.34 (m, 2H), 7.31 (d,  $J = 8.0$  Hz, 2H), 7.09 (t,  $J = 7.9$  Hz, 1H), 6.97 (d,  $J = 6.0$  Hz, 3H), 6.89 (d,  $J = 6.6$  Hz, 2H), 6.85 (d,  $J = 8.2$  Hz, 1H), 3.93 (d,  $J = 5.7$  Hz, 1H), 3.74 (s, 3H), 3.18 (dd,  $J = 16.5, 6.4$  Hz, 1H), 2.86 (d,  $J = 16.5$  Hz, 1H), 2.43 (s, 3H);  $^{13}C$  NMR (100 MHz,  $CDCl_3$ )  $\delta$  191.2, 169.2, 159.0, 145.3, 138.3, 138.0, 137.7, 135.3, 133.7, 132.8, 129.7, 129.5, 129.2, 128.9, 128.2, 128.0, 127.7, 127.6, 122.8, 119.7, 113.7, 55.3, 45.0, 41.7, 21.7. HRMS (FTMS-APCI):  $[M + H]^+$  calcd for  $C_{32}H_{28}NO_5S^+$ : 538.1683; found: 538.1685.

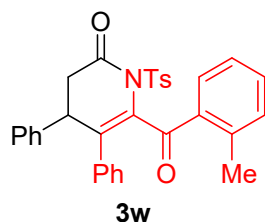

**6-(2-methylbenzoyl)-4,5-diphenyl-1-tosyl-3,4-dihydropyridin-2(1H)-one 3w:** white solid,  $^1H$  NMR (400 MHz,  $CDCl_3$ )  $\delta$  7.95 (d,  $J = 8.0$  Hz, 2H), 7.88 (d,  $J = 7.7$  Hz, 1H), 7.41 (d,  $J = 12.6$  Hz, 4H), 7.34 (d,  $J = 3.8$  Hz, 1H), 7.29 (d,  $J = 8.1$  Hz, 2H), 7.13 (t,  $J = 7.4$  Hz, 1H), 7.05 (t,  $J = 7.5$  Hz, 1H), 6.95 (d,  $J = 7.3$  Hz, 4H), 6.84 (s, 2H), 3.86 (d,  $J = 3.9$  Hz, 1H), 3.15 (dd,  $J = 16.5, 6.5$  Hz, 1H), 2.91 – 2.79 (m, 1H), 2.46 (s, 3H), 2.42 (s, 3H);  $^{13}C$  NMR (100 MHz,  $CDCl_3$ )  $\delta$  192.1, 169.5, 145.2, 139.9, 138.0, 137.8, 136.0, 135.5, 134.4, 131.9, 131.7, 131.3, 129.8, 129.4, 129.1, 128.0, 127.9, 127.7, 127.4, 125.0, 45.1, 41.5, 21.7, 21.0. HRMS (FTMS-APCI):  $[M + H]^+$  calcd for  $C_{32}H_{28}NO_4S^+$ : 522.1734; found: 522.1738.

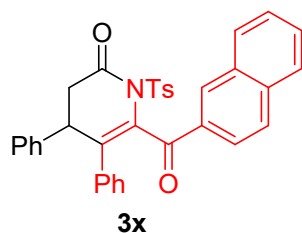

**6-(2-naphthoyl)-4,5-diphenyl-1-tosyl-3,4-dihydropyridin-2(1H)-one 3x:** white solid,  $^1\text{H}$  NMR (400 MHz,  $\text{CDCl}_3$ )  $\delta$  8.39 (s, 1H), 7.98 (d,  $J = 7.9$  Hz, 2H), 7.89 (d,  $J = 8.6$  Hz, 1H), 7.78 (d,  $J = 8.0$  Hz, 1H), 7.69 (d,  $J = 8.0$  Hz, 1H), 7.62 (d,  $J = 8.6$  Hz, 1H), 7.55 (d,  $J = 7.4$  Hz, 2H), 7.48 (t,  $J = 7.5$  Hz, 3H), 7.43 (d,  $J = 7.8$  Hz, 1H), 7.39 (d,  $J = 8.2$  Hz, 1H), 7.29 (d,  $J = 8.0$  Hz, 2H), 6.91 (d,  $J = 7.6$  Hz, 2H), 6.81 (dt,  $J = 13.6, 7.1$  Hz, 3H), 3.96 (d,  $J = 4.1$  Hz, 1H), 3.20 (dd,  $J = 16.5, 6.4$  Hz, 1H), 2.88 (d,  $J = 16.5$  Hz, 1H), 2.41 (s, 3H);  $^{13}\text{C}$  NMR (100 MHz,  $\text{CDCl}_3$ )  $\delta$  191.4, 169.3, 145.3, 138.4, 137.7, 135.4, 135.3, 134.1, 133.8, 132.9, 132.1, 132.0, 129.7, 129.6, 129.2, 128.3, 128.2, 128.1, 127.8, 127.7, 127.6, 126.4, 125.2, 45.0, 41.8, 21.7. HRMS (FTMS-APCI):  $[\text{M} + \text{H}]^+$  calcd for  $\text{C}_{35}\text{H}_{28}\text{NO}_4\text{S}^+$ : 558.1734; found: 558.1736.

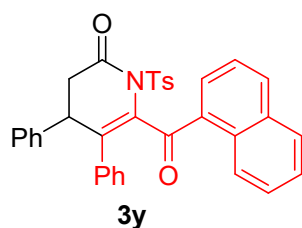

**6-(1-naphthoyl)-4,5-diphenyl-1-tosyl-3,4-dihydropyridin-2(1H)-one 3y:** white solid,  $^1\text{H}$  NMR (400 MHz,  $\text{CDCl}_3$ )  $\delta$  8.71 (d,  $J = 8.6$  Hz, 1H), 8.16 (d,  $J = 7.2$  Hz, 1H), 8.00 (d,  $J = 7.9$  Hz, 2H), 7.72 (dd,  $J = 14.8, 8.2$  Hz, 2H), 7.57 (t,  $J = 7.7$  Hz, 1H), 7.52 – 7.41 (m, 5H), 7.36 (t,  $J = 6.9$  Hz, 1H), 7.29 (t,  $J = 6.4$  Hz, 3H), 6.79 (s, 2H), 6.64 (s, 3H), 3.91 (d,  $J = 3.1$  Hz, 1H), 3.20 (dd,  $J = 16.6, 6.4$  Hz, 1H), 2.91 (d,  $J = 16.5$  Hz, 1H), 2.42 (s, 3H);  $^{13}\text{C}$  NMR (100 MHz,  $\text{CDCl}_3$ )  $\delta$  192.1, 169.6, 145.3, 138.0, 137.7, 136.2, 135.8, 135.5, 133.8, 133.4, 133.2, 131.8, 130.9, 129.9, 129.4, 129.1, 128.2, 128.0, 127.8, 127.74, 127.71, 127.3, 126.1, 125.5, 123.9, 45.2, 41.7, 21.7. HRMS (FTMS-APCI):  $[\text{M} + \text{H}]^+$  calcd for  $\text{C}_{35}\text{H}_{28}\text{NO}_4\text{S}^+$ : 558.1734; found: 558.1736.

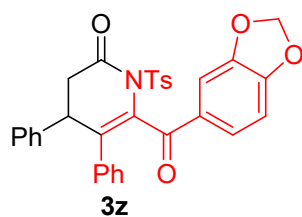

**6-(benzo[d][1,3]dioxole-5-carbonyl)-4,5-diphenyl-1-tosyl-3,4-dihydropyridin-2(1H)-one 3z:** white solid,  $^1\text{H}$  NMR (400 MHz,  $\text{CDCl}_3$ )  $\delta$  7.97 (d,  $J = 7.9$  Hz, 2H), 7.46 (dd,  $J = 18.3, 7.9$  Hz, 5H), 7.33 (dd,  $J = 21.7, 7.3$  Hz, 4H), 7.01 (d,  $J = 4.8$  Hz, 3H), 6.91 (s, 2H), 6.58 (d,  $J = 8.1$  Hz, 1H), 5.90 (d,  $J = 8.0$  Hz, 2H), 3.91 (d,  $J = 4.3$  Hz, 1H), 3.15 (dd,  $J = 16.4, 6.4$  Hz, 1H), 2.82 (d,  $J = 16.4$  Hz, 1H), 2.42 (s, 3H);  $^{13}\text{C}$  NMR (100 MHz,  $\text{CDCl}_3$ )  $\delta$  189.50, 169.20, 151.4, 147.4, 145.3, 138.4, 137.9, 135.4, 133.6, 132.3, 131.5, 129.7, 129.5, 129.1, 128.2, 128.1, 128.0, 127.6, 109.2, 107.6, 101.7, 45.0, 41.7, 21.7. HRMS (FTMS-APCI):  $[\text{M} + \text{H}]^+$  calcd for  $\text{C}_{32}\text{H}_{26}\text{NO}_6\text{S}^+$ : 552.1475; found: 552.1476.

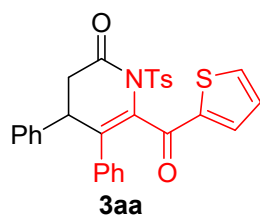

**4,5-diphenyl-6-(thiophene-2-carbonyl)-1-tosyl-3,4-dihydropyridin-2(1H)-one 3aa:** white solid,  $^1\text{H}$  NMR (400 MHz,  $\text{CDCl}_3$ )  $\delta$  7.97 (d,  $J$  = 8.0 Hz, 2H), 7.55 (d,  $J$  = 3.1 Hz, 1H), 7.51 (d,  $J$  = 7.2 Hz, 2H), 7.44 (dd,  $J$  = 12.7, 5.8 Hz, 3H), 7.37 (d,  $J$  = 7.0 Hz, 1H), 7.30 (d,  $J$  = 8.0 Hz, 2H), 7.03 (d,  $J$  = 6.7 Hz, 5H), 6.81 (t,  $J$  = 3.9 Hz, 1H), 3.96 (d,  $J$  = 4.8 Hz, 1H), 3.16 (dd,  $J$  = 16.5, 6.3 Hz, 1H), 2.85 (d,  $J$  = 16.5 Hz, 1H), 2.42 (s, 3H);  $^{13}\text{C}$  NMR (100 MHz,  $\text{CDCl}_3$ )  $\delta$  183.3, 169.1, 145.3, 143.7, 138.12, 138.05, 135.3, 134.7, 133.9, 133.8, 132.8, 129.6, 129.5, 129.2, 128.4, 128.2, 128.0, 127.63, 127.57, 44.9, 41.7, 21.7. HRMS (FTMS-APCI):  $[\text{M} + \text{H}]^+$  calcd for  $\text{C}_{29}\text{H}_{24}\text{NO}_4\text{S}^+$ : 514.1141; found: 514.1147.

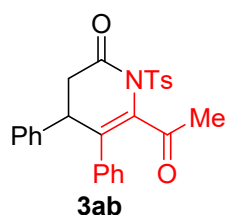

**6-acetyl-4,5-diphenyl-1-tosyl-3,4-dihydropyridin-2(1H)-one 3ab:** white solid,  $^1\text{H}$  NMR (400 MHz,  $\text{CDCl}_3$ )  $\delta$  7.94 (d,  $J$  = 8.0 Hz, 2H), 7.34 (dt,  $J$  = 10.8, 8.6 Hz, 10H), 7.09 (d,  $J$  = 6.9 Hz, 2H), 3.86 (d,  $J$  = 3.2 Hz, 1H), 3.06 (dd,  $J$  = 16.5, 6.3 Hz, 1H), 2.81 (dd,  $J$  = 16.5, 1.9 Hz, 1H), 2.42 (s, 3H), 2.05 (s, 3H);  $^{13}\text{C}$  NMR (100 MHz,  $\text{CDCl}_3$ )  $\delta$  198.6, 169.2, 145.4, 137.7, 137.6, 136.1, 135.4, 131.5, 129.6, 129.3, 129.2, 128.93, 128.90, 127.9, 127.64, 127.62, 44.5, 41.6, 30.7, 21.7. HRMS (FTMS-APCI):  $[\text{M} + \text{H}]^+$  calcd for  $\text{C}_{26}\text{H}_{24}\text{NO}_4\text{S}^+$ : 446.1421; found: 446.1422.

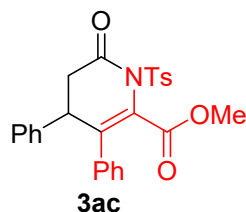

**methyl 6-oxo-3,4-diphenyl-1-tosyl-1,4,5,6-tetrahydropyridine-2-carboxylate 3ac:** white solid,  $^1\text{H}$  NMR (400 MHz,  $\text{CDCl}_3$ )  $\delta$  7.97 (d,  $J$  = 8.0 Hz, 2H), 7.38 – 7.26 (m, 10H), 7.13 (s, 2H), 3.87 (d,  $J$  = 5.5 Hz, 1H), 3.60 (s, 3H), 3.10 (dd,  $J$  = 16.4, 6.3 Hz, 1H), 2.83 (d,  $J$  = 16.4 Hz, 1H), 2.41 (s, 3H);  $^{13}\text{C}$  NMR (100 MHz,  $\text{CDCl}_3$ )  $\delta$  168.7, 164.4, 145.3, 138.1, 137.5, 135.4, 134.2, 129.7, 129.2, 129.1, 128.8, 128.3, 127.8, 127.5, 127.1, 52.4, 44.3, 41.1, 21.7. HRMS (FTMS-APCI):  $[\text{M} + \text{H}]^+$  calcd for  $\text{C}_{26}\text{H}_{24}\text{NO}_5\text{S}^+$ : 462.1370; found: 462.1372.

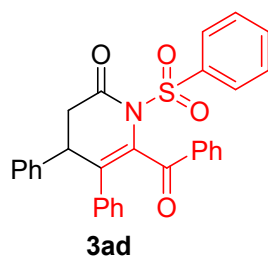

**6-benzoyl-4,5-diphenyl-1-(phenylsulfonyl)-3,4-dihydropyridin-2(1H)-one 3ad:** white solid,  $^1\text{H}$  NMR (400 MHz,  $\text{CDCl}_3$ )  $\delta$  8.08 (d,  $J = 7.9$  Hz, 2H), 7.85 (d,  $J = 7.7$  Hz, 2H), 7.60 (t,  $J = 7.3$  Hz, 1H), 7.53 – 7.42 (m, 6H), 7.35 (t,  $J = 7.0$  Hz, 1H), 7.28 (t,  $J = 7.2$  Hz, 1H), 7.18 (t,  $J = 7.5$  Hz, 2H), 6.98 – 6.84 (m, 5H), 3.92 (d,  $J = 4.8$  Hz, 1H), 3.16 (dd,  $J = 16.5, 6.4$  Hz, 1H), 2.85 (d,  $J = 16.5$  Hz, 1H);  $^{13}\text{C}$  NMR (100 MHz,  $\text{CDCl}_3$ )  $\delta$  191.6, 169.3, 138.4, 138.2, 137.6, 136.8, 134.2, 133.7, 133.1, 132.8, 129.9, 129.63, 129.55, 128.5, 128.20, 128.18, 128.1, 127.9, 127.8, 127.7, 45.0, 41.7. HRMS (FTMS-APCI):  $[\text{M} + \text{H}]^+$  calcd for  $\text{C}_{30}\text{H}_{24}\text{NO}_4\text{S}^+$ : 494.1421; found: 494.1425.

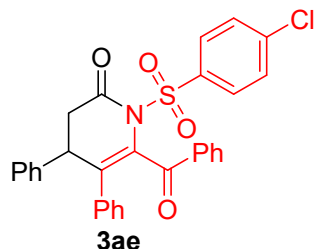

**6-benzoyl-1-((4-chlorophenyl)sulfonyl)-4,5-diphenyl-3,4-dihydropyridin-2(1H)-one 3ae:** white solid,  $^1\text{H}$  NMR (400 MHz,  $\text{CDCl}_3$ )  $\delta$  8.01 (d,  $J = 8.5$  Hz, 2H), 7.83 (d,  $J = 7.6$  Hz, 2H), 7.53 – 7.44 (m, 6H), 7.38 (t,  $J = 6.8$  Hz, 1H), 7.30 (t,  $J = 7.3$  Hz, 1H), 7.19 (t,  $J = 7.5$  Hz, 2H), 6.96 (d,  $J = 4.9$  Hz, 3H), 6.89 (d,  $J = 4.1$  Hz, 2H), 3.95 (d,  $J = 3.7$  Hz, 1H), 3.18 (dd,  $J = 16.6, 6.4$  Hz, 1H), 2.89 (dd,  $J = 16.6, 2.1$  Hz, 1H);  $^{13}\text{C}$  NMR (100 MHz,  $\text{CDCl}_3$ )  $\delta$  191.6, 169.4, 140.9, 138.1, 137.4, 136.7, 136.6, 133.6, 133.5, 132.8, 131.2, 129.8, 129.6, 128.8, 128.3, 128.2, 128.1, 127.9, 127.7, 127.6, 45.0, 41.7. HRMS (FTMS-APCI):  $[\text{M} + \text{H}]^+$  calcd for  $\text{C}_{30}\text{H}_{23}\text{ClNO}_4\text{S}^+$ : 528.1031; found: 528.1033.

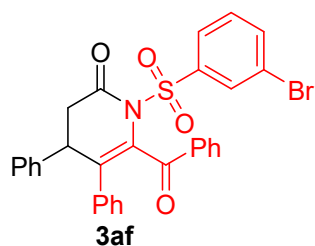

**6-benzoyl-1-((3-bromophenyl)sulfonyl)-4,5-diphenyl-3,4-dihydropyridin-2(1H)-one 3af** white solid,  $^1\text{H}$  NMR (400 MHz,  $\text{CDCl}_3$ )  $\delta$  8.25 (s, 1H), 8.01 (d,  $J = 8.0$  Hz, 1H), 7.84 (d,  $J = 7.8$  Hz, 2H), 7.73 (d,  $J = 7.9$  Hz, 1H), 7.48 (q,  $J = 7.8$  Hz, 4H), 7.37 (t,  $J = 7.7$  Hz, 2H), 7.30 (t,  $J = 7.2$  Hz, 1H), 7.19 (t,  $J = 7.5$  Hz, 2H), 7.00 – 6.86 (m, 5H), 3.96 (d,  $J = 4.3$  Hz, 1H), 3.19 (dd,  $J = 16.6, 6.3$  Hz, 1H), 2.94 – 2.82 (m, 1H).  $^{13}\text{C}$  NMR (100 MHz,  $\text{CDCl}_3$ )  $\delta$  191.5, 169.4, 140.0, 138.0, 137.4, 137.2, 136.6, 133.6, 133.4, 132.9, 132.4, 130.0, 129.8, 129.6, 128.3, 128.24, 128.20, 128.18, 128.0, 127.7, 127.6, 122.3, 45.0, 41.7. HRMS (FTMS-APCI):  $[\text{M} + \text{H}]^+$  calcd for  $\text{C}_{30}\text{H}_{23}\text{BrNO}_4\text{S}^+$ : 572.0526; found: 572.0527.

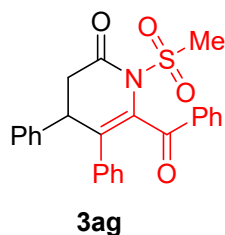

**6-benzoyl-1-(methylsulfonyl)-4,5-diphenyl-3,4-dihydropyridin-2(1H)-one 3ag:** white solid,  $^1\text{H}$  NMR (400 MHz,  $\text{CDCl}_3$ )  $\delta$  7.73 (d,  $J = 7.6$  Hz, 2H), 7.52 – 7.42 (m, 4H), 7.35 (t,  $J = 7.0$  Hz, 1H), 7.25

(t,  $J = 7.2$  Hz, 1H), 7.13 (t,  $J = 7.4$  Hz, 2H), 6.94 (d,  $J = 5.3$  Hz, 3H), 6.88 (s, 2H), 4.00 (s, 1H), 3.39 (s, 3H), 3.25 (dd,  $J = 17.3, 6.0$  Hz, 1H), 2.99 (d,  $J = 17.2$  Hz, 1H);  $^{13}\text{C}$  NMR (100 MHz,  $\text{CDCl}_3$ )  $\delta$  192.0, 170.6, 137.9, 137.2, 136.5, 134.5, 133.4, 132.9, 129.7, 129.6, 128.3, 128.2, 128.1, 127.9, 127.8, 127.6, 44.9, 43.1, 41.9. HRMS (FTMS-APCI):  $[\text{M} + \text{H}]^+$  calcd for  $\text{C}_{25}\text{H}_{22}\text{NO}_4\text{S}^+$ : 432.1264; found: 432.1268.

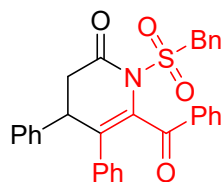

**3ah**

**6-benzoyl-1-(benzylsulfonyl)-4,5-diphenyl-3,4-dihydropyridin-2(1H)-one 3ah:** white solid,  $^1\text{H}$  NMR (400 MHz,  $\text{CDCl}_3$ )  $\delta$  7.74 (d,  $J = 7.6$  Hz, 2H), 7.48 (d,  $J = 7.4$  Hz, 2H), 7.42 (t,  $J = 7.6$  Hz, 2H), 7.38 (d,  $J = 6.6$  Hz, 2H), 7.33 (d,  $J = 9.9$  Hz, 4H), 7.25 (s, 1H), 7.13 (t,  $J = 7.5$  Hz, 2H), 6.94 (d,  $J = 4.9$  Hz, 3H), 6.88 (s, 2H), 5.03 (d,  $J = 13.2$  Hz, 1H), 4.77 (d,  $J = 13.1$  Hz, 1H), 4.01 (s, 1H), 3.27 (dd,  $J = 17.1, 6.1$  Hz, 1H), 3.04 (d,  $J = 17.1$  Hz, 1H);  $^{13}\text{C}$  NMR (100 MHz,  $\text{CDCl}_3$ )  $\delta$  192.0, 170.9, 137.9, 137.3, 136.7, 134.9, 133.6, 132.8, 131.6, 129.8, 129.5, 129.2, 128.8, 128.3, 128.2, 128.1, 127.9, 127.7, 126.2, 62.3, 44.9, 42.1. HRMS (FTMS-APCI):  $[\text{M} + \text{H}]^+$  calcd for  $\text{C}_{31}\text{H}_{26}\text{NO}_4\text{S}^+$ : 508.1577; found: 508.1578.

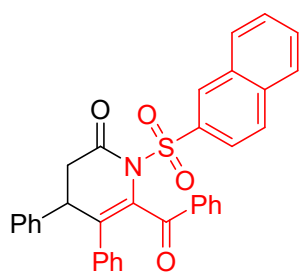

**3ai**

**6-benzoyl-1-(naphthalen-2-ylsulfonyl)-4,5-diphenyl-3,4-dihydropyridin-2(1H)-one 3ai:** white solid,  $^1\text{H}$  NMR (400 MHz,  $\text{CDCl}_3$ )  $\delta$  8.65 (s, 1H), 8.07 (d,  $J = 8.8$  Hz, 1H), 7.99 (d,  $J = 8.0$  Hz, 1H), 7.90 (dd,  $J = 17.4, 9.4$  Hz, 4H), 7.63 (t,  $J = 7.3$  Hz, 1H), 7.57 (t,  $J = 7.4$  Hz, 1H), 7.49 (d,  $J = 7.4$  Hz, 2H), 7.41 (t,  $J = 7.5$  Hz, 2H), 7.31 (dd,  $J = 16.1, 7.5$  Hz, 2H), 7.21 (t,  $J = 7.6$  Hz, 2H), 6.93 (dd,  $J = 16.8, 4.3$  Hz, 5H), 3.91 (d,  $J = 4.1$  Hz, 1H), 3.16 (dd,  $J = 16.5, 6.4$  Hz, 1H), 2.84 (dd,  $J = 16.4, 2.0$  Hz, 1H);  $^{13}\text{C}$  NMR (100 MHz,  $\text{CDCl}_3$ )  $\delta$  191.5, 169.3, 138.2, 137.6, 136.8, 135.6, 135.2, 133.7, 133.1, 132.8, 132.1, 131.8, 129.93, 129.89, 129.5, 128.6, 128.21, 128.19, 128.1, 128.0, 127.9, 127.8, 127.6, 127.3, 123.9, 45.0, 41.7. HRMS (FTMS-APCI):  $[\text{M} + \text{H}]^+$  calcd for  $\text{C}_{34}\text{H}_{26}\text{NO}_4\text{S}^+$ : 544.1577; found: 544.1580.

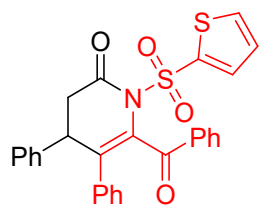

**3aj**

**6-benzoyl-4,5-diphenyl-1-(thiophen-2-ylsulfonyl)-3,4-dihydropyridin-2(1H)-one 3aj**, white solid,  $^1\text{H}$  NMR (400 MHz,  $\text{CDCl}_3$ )  $\delta$  7.85 (d,  $J = 3.3$  Hz, 1H), 7.81 (d,  $J = 7.7$  Hz, 2H), 7.69 (d,  $J = 4.9$  Hz, 1H), 7.45 (dt,  $J = 14.9, 7.4$  Hz, 4H), 7.34 (t,  $J = 7.0$  Hz, 1H), 7.28 (t,  $J = 7.3$  Hz, 1H), 7.18 (t,  $J = 7.5$  Hz, 2H), 7.07 (t,  $J = 4.1$  Hz, 1H), 6.99 – 6.92 (m, 3H), 6.89 (d,  $J = 4.7$  Hz, 2H), 3.95 (d,  $J = 5.4$  Hz, 1H), 3.22 (dd,  $J = 16.6, 6.3$  Hz, 1H), 2.91 (d,  $J = 16.6$  Hz, 1H);  $^{13}\text{C}$  NMR (100 MHz,  $\text{CDCl}_3$ )  $\delta$  191.0, 169.4, 138.3, 138.1, 137.4, 136.7, 136.5, 135.1, 133.6, 133.4, 132.8, 129.8, 129.5, 128.2, 128.0, 127.9, 127.7, 127.6, 126.9, 44.9, 41.8. HRMS (FTMS-APCI):  $[\text{M} + \text{H}]^+$  calcd for  $\text{C}_{28}\text{H}_{22}\text{NO}_4\text{S}_2^+$ : 500.0985; found: 500.0987.

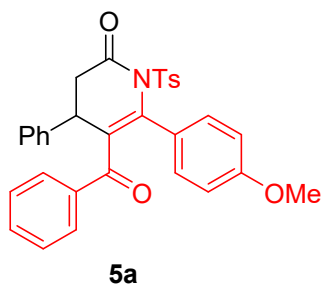

**5-benzoyl-6-(4-methoxyphenyl)-4-phenyl-1-tosyl-3,4-dihydropyridin-2(1H)-one 5a**, white solid,  $^1\text{H}$  NMR (400 MHz,  $\text{CDCl}_3$ )  $\delta$  7.94 (d,  $J = 7.9$  Hz, 2H), 7.85 (d,  $J = 7.5$  Hz, 2H), 7.53 – 7.42 (m, 4H), 7.36 (d,  $J = 7.0$  Hz, 1H), 7.31 (t,  $J = 7.9$  Hz, 3H), 7.21 (t,  $J = 7.4$  Hz, 2H), 6.82 (d,  $J = 8.0$  Hz, 2H), 6.47 (d,  $J = 8.1$  Hz, 2H), 3.90 (d,  $J = 5.2$  Hz, 1H), 3.60 (s, 3H), 3.16 (dd,  $J = 16.5, 6.3$  Hz, 1H), 2.85 (d,  $J = 16.4$  Hz, 1H), 2.42 (s, 3H);  $^{13}\text{C}$  NMR (100 MHz,  $\text{CDCl}_3$ )  $\delta$  191.8, 169.3, 159.3, 145.2, 138.4, 136.9, 135.4, 133.2, 132.8, 132.7, 129.9, 129.8, 129.7, 129.5, 129.2, 129.1, 128.0, 127.9, 127.6, 113.6, 55.2, 45.1, 41.7, 21.7. HRMS (FTMS-APCI):  $[\text{M} + \text{H}]^+$  calcd for  $\text{C}_{32}\text{H}_{28}\text{NO}_5\text{S}^+$ : 538.1683; found: 538.1684.

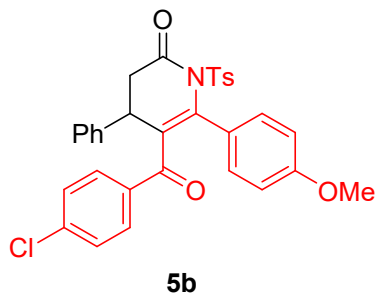

**5-(4-chlorobenzoyl)-6-(4-methoxyphenyl)-4-phenyl-1-tosyl-3,4-dihydropyridin-2(1H)-one 5b**, white solid,  $^1\text{H}$  NMR (400 MHz,  $\text{CDCl}_3$ )  $\delta$  7.94 (d,  $J = 7.7$  Hz, 2H), 7.78 (d,  $J = 7.7$  Hz, 2H), 7.50 – 7.42 (m, 4H), 7.36 (d,  $J = 5.8$  Hz, 1H), 7.30 (d,  $J = 7.8$  Hz, 2H), 7.18 (d,  $J = 7.8$  Hz, 2H), 6.80 (d,  $J = 7.8$  Hz, 2H), 6.51 (d,  $J = 7.8$  Hz, 2H), 3.93 – 3.88 (m, 1H), 3.63 (s, 3H), 3.15 (dd,  $J = 16.5, 6.3$  Hz, 1H), 2.84 (d,  $J = 16.5$  Hz, 1H), 2.42 (s, 3H);  $^{13}\text{C}$  NMR (100 MHz,  $\text{CDCl}_3$ )  $\delta$  190.7, 169.2, 159.5, 145.4, 138.9, 138.3, 135.30, 135.25, 133.0, 132.8, 131.0, 129.6, 129.5, 129.2, 128.3, 128.0, 127.6, 113.8, 55.2, 45.1, 41.7, 21.7. HRMS (FTMS-APCI):  $[\text{M} + \text{H}]^+$  calcd for  $\text{C}_{32}\text{H}_{27}\text{ClNO}_5\text{S}^+$ : 572.1293; found: 572.1297.

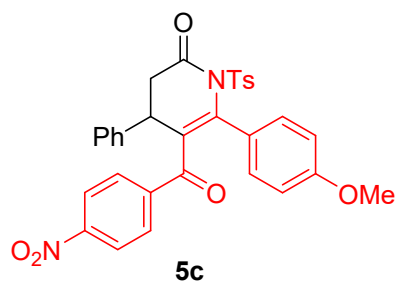

**6-(4-methoxyphenyl)-5-(4-nitrobenzoyl)-4-phenyl-1-tosyl-3,4-dihydropyridin-2(1H)-one 5c**, white solid,  $^1\text{H}$  NMR (400 MHz,  $\text{CDCl}_3$ )  $\delta$  7.94 (d,  $J = 7.7$  Hz, 2H), 7.78 (d,  $J = 7.7$  Hz, 2H), 7.50 – 7.42 (m, 4H), 7.36 (d,  $J = 5.8$  Hz, 1H), 7.30 (d,  $J = 7.8$  Hz, 2H), 7.18 (d,  $J = 7.8$  Hz, 2H), 6.80 (d,  $J = 7.8$  Hz, 2H), 6.51 (d,  $J = 7.8$  Hz, 2H), 3.93 – 3.88 (m, 1H), 3.63 (s, 3H), 3.15 (dd,  $J = 16.5$ , 6.3 Hz, 1H), 2.84 (d,  $J = 16.5$  Hz, 1H), 2.42 (s, 3H);  $^{13}\text{C}$  NMR (100 MHz,  $\text{CDCl}_3$ )  $\delta$  190.7, 169.2, 159.5, 145.4, 138.9, 138.3, 135.30, 135.25, 133.0, 132.8, 131.0, 129.6, 129.5, 129.2, 128.3, 128.0, 127.6, 113.8, 55.2, 45.1, 41.7, 21.7. HRMS (FTMS-APCI):  $[\text{M} + \text{H}]^+$  calcd for  $\text{C}_{32}\text{H}_{27}\text{N}_2\text{O}_7\text{S}^+$ : 583.1533; found: 583.1534.

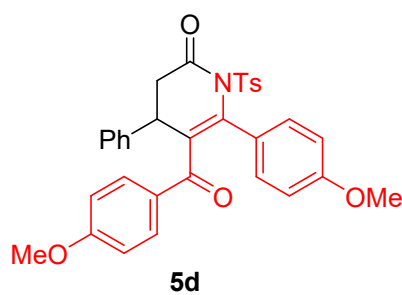

**5-(4-methoxybenzoyl)-6-(4-methoxyphenyl)-4-phenyl-1-tosyl-3,4-dihydropyridin-2(1H)-one 5d**, white solid,  $^1\text{H}$  NMR (400 MHz,  $\text{CDCl}_3$ )  $\delta$  7.95 (d,  $J = 7.9$  Hz, 2H), 7.85 (d,  $J = 8.3$  Hz, 2H), 7.49 (d,  $J = 7.4$  Hz, 2H), 7.44 (t,  $J = 7.4$  Hz, 2H), 7.35 (t,  $J = 7.4$  Hz, 1H), 7.28 (d,  $J = 7.9$  Hz, 2H), 6.86 (d,  $J = 8.2$  Hz, 2H), 6.70 (d,  $J = 8.3$  Hz, 2H), 6.50 (d,  $J = 8.2$  Hz, 2H), 3.88 (d,  $J = 4.9$  Hz, 1H), 3.74 (s, 3H), 3.61 (s, 3H), 3.15 (dd,  $J = 16.5$ , 6.4 Hz, 1H), 2.83 (d,  $J = 16.4$  Hz, 1H), 2.41 (s, 3H);  $^{13}\text{C}$  NMR (100 MHz,  $\text{CDCl}_3$ )  $\delta$  190.2, 169.4, 163.1, 159.2, 145.2, 138.5, 135.5, 133.2, 132.1, 132.0, 130.2, 129.9, 129.6, 129.5, 129.1, 127.9, 127.6, 113.6, 113.3, 55.4, 55.2, 45.1, 41.7, 21.7. HRMS (FTMS-APCI):  $[\text{M} + \text{H}]^+$  calcd for  $\text{C}_{33}\text{H}_{30}\text{NO}_6\text{S}^+$ : 568.1788; found: 568.1791.

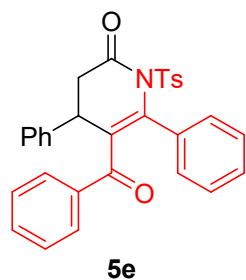

**5-benzoyl-4,6-diphenyl-1-tosyl-3,4-dihydropyridin-2(1H)-one 5e**, white solid,  $^1\text{H}$  NMR (400 MHz,  $\text{CDCl}_3$ )  $\delta$  7.96 (d,  $J = 7.8$  Hz, 2H), 7.84 (d,  $J = 7.7$  Hz, 2H), 7.53 – 7.43 (m, 4H), 7.36 (t,  $J = 7.3$  Hz, 1H), 7.33 – 7.26 (m, 3H), 7.19 (t,  $J = 7.5$  Hz, 2H), 6.95 (d,  $J = 4.8$  Hz, 3H), 6.89 (s, 2H), 3.93 (d,  $J = 5.4$  Hz, 1H), 3.17 (dd,  $J = 16.4$ , 6.4 Hz, 1H), 2.85 (d,  $J = 16.4$  Hz, 1H), 2.43 (s, 3H);  $^{13}\text{C}$  NMR (100 MHz,  $\text{CDCl}_3$ )  $\delta$  191.5, 169.2, 145.3, 138.3, 137.6, 136.8, 135.3, 133.8, 132.9, 132.7, 129.9, 129.7,

129.5, 129.2, 128.2, 128.1, 128.0, 127.9, 127.74, 127.65, 45.0, 41.8, 21.7. HRMS (FTMS-APCI):  $[M + H]^+$  calcd for  $C_{31}H_{26}NO_4S^+$ : 508.1577; found: 508.1579.

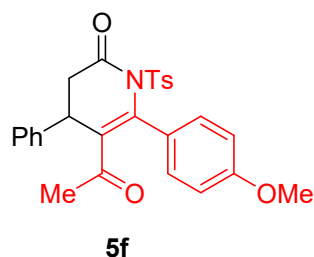

**5-acetyl-6-(4-methoxyphenyl)-4-phenyl-1-tosyl-3,4-dihydropyridin-2(1H)-one 5f**, white solid,  $^1H$  NMR (400 MHz,  $CDCl_3$ )  $\delta$  7.92 (d,  $J = 7.9$  Hz, 2H), 7.40 – 7.27 (m, 7H), 7.02 (d,  $J = 8.0$  Hz, 2H), 6.83 (d,  $J = 8.0$  Hz, 2H), 3.84 (s, 1H), 3.79 (s, 3H), 3.05 (dd,  $J = 16.5, 6.2$  Hz, 1H), 2.81 (d,  $J = 16.5$  Hz, 1H), 2.42 (s, 3H), 2.09 (s, 3H);  $^{13}C$  NMR (100 MHz,  $CDCl_3$ )  $\delta$  198.9, 169.3, 160.1, 145.3, 137.8, 135.6, 135.4, 131.5, 129.6, 129.5, 129.3, 129.2, 129.1, 127.9, 127.6, 114.3, 55.3, 44.6, 41.6, 30.7, 21.7. HRMS (FTMS-APCI):  $[M + H]^+$  calcd for  $C_{27}H_{26}NO_5S^+$ : 476.1526; found: 476.1528.

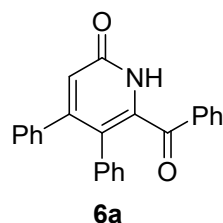

**6-benzoyl-4,5-diphenylpyridin-2(1H)-one 6a**, white solid,  $^1H$  NMR (400 MHz,  $CDCl_3$ )  $\delta$  7.57 (d,  $J = 7.7$  Hz, 2H), 7.34 (t,  $J = 7.4$  Hz, 1H), 7.20 (dq,  $J = 14.1, 7.1$  Hz, 5H), 7.01 (d,  $J = 7.5$  Hz, 2H), 6.94 – 6.86 (m, 3H), 6.84 – 6.76 (m, 3H);  $^{13}C$  NMR (100 MHz,  $CDCl_3$ )  $\delta$  191.9, 162.6, 155.0, 141.2, 137.7, 135.4, 134.2, 133.5, 131.3, 129.6, 128.9, 128.21, 128.15, 128.0, 127.8, 127.5, 122.6, 121.4. HRMS (FTMS-APCI):  $[M + H]^+$  calcd for  $C_{24}H_{18}NO_2^+$ : 352.1332; found: 352.1328.

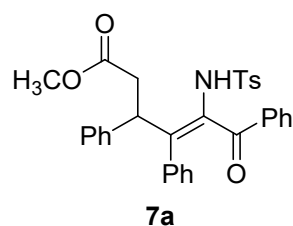

**methyl(E)-5-((4-methylphenyl)sulfonamido)-6-oxo-3,4,6-triphenylhex-4-enoate 7a**, white solid,  $^1H$  NMR (400 MHz,  $CDCl_3$ )  $\delta$  8.44 (s, 1H), 7.83 (d,  $J = 7.9$  Hz, 2H), 7.61 (d,  $J = 7.6$  Hz, 2H), 7.32 (dd,  $J = 14.6, 7.6$  Hz, 3H), 7.21 (t,  $J = 7.2$  Hz, 3H), 7.14 (t,  $J = 7.4$  Hz, 2H), 6.97 (t,  $J = 7.3$  Hz, 1H), 6.82 (t,  $J = 7.5$  Hz, 2H), 6.55 (d,  $J = 7.5$  Hz, 2H), 6.16 (d,  $J = 6.9$  Hz, 2H), 4.77 (t,  $J = 7.5$  Hz, 1H), 3.85 (s, 3H), 2.76 (d,  $J = 7.4$  Hz, 2H), 2.46 (s, 3H);  $^{13}C$  NMR (100 MHz,  $CDCl_3$ )  $\delta$  192.8, 174.4, 143.7, 141.7, 138.3, 137.5, 137.4, 134.0, 132.2, 131.0, 130.5, 129.8, 129.2, 128.5, 128.2, 127.8, 127.7, 127.6, 127.3, 127.1, 52.7, 41.2, 35.4, 21.6. HRMS (FTMS-APCI):  $[M + H]^+$  calcd for  $C_{32}H_{30}NO_5S^+$ : 540.1839; found: 540.1833.

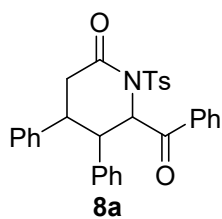

**6-benzoyl-4,5-diphenyl-1-tosylpiperidin-2-one 8a**, white solid,  $^1\text{H}$  NMR (400 MHz,  $\text{CDCl}_3$ )  $\delta$  8.51 (s, 1H), 7.86 (d,  $J = 7.6$  Hz, 2H), 7.65 (d,  $J = 7.7$  Hz, 2H), 7.35 (t,  $J = 7.9$  Hz, 3H), 7.24 (s, 2H), 7.17 (t,  $J = 7.0$  Hz, 2H), 7.00 (t,  $J = 7.2$  Hz, 1H), 6.85 (t,  $J = 7.3$  Hz, 2H), 6.57 (d,  $J = 7.4$  Hz, 2H), 6.20 (d,  $J = 6.5$  Hz, 2H), 4.78 (t,  $J = 7.4$  Hz, 1H), 4.44 – 4.29 (m, 2H), 2.78 (d,  $J = 7.1$  Hz, 2H), 2.50 (s, 3H);  $^{13}\text{C}$  NMR (100 MHz,  $\text{CDCl}_3$ )  $\delta$  192.8, 173.9, 143.6, 141.7, 138.4, 137.5, 134.0, 132.2, 131.0, 130.5, 129.7, 129.2, 128.5, 128.1, 127.8, 127.6, 127.3, 127.0, 61.7, 41.2, 35.7, 21.6. HRMS (FTMS-APCI):  $[\text{M} + \text{H}]^+$  calcd for  $\text{C}_{31}\text{H}_{28}\text{NO}_4\text{S}^+$ : 510.1734; found: 510.1731.

## 6. The NMR of 2a', 3, 5, 6a, 7a, 8a

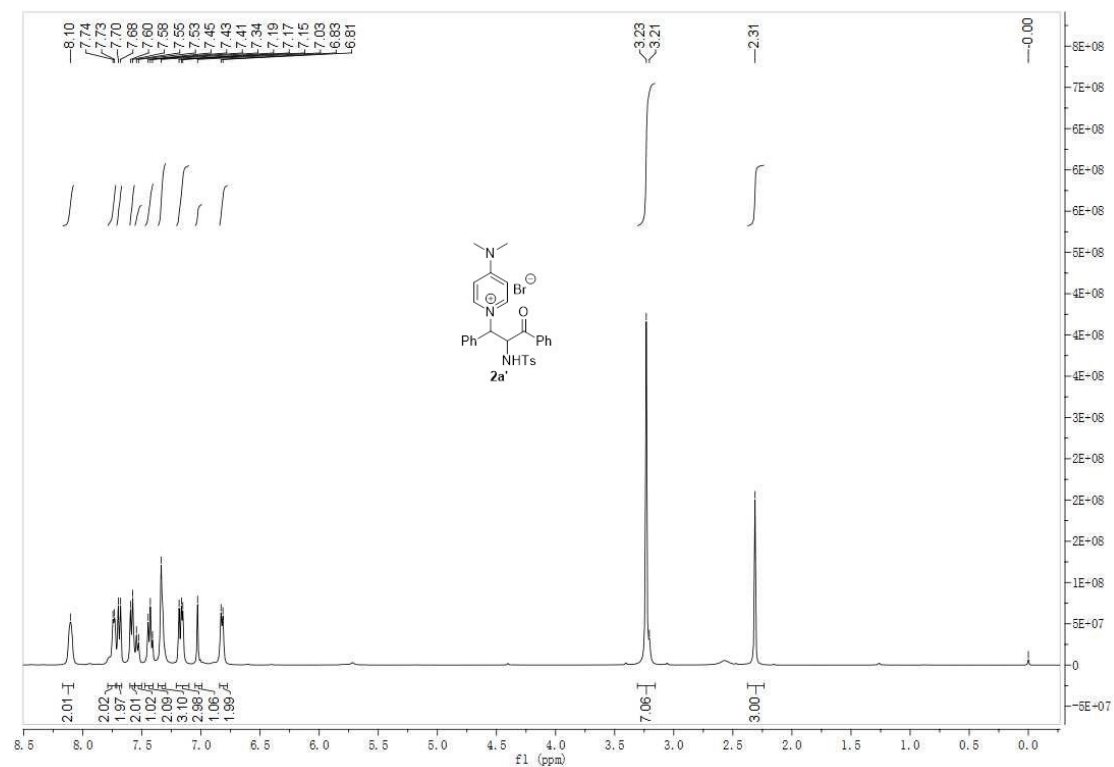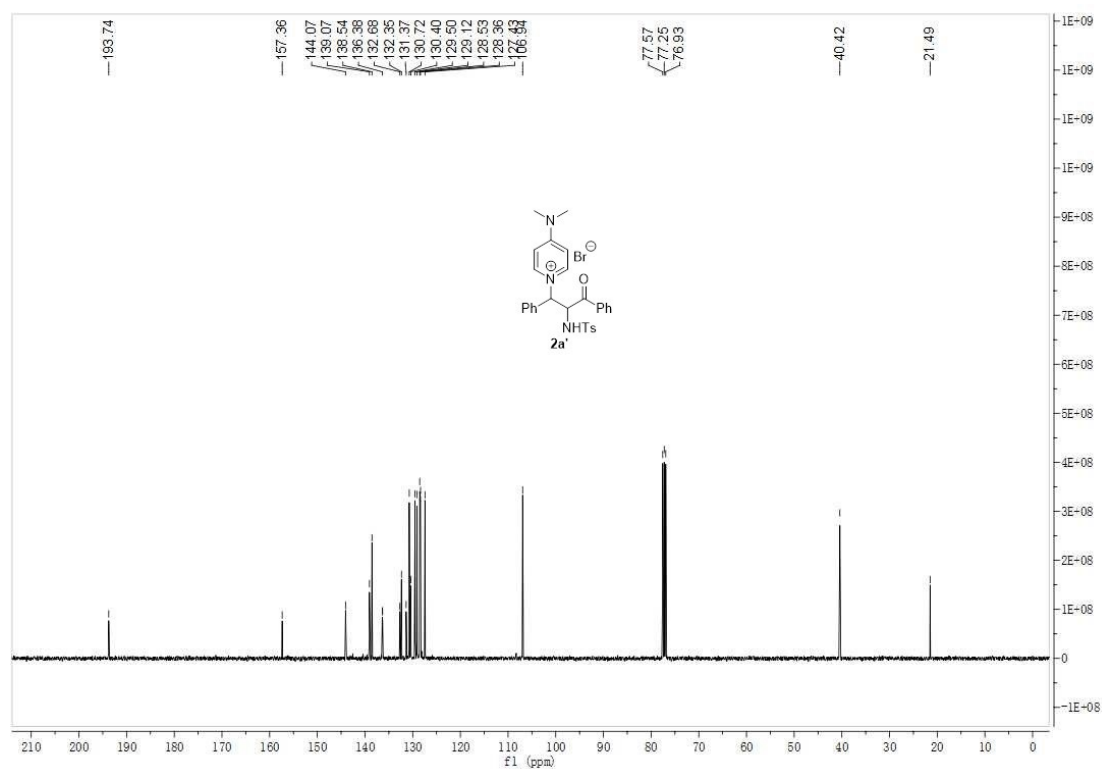

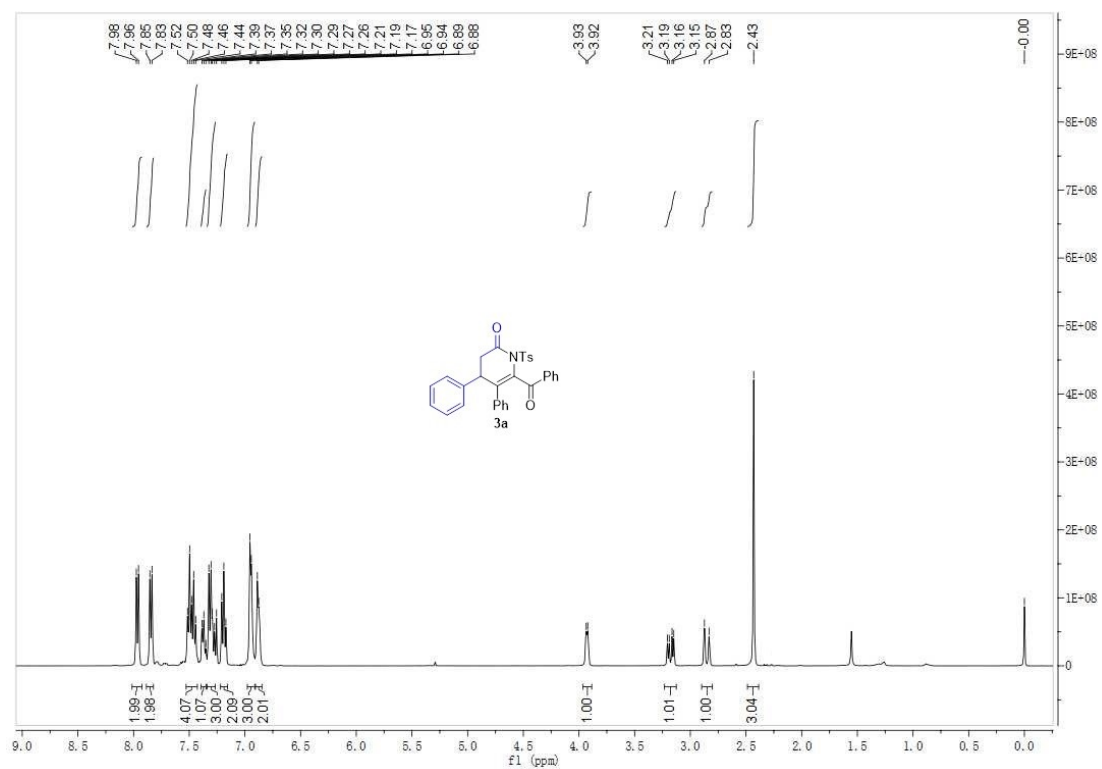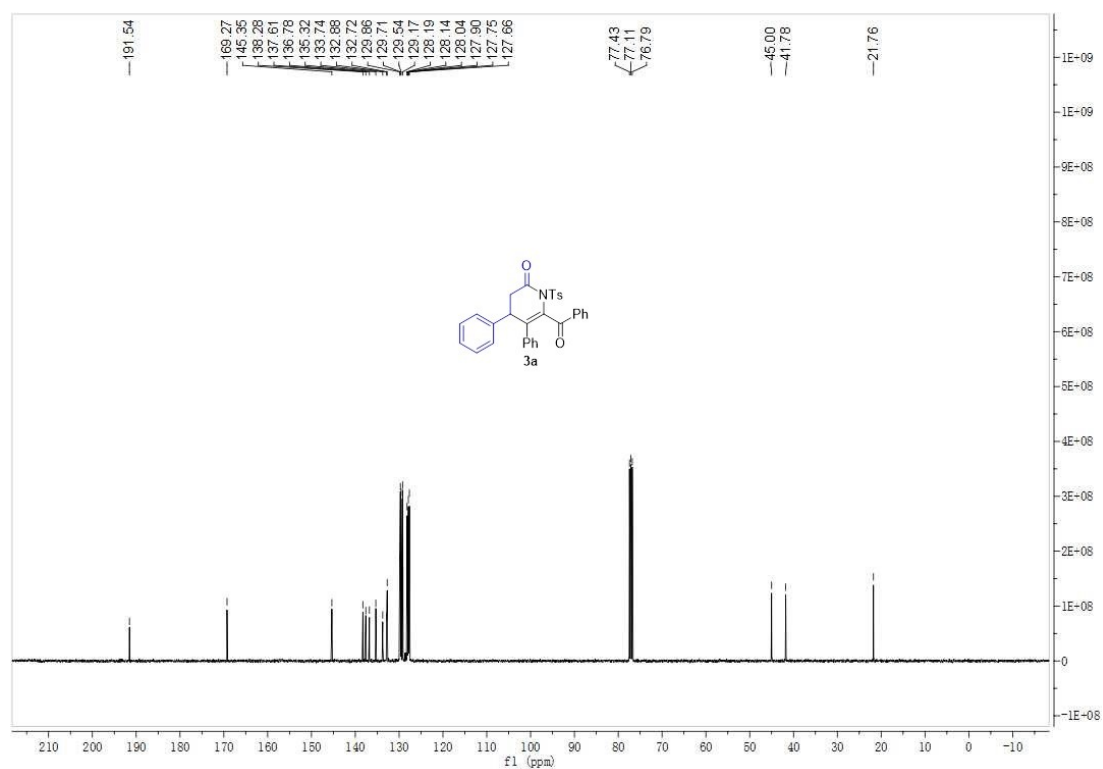

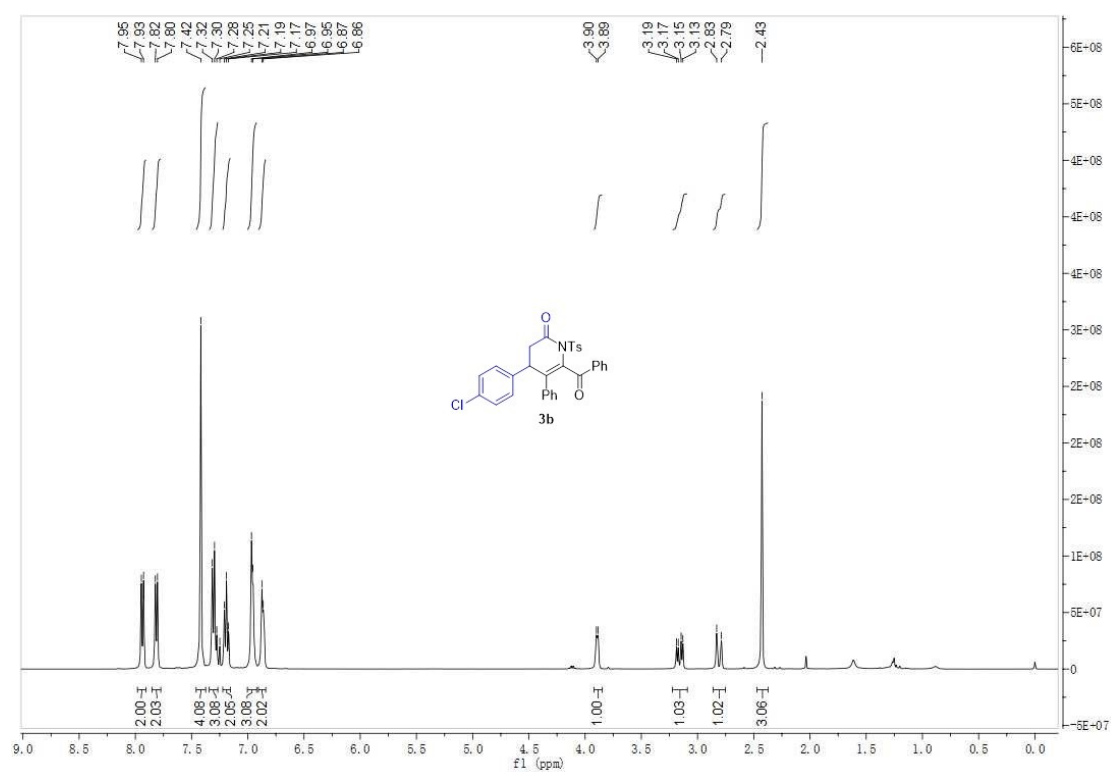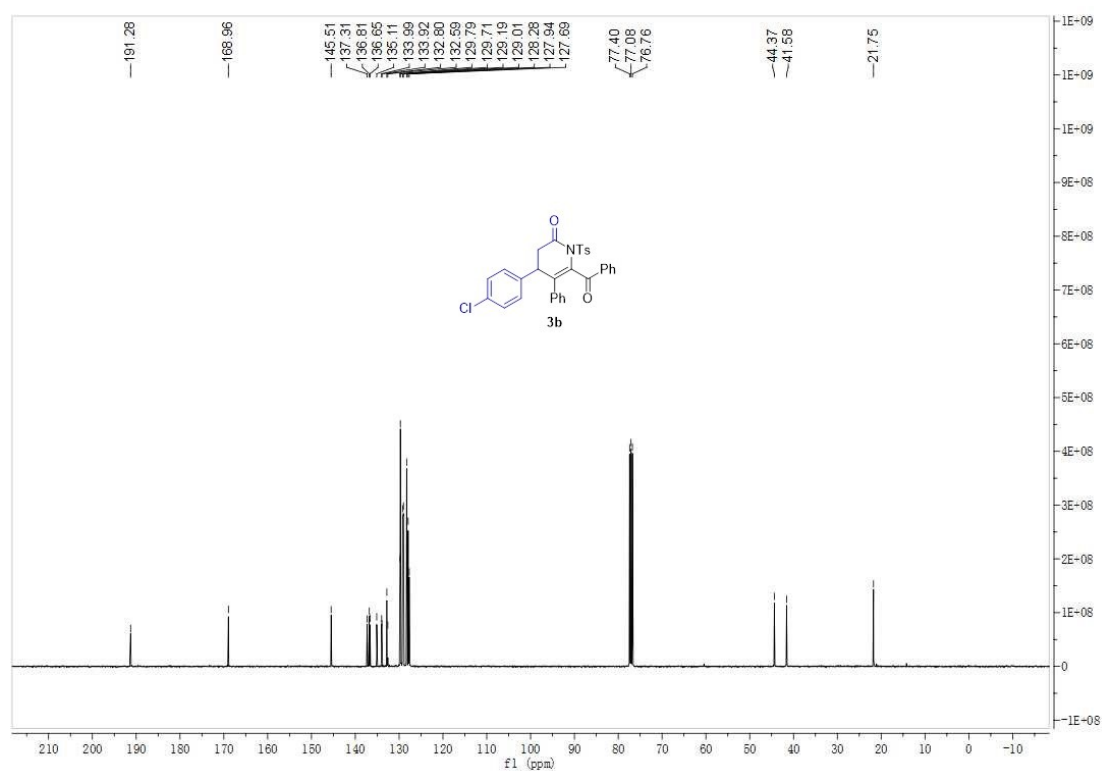

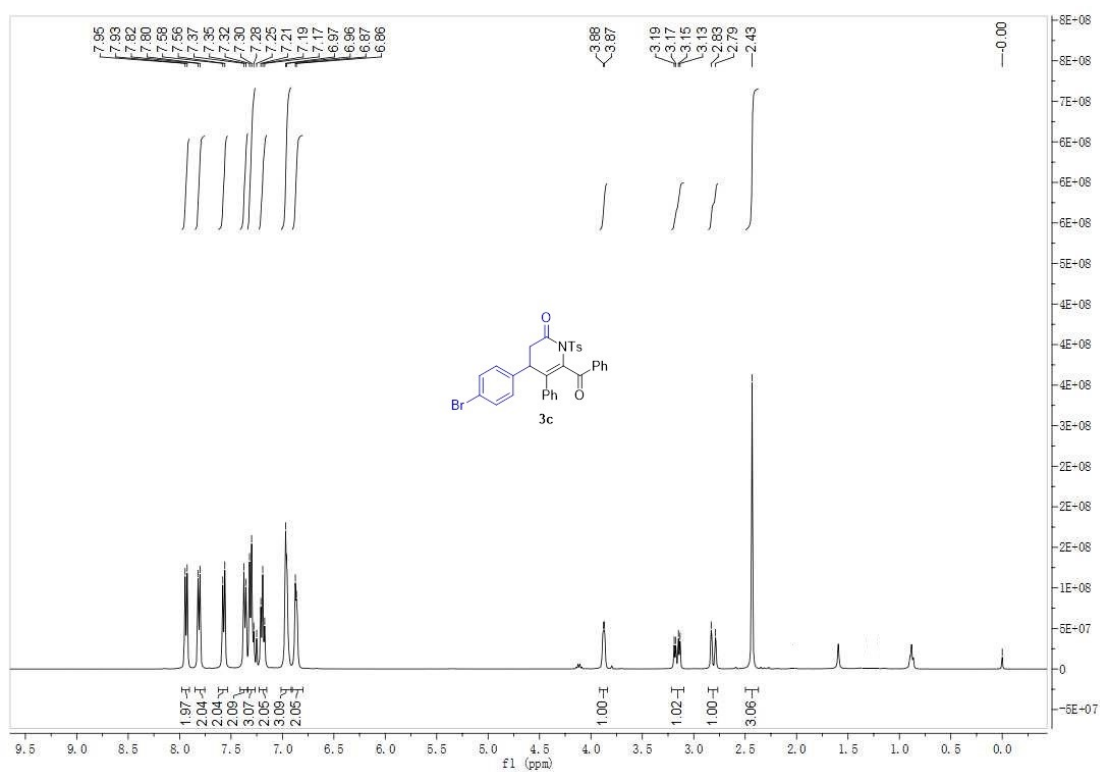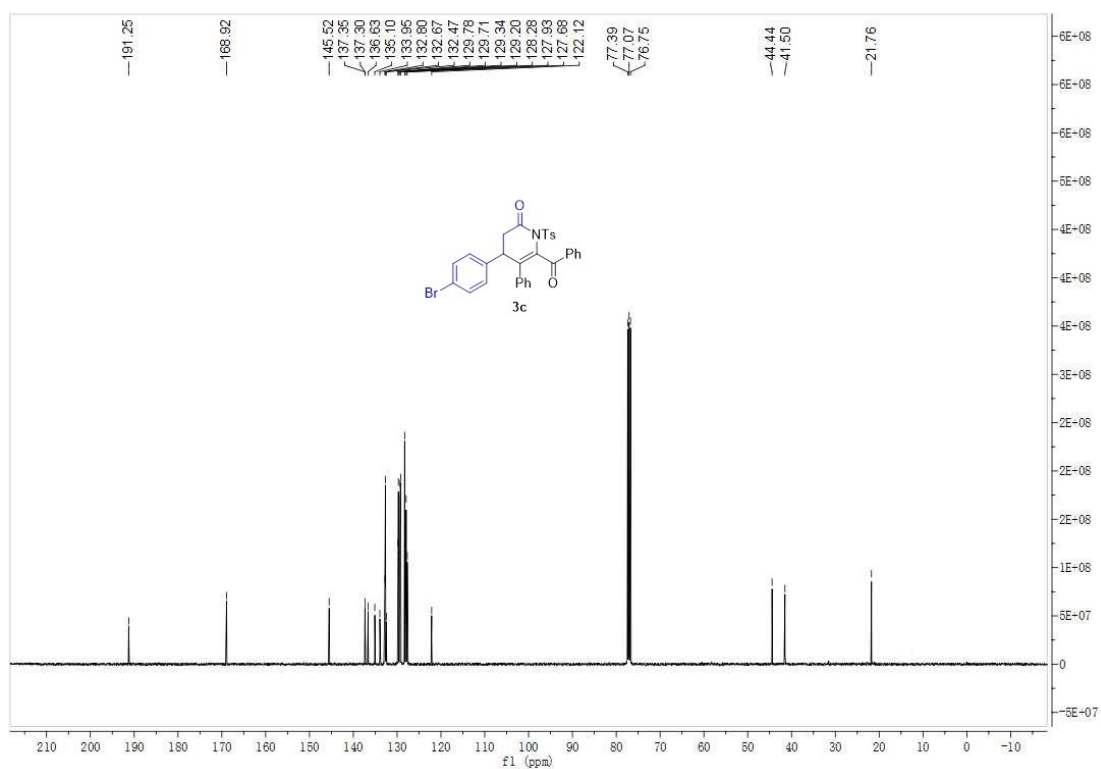

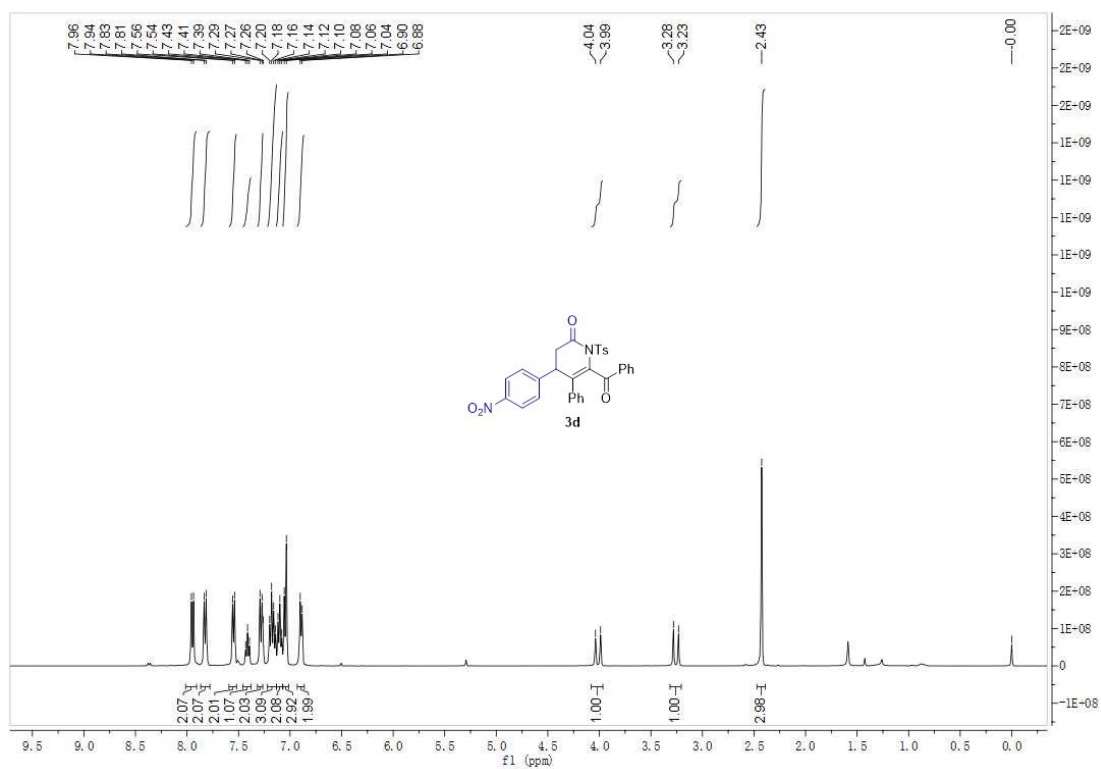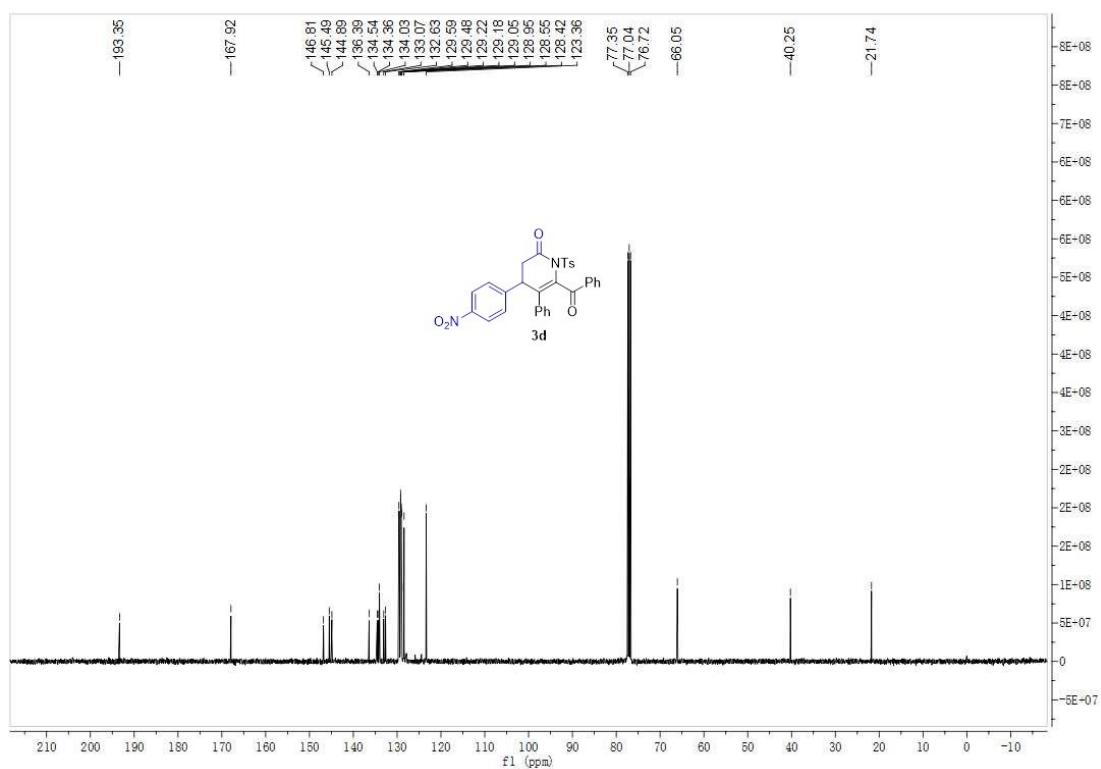

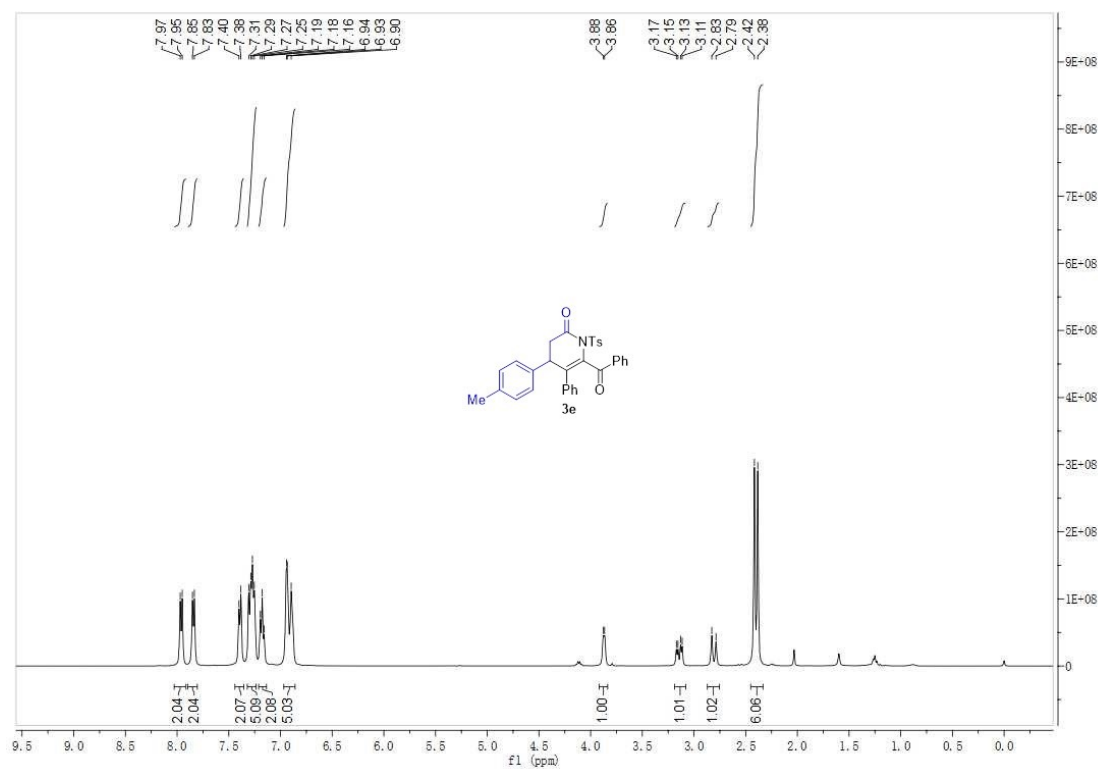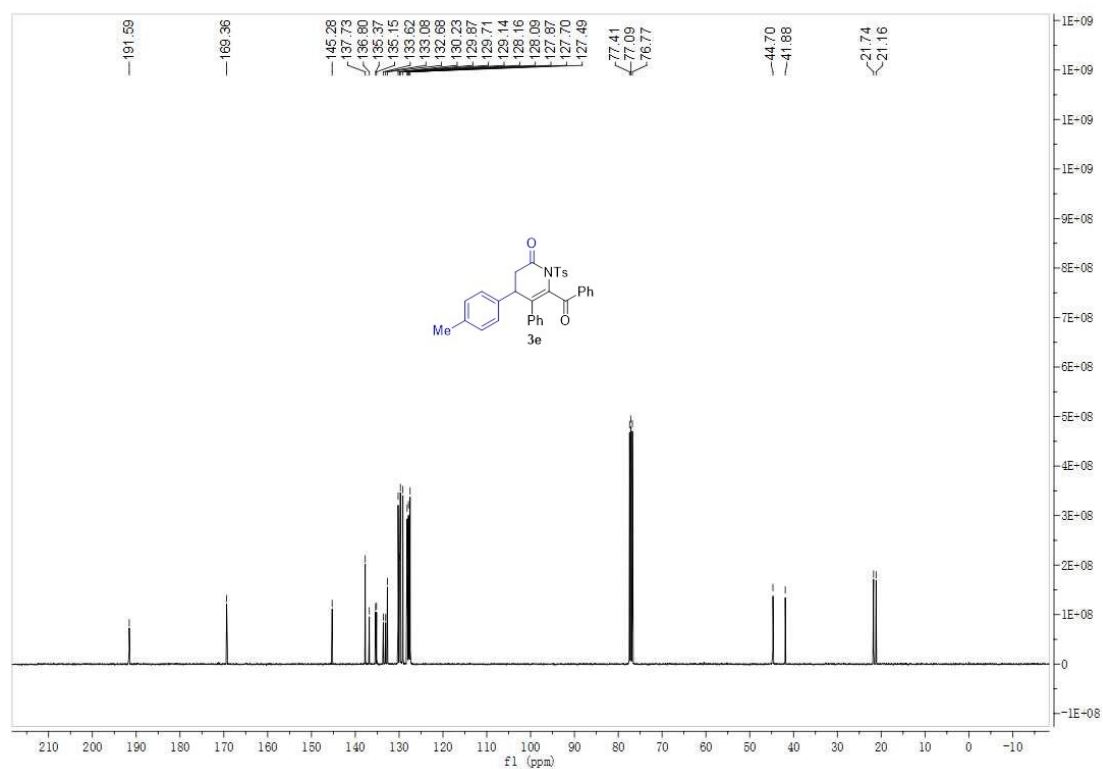

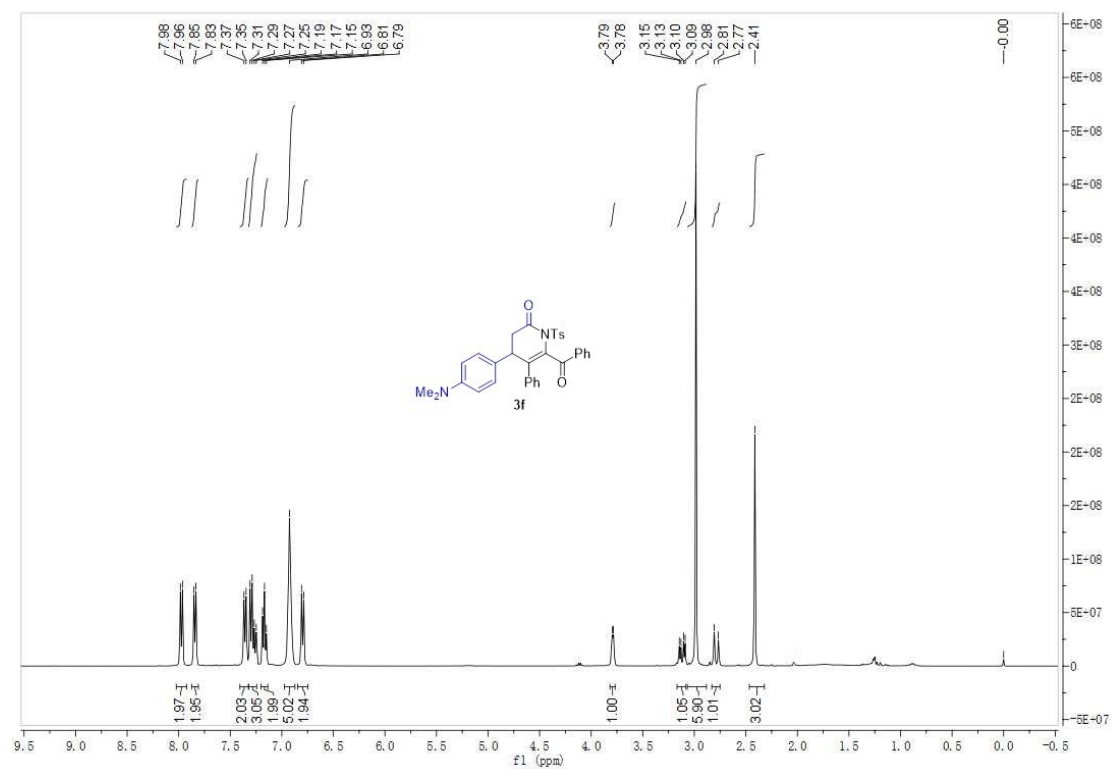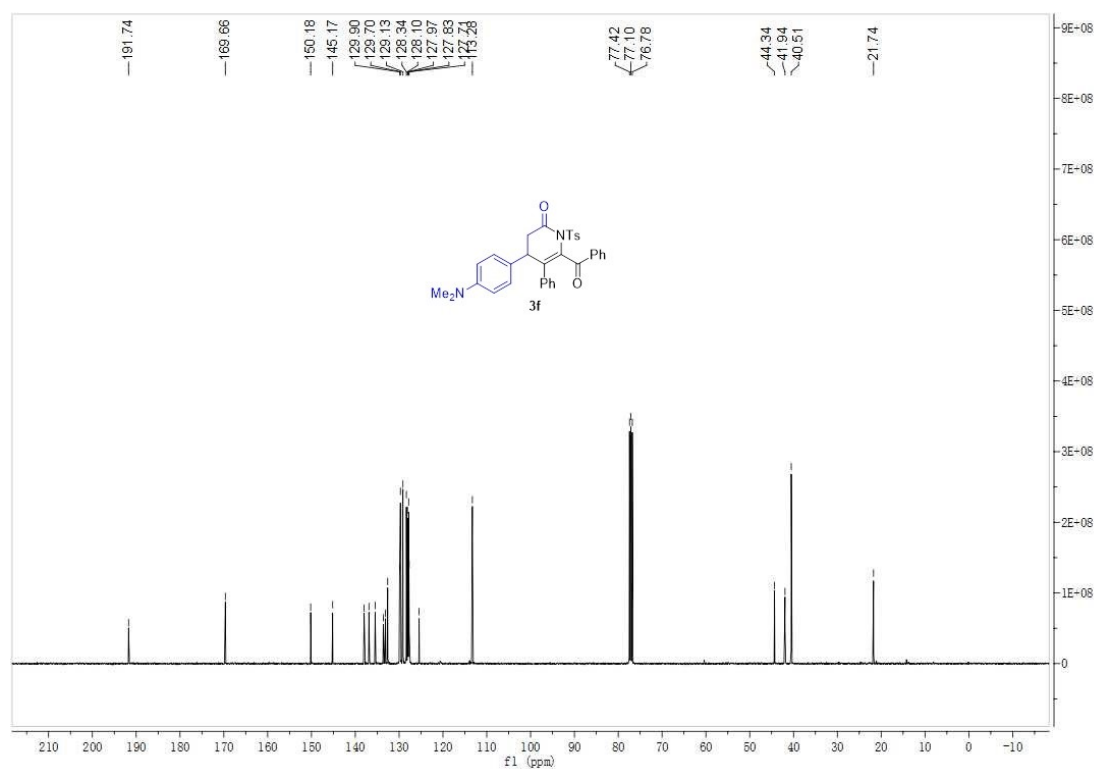

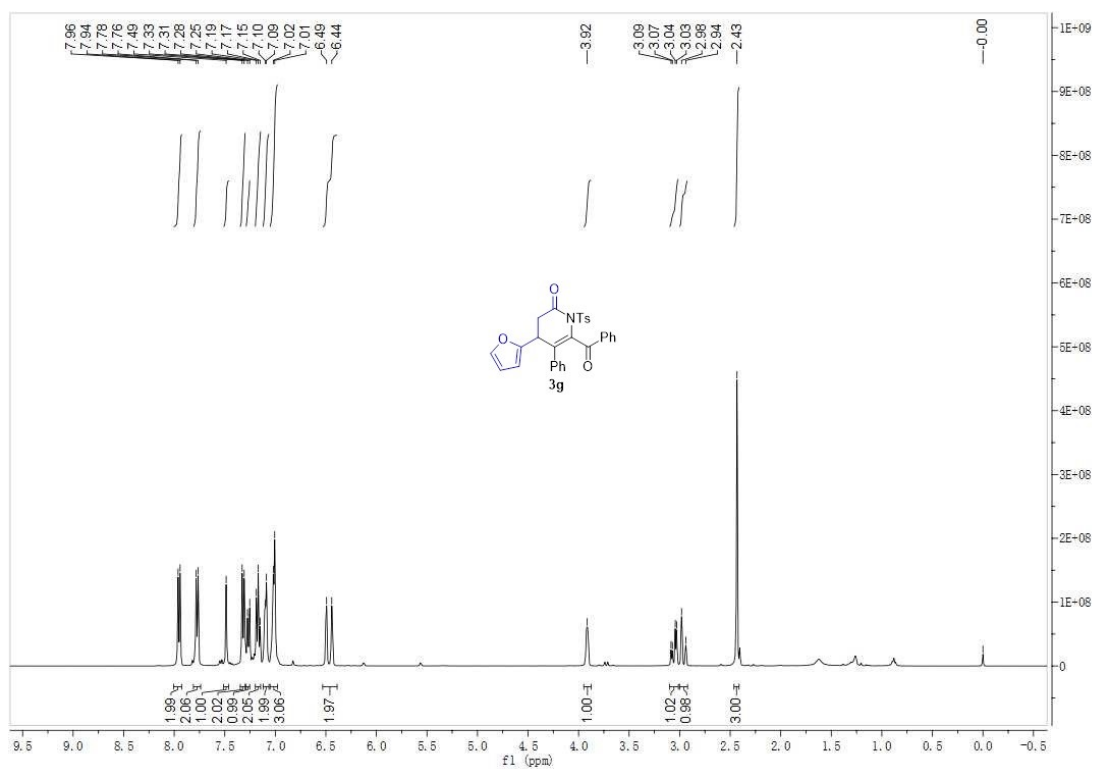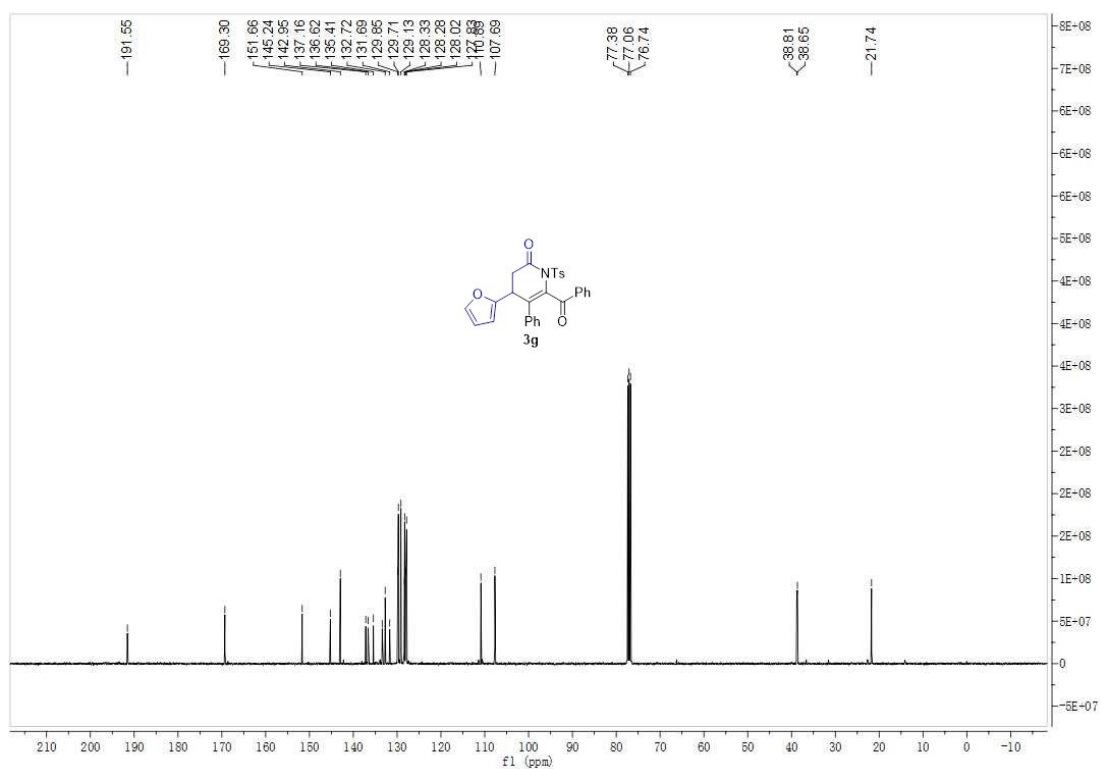

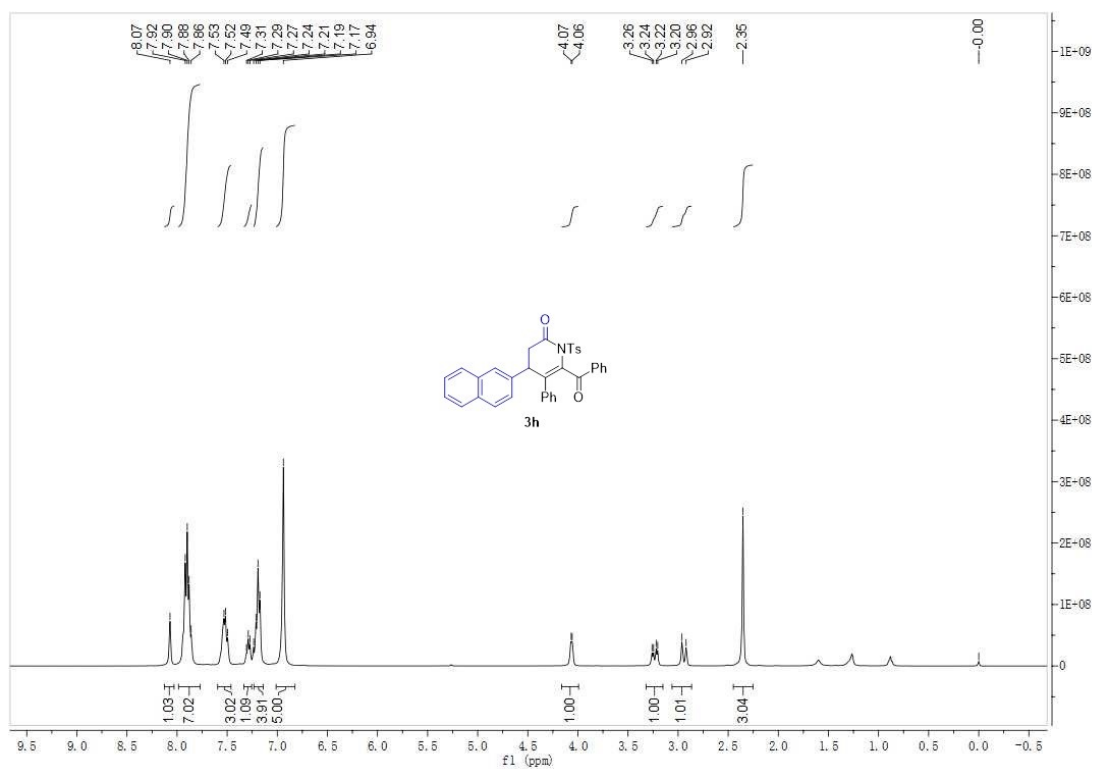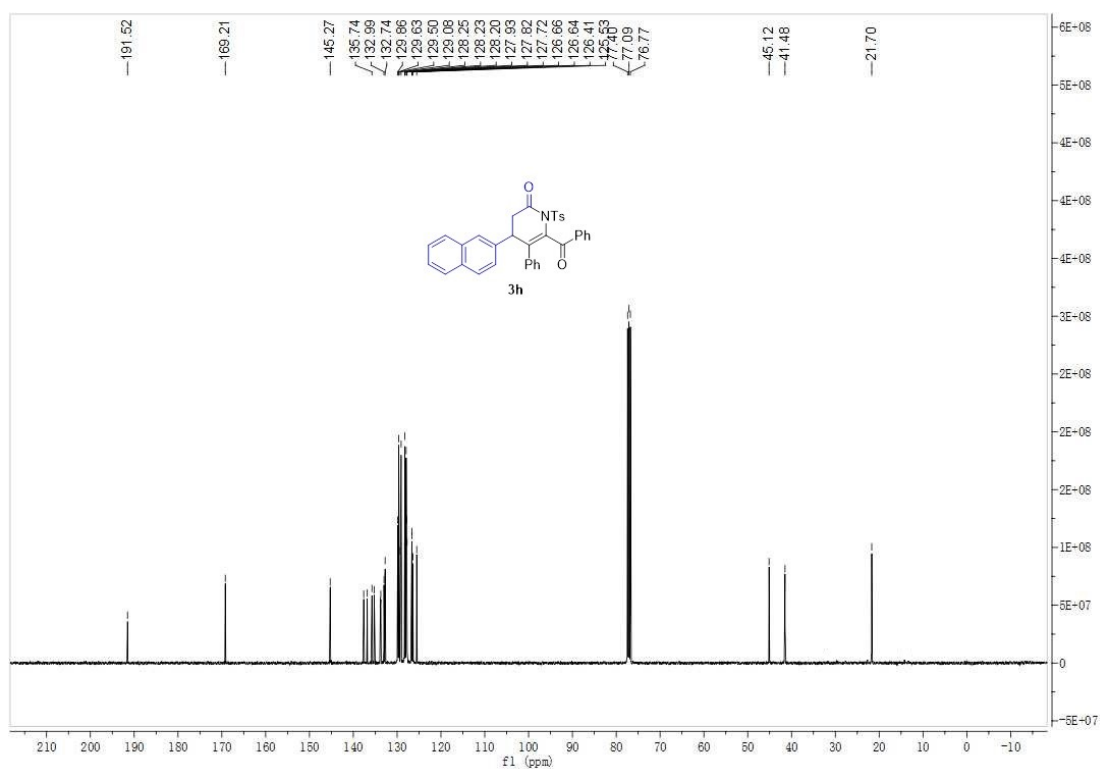

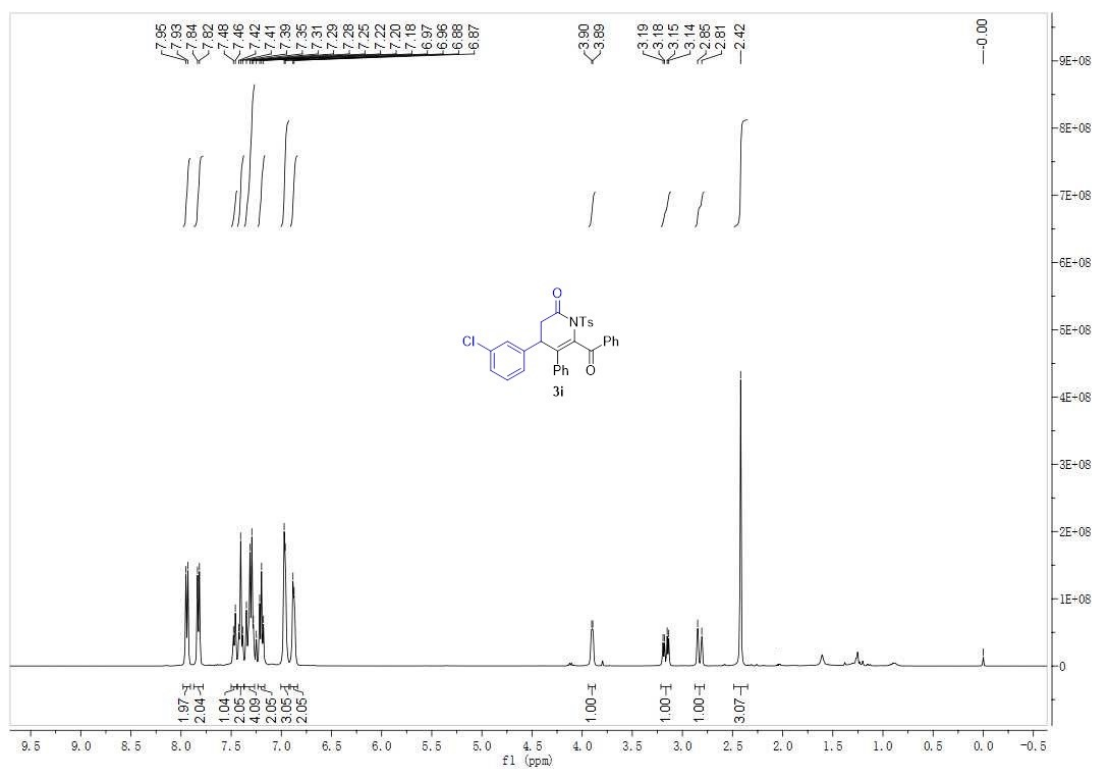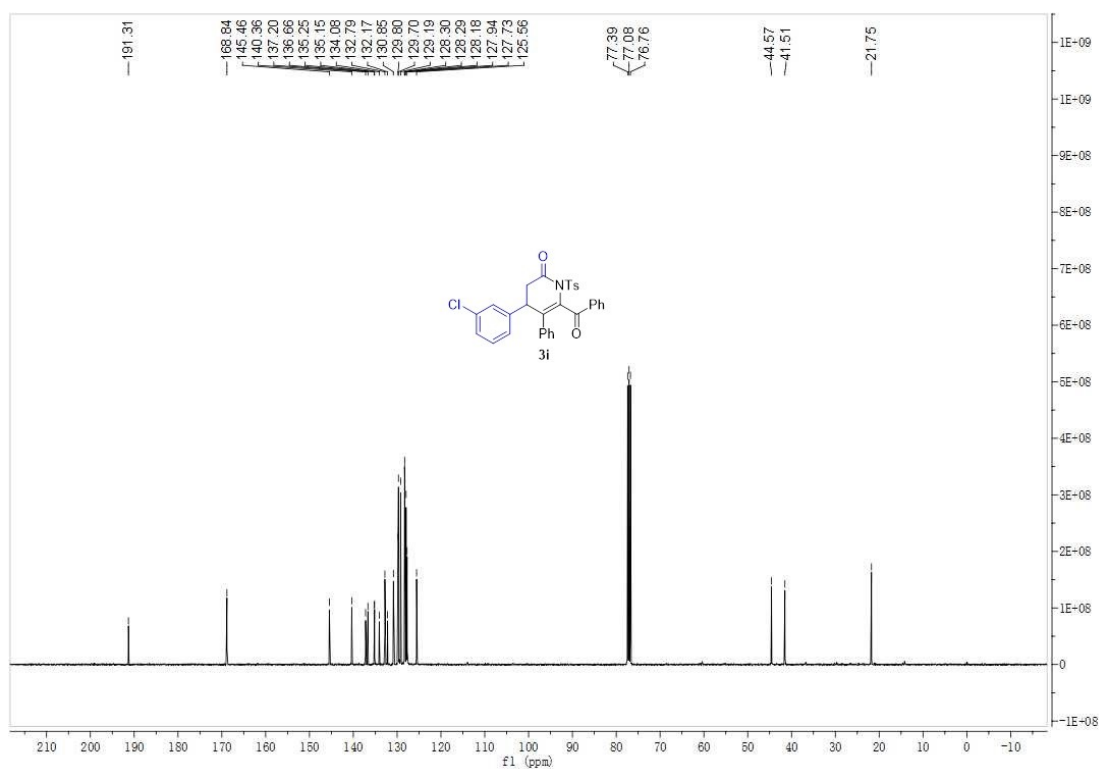

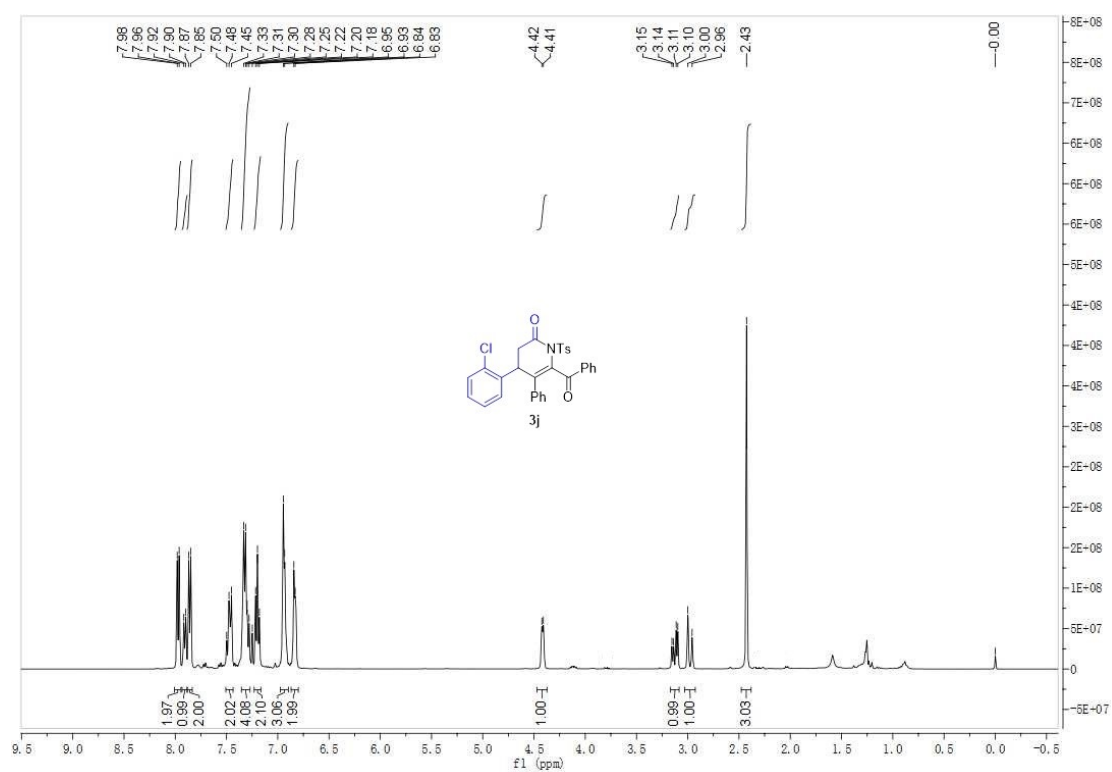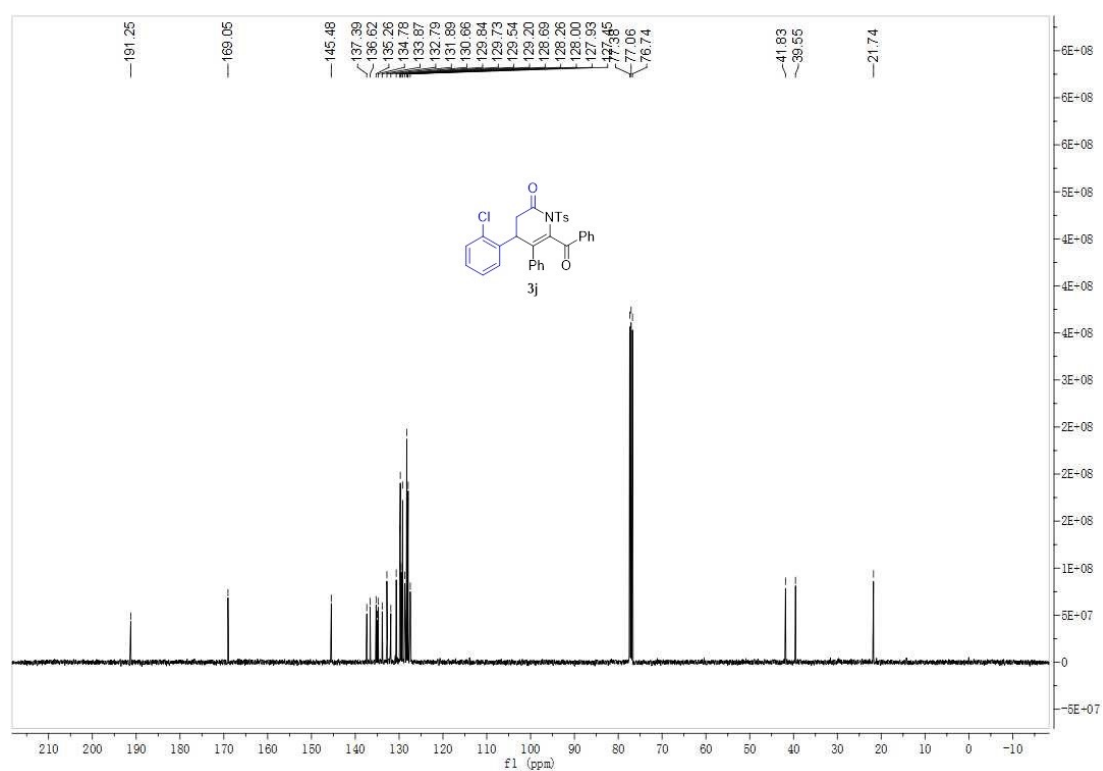

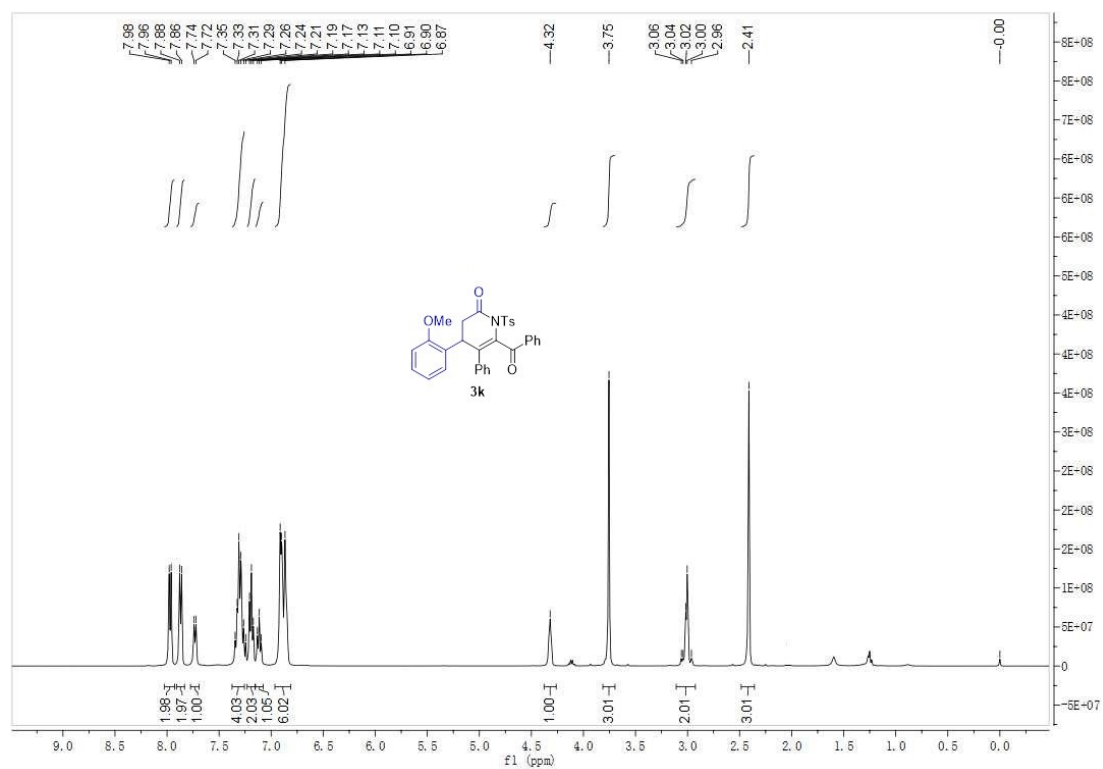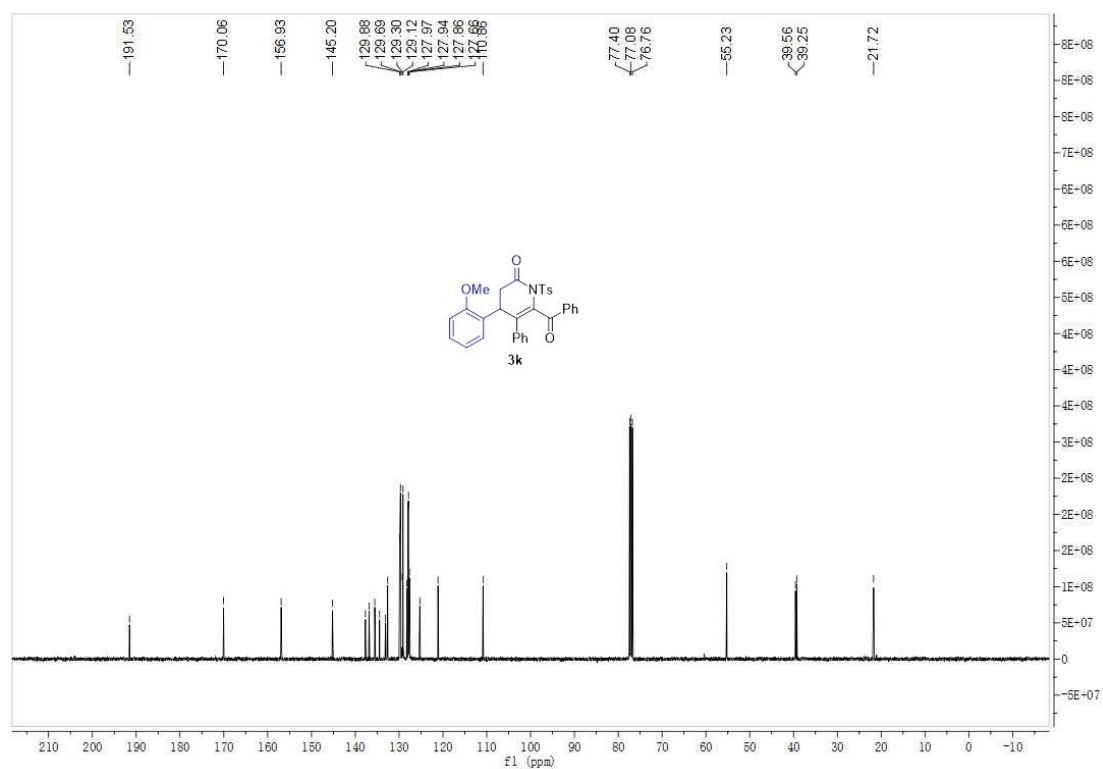

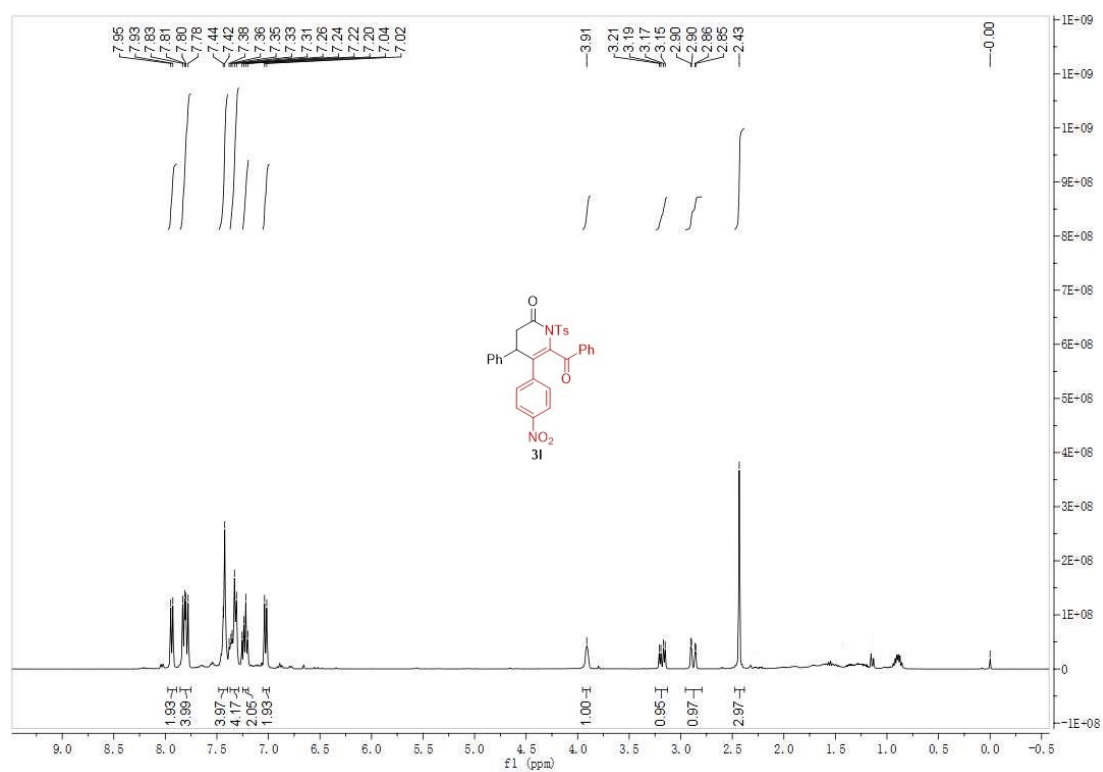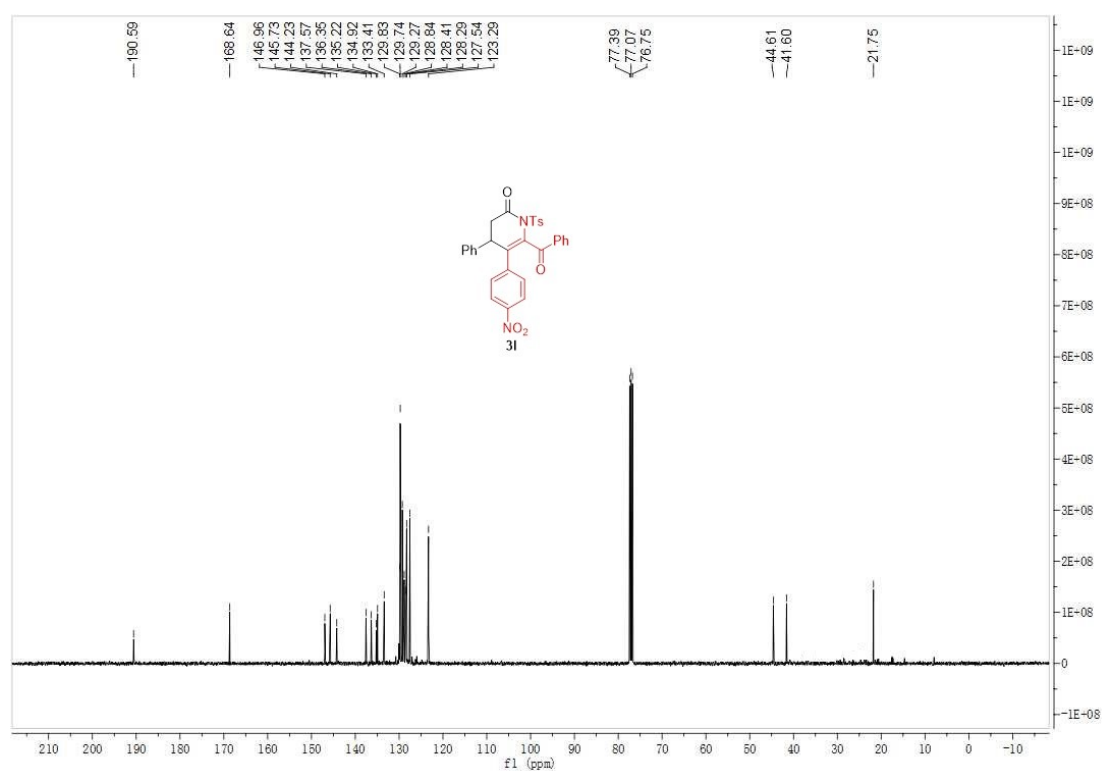

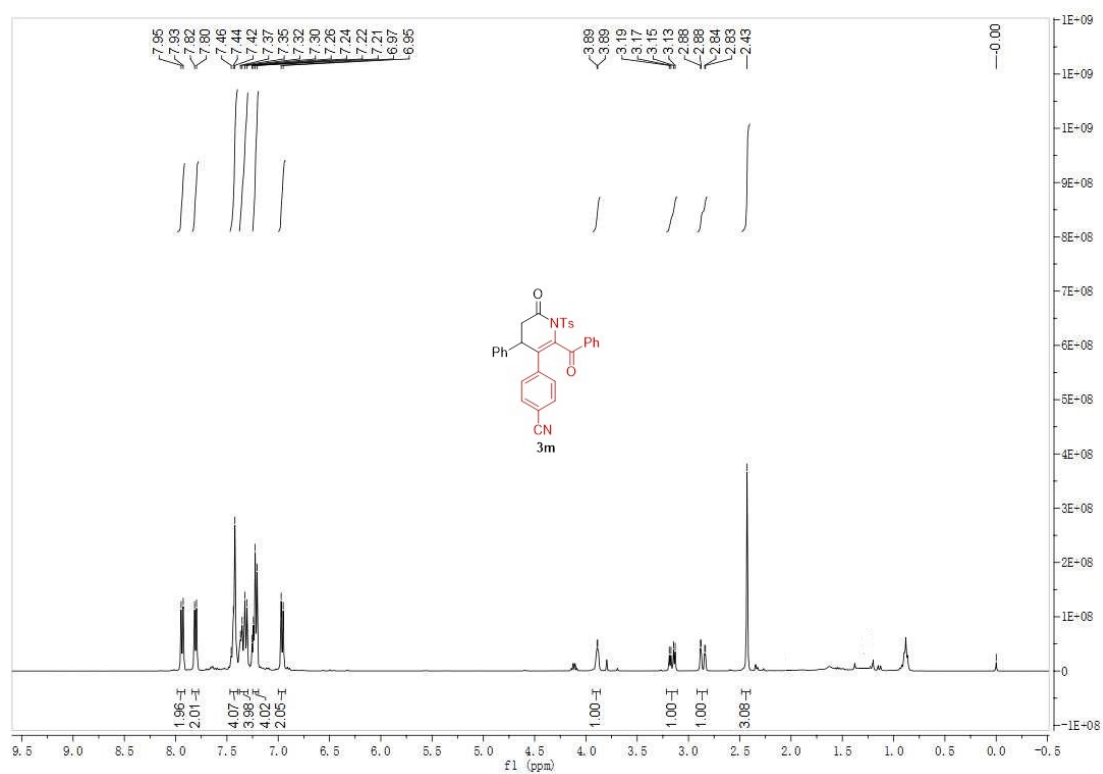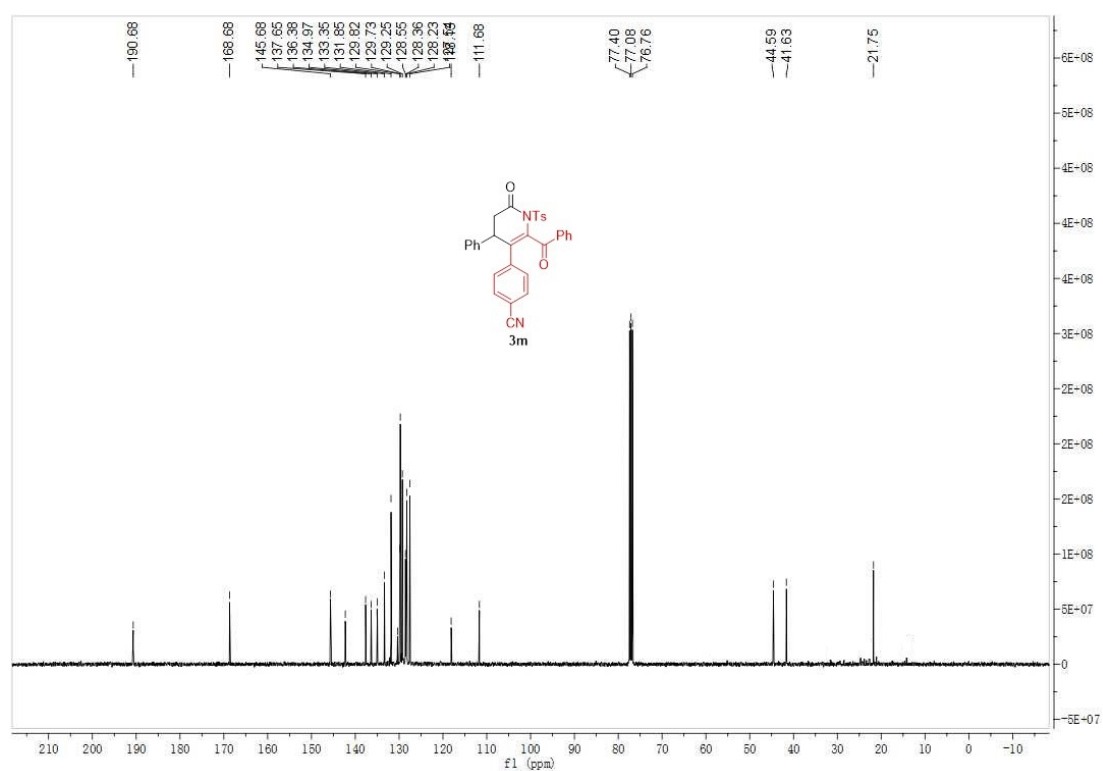

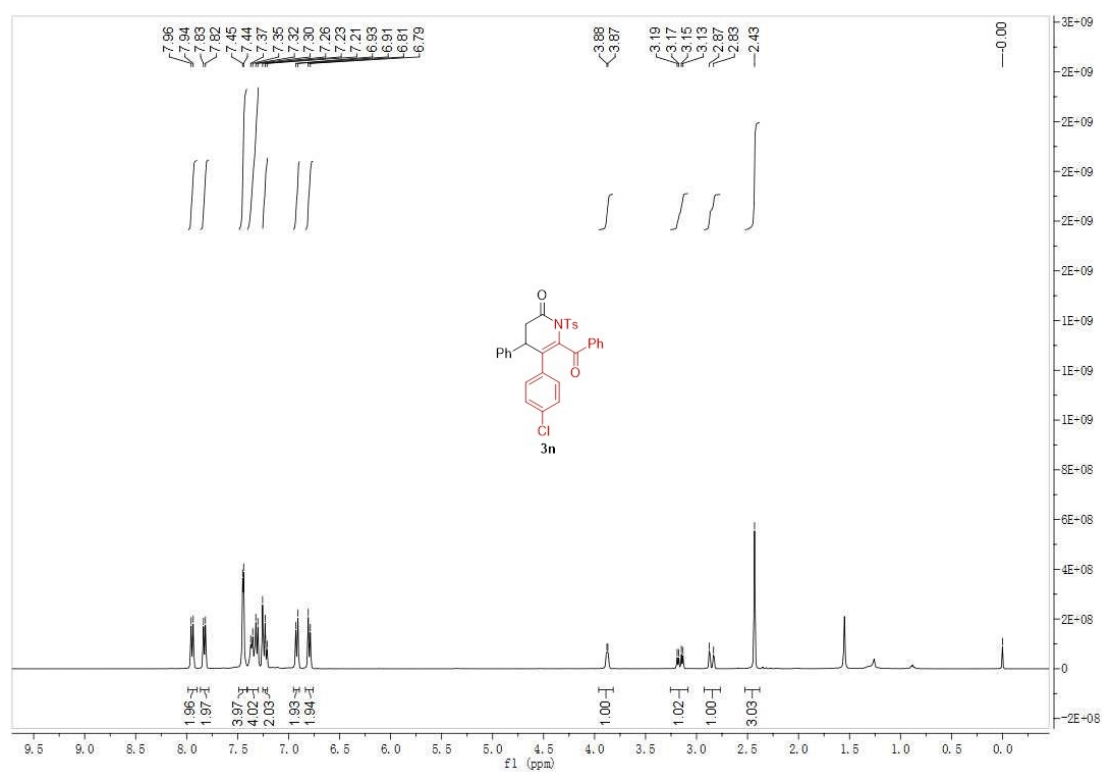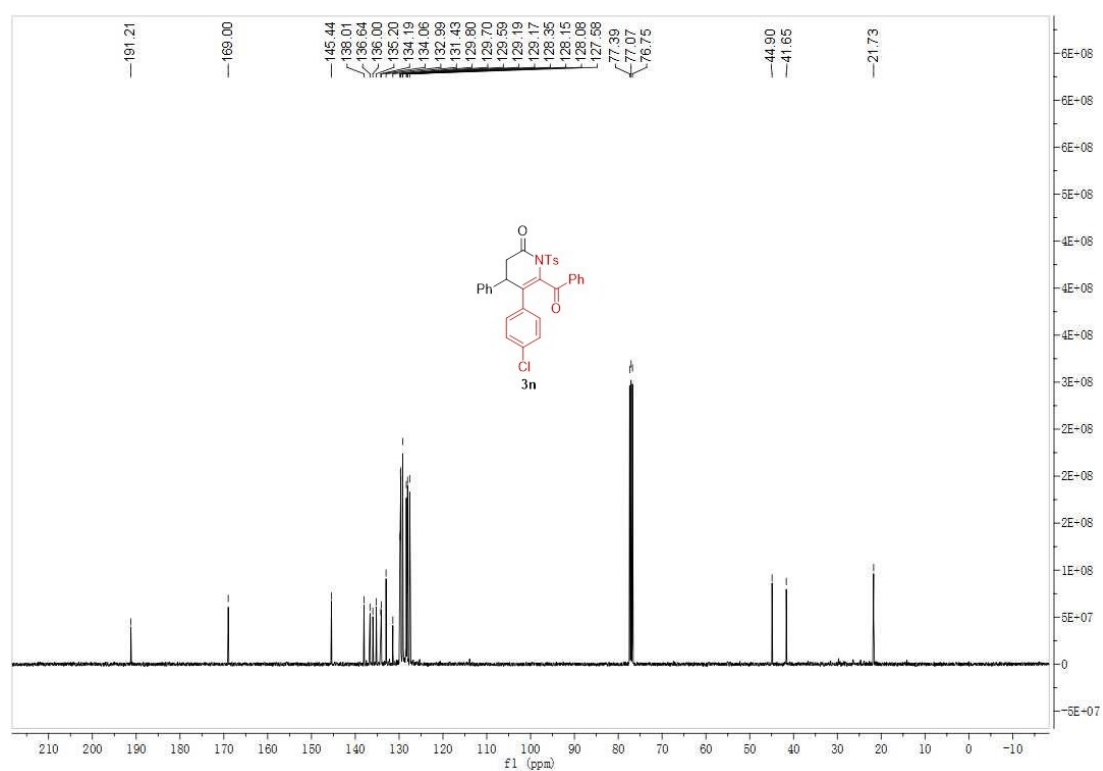

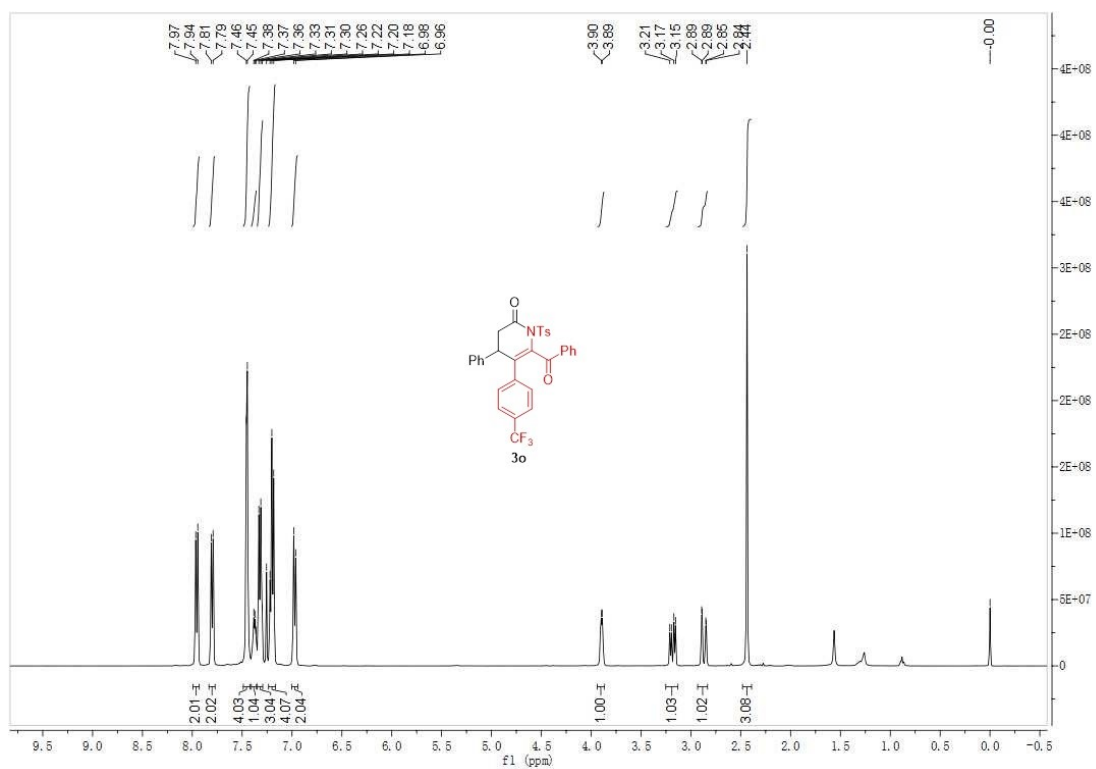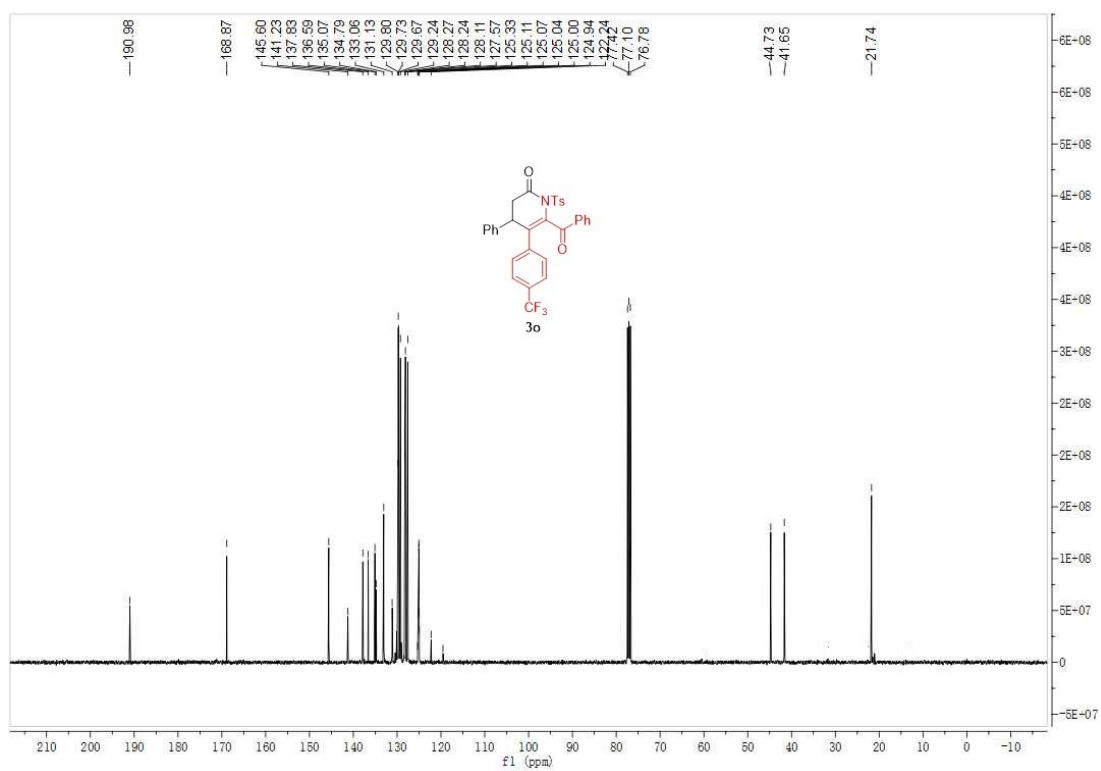

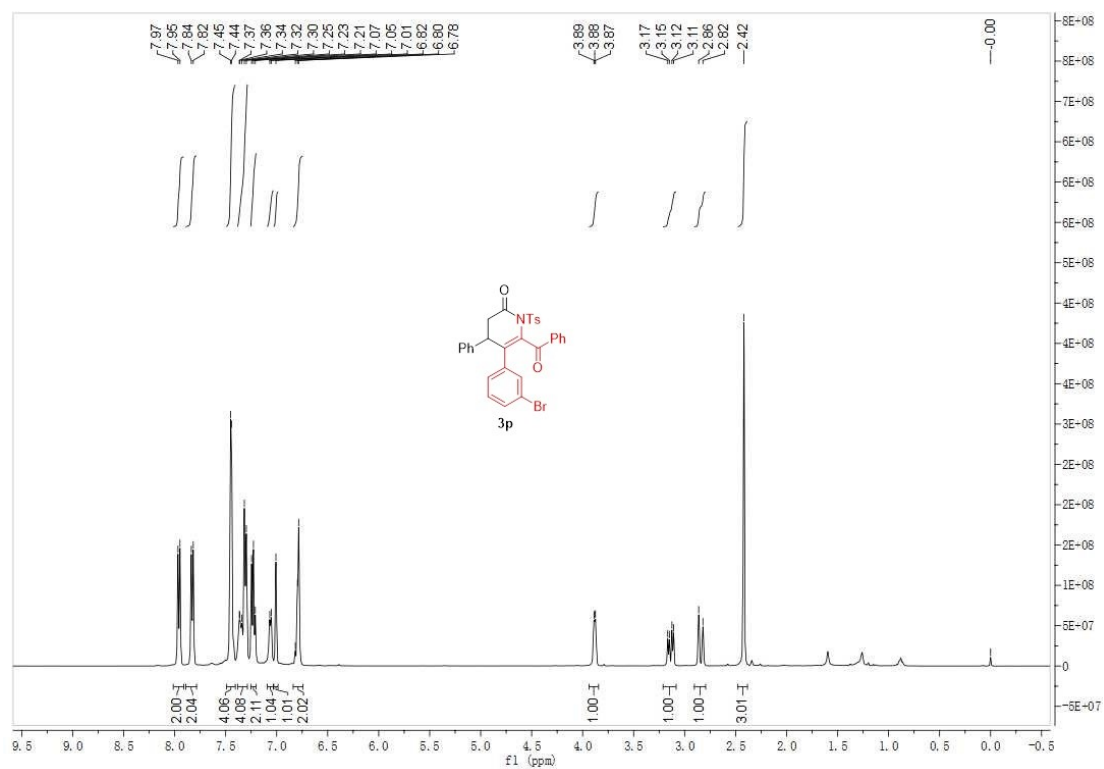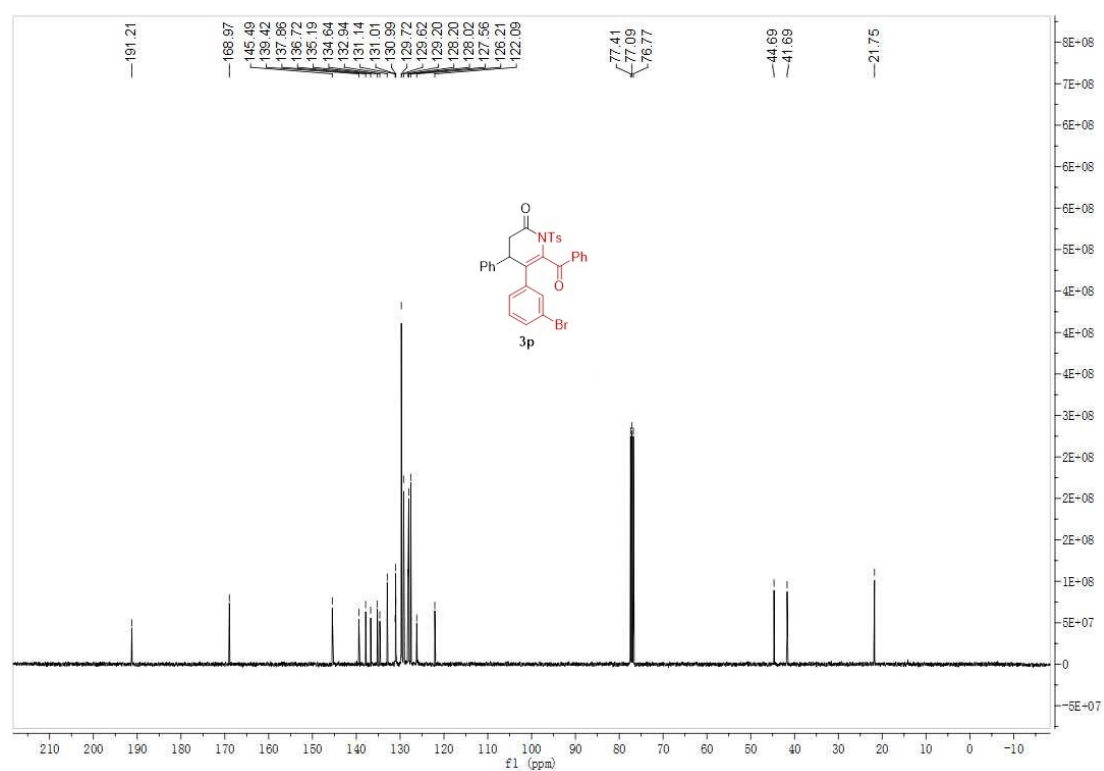

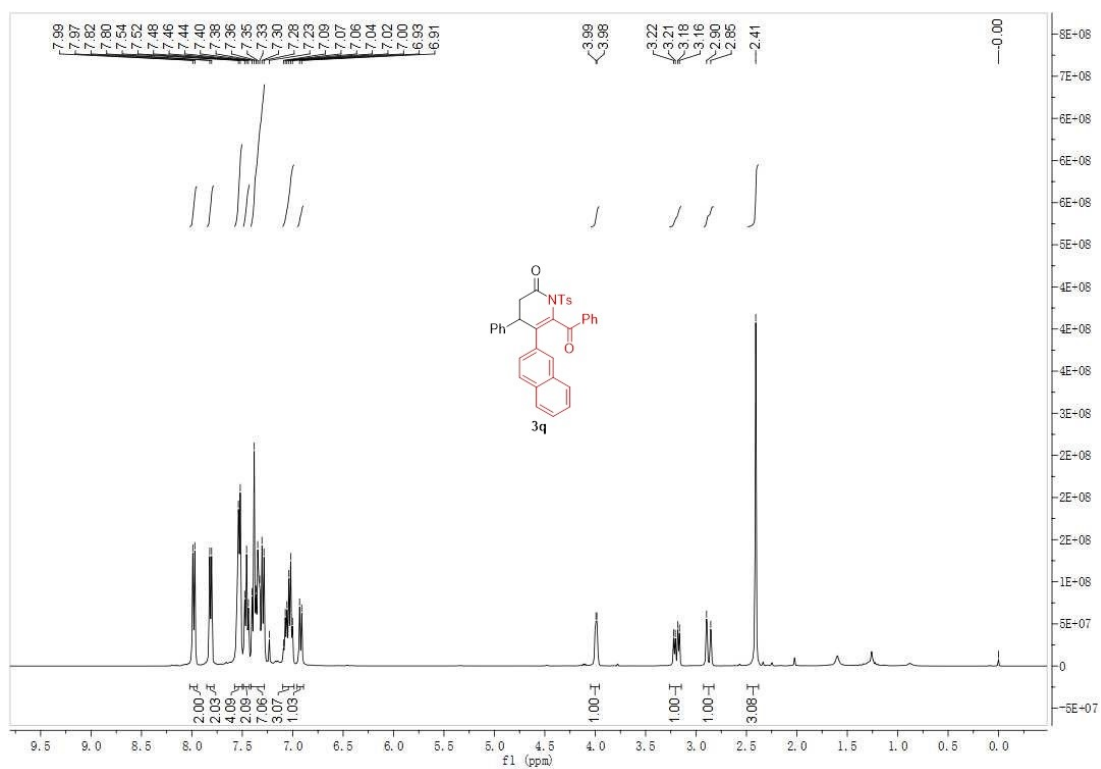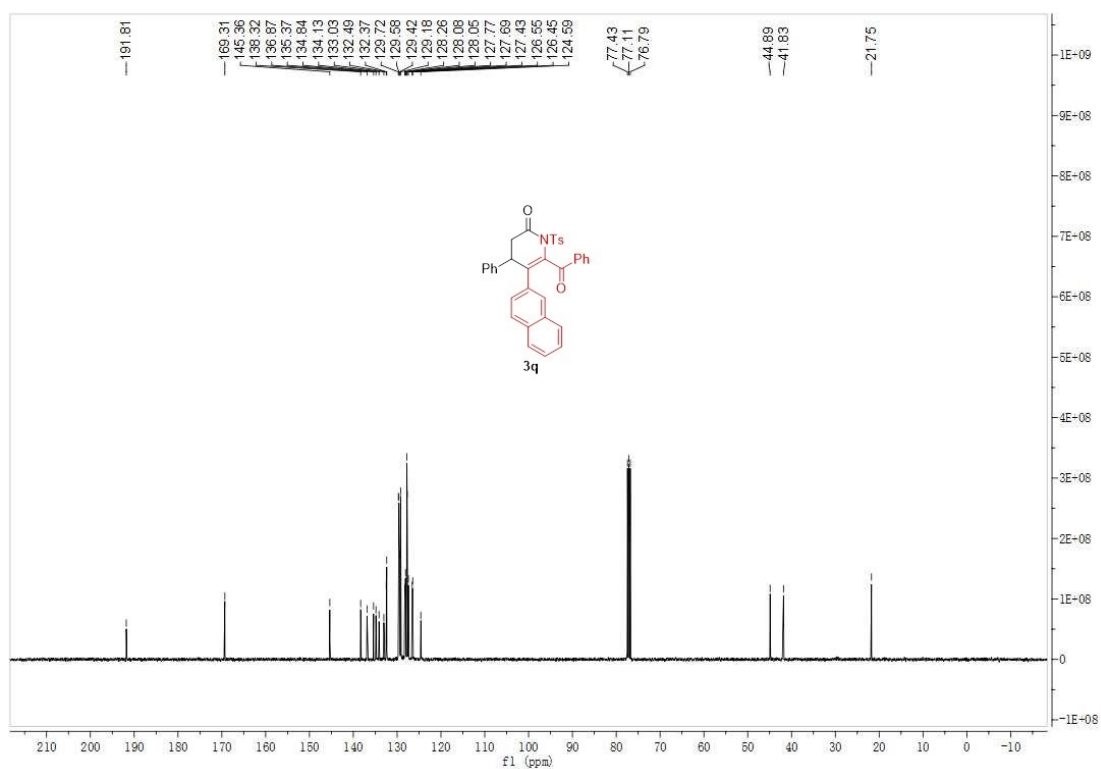

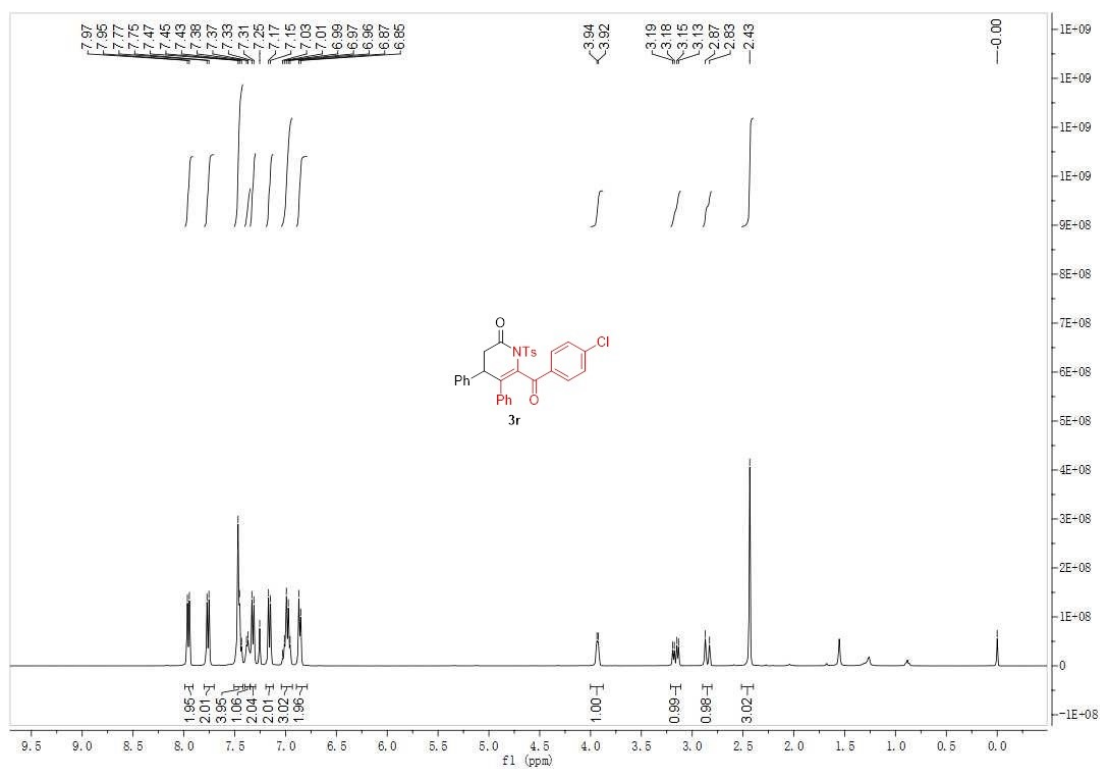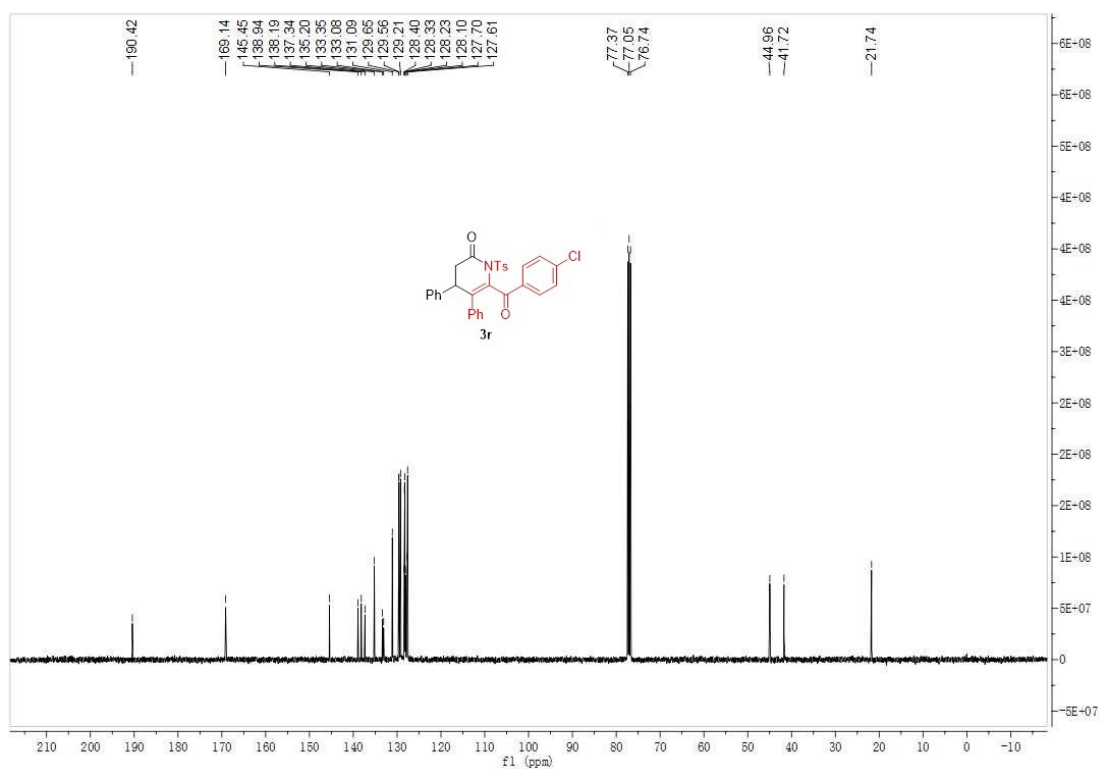

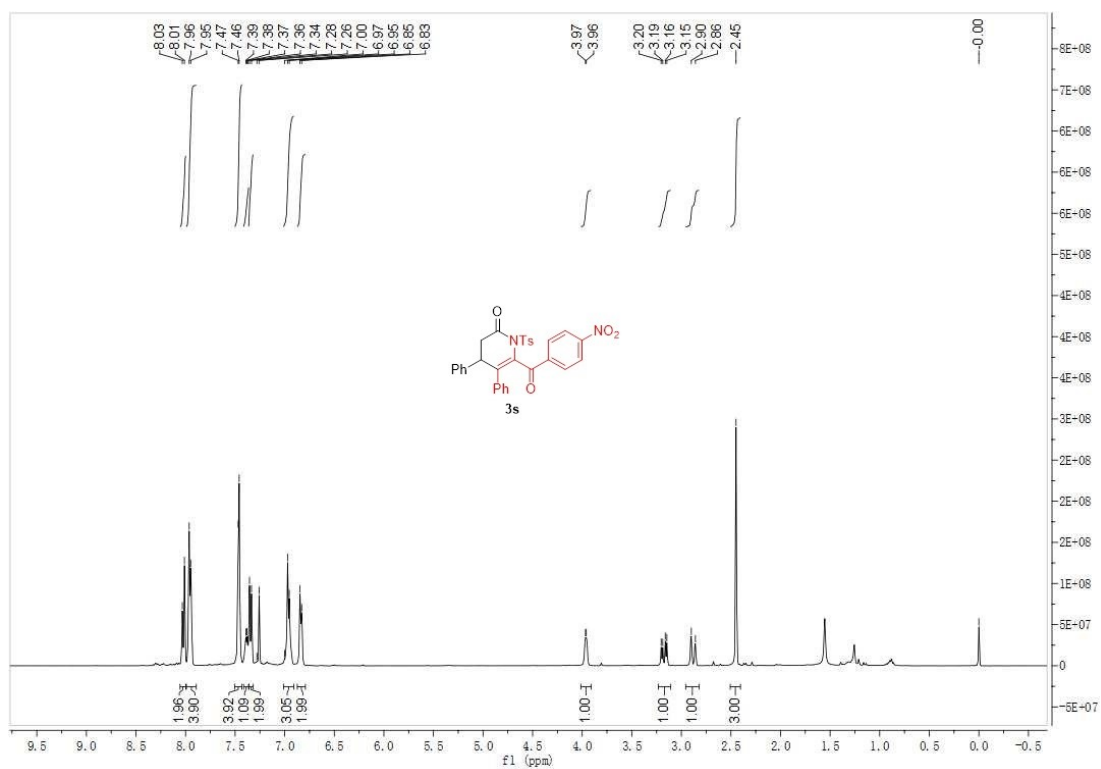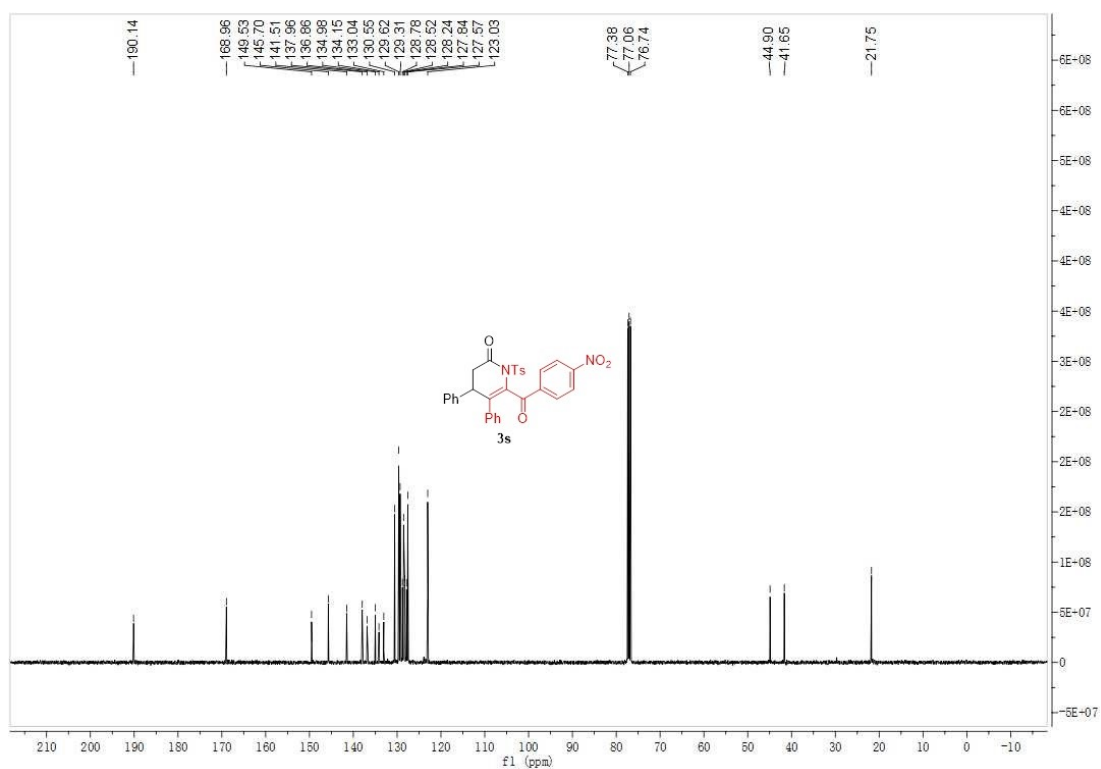

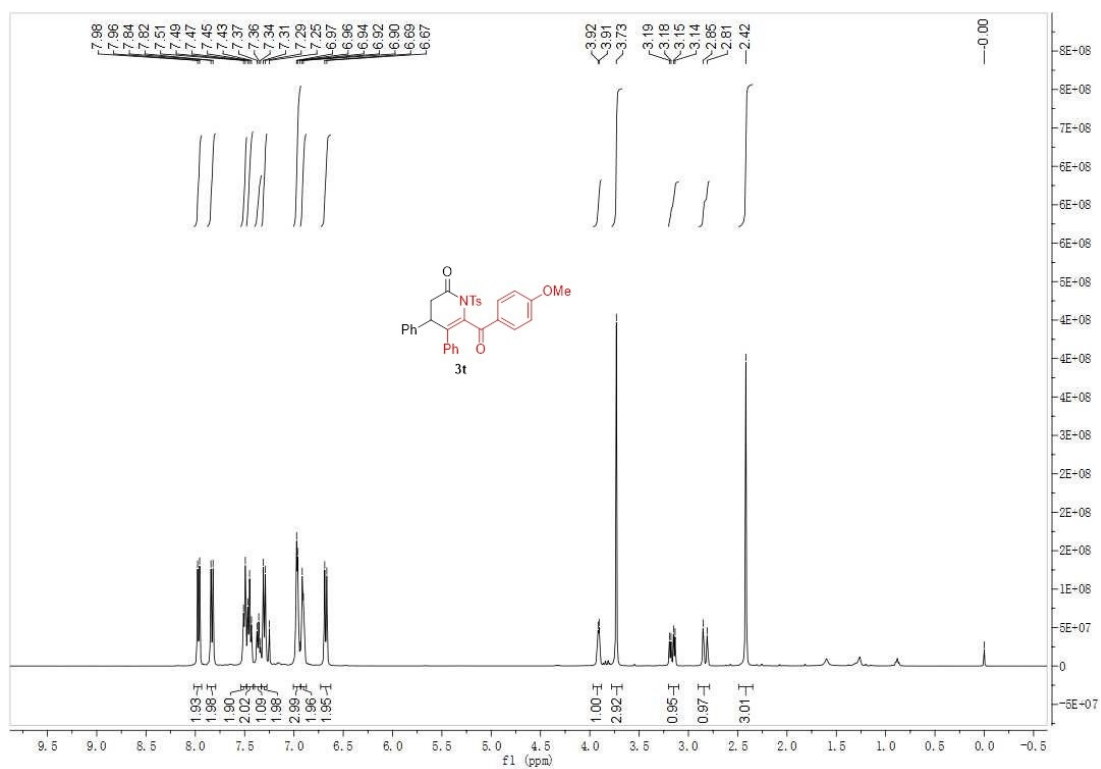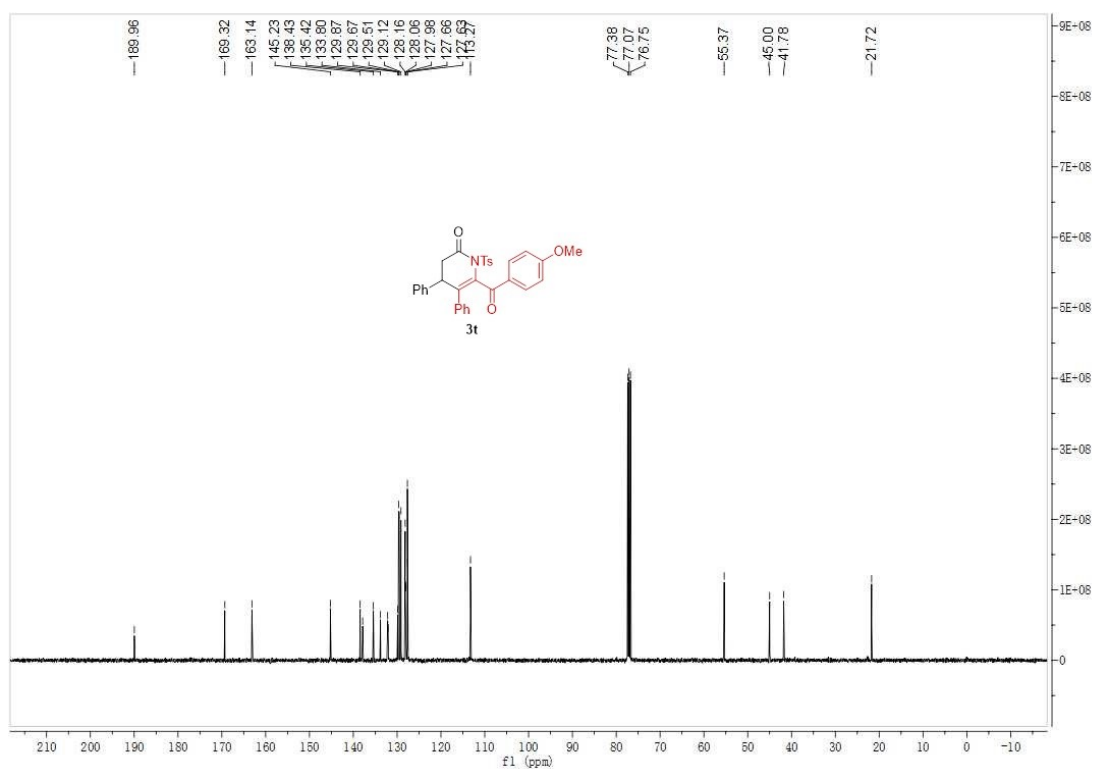

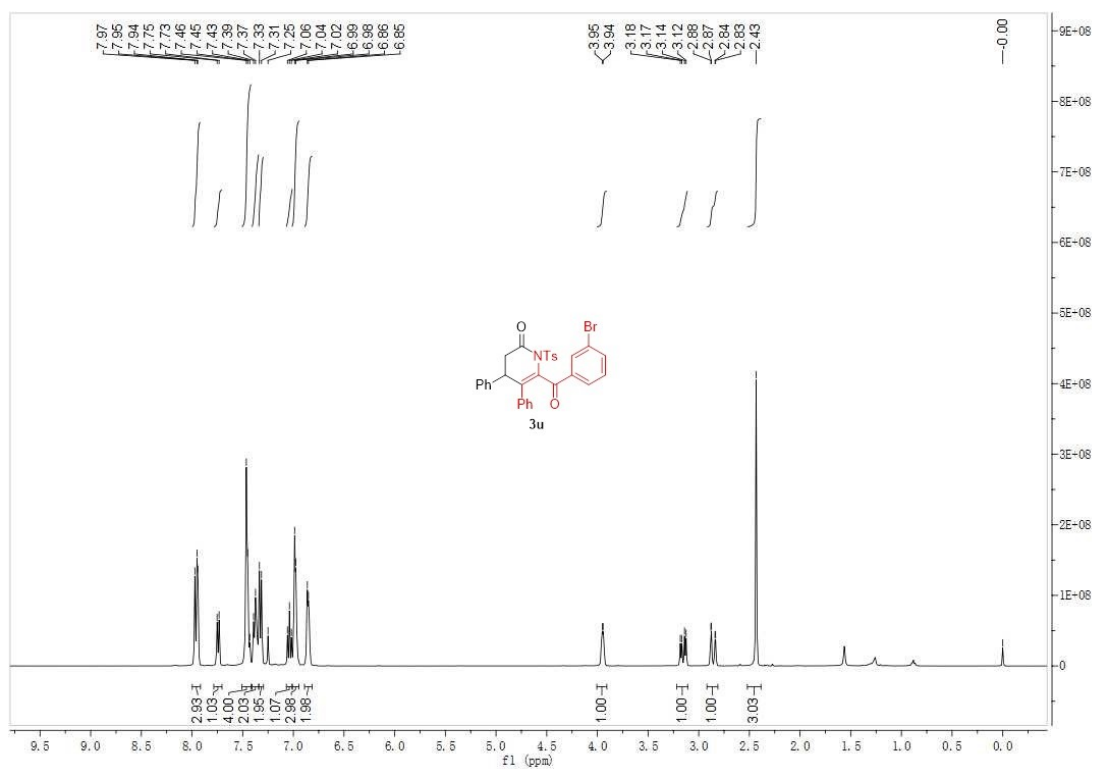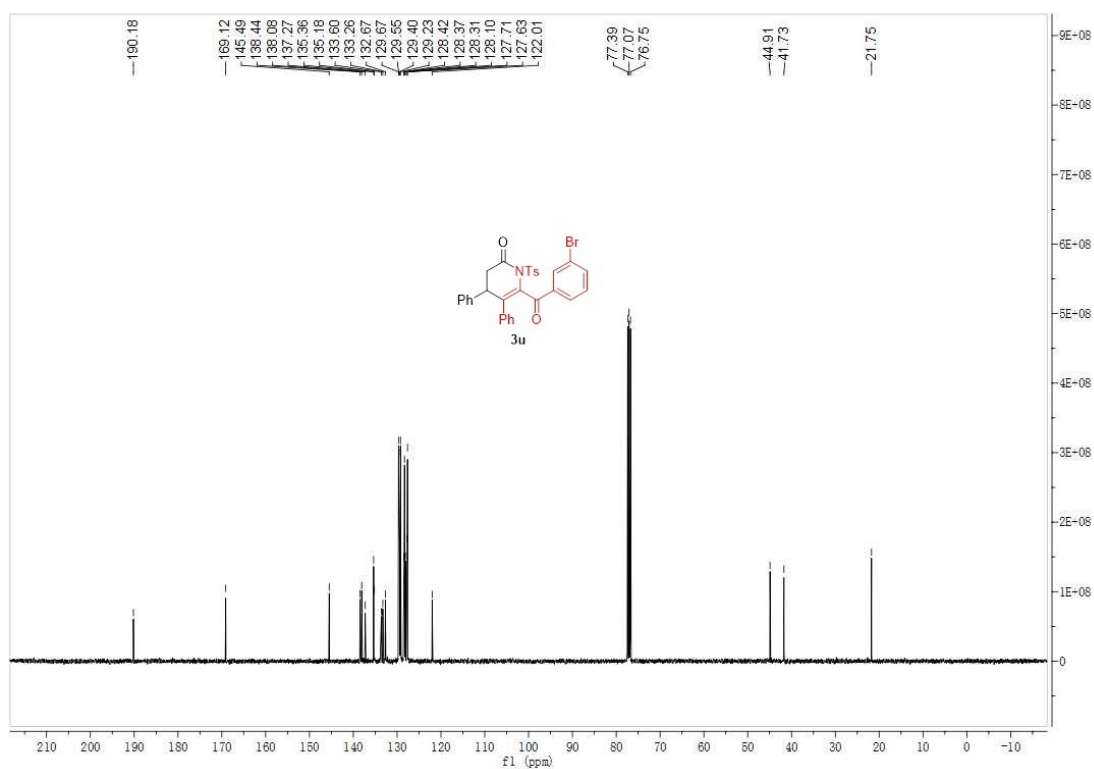

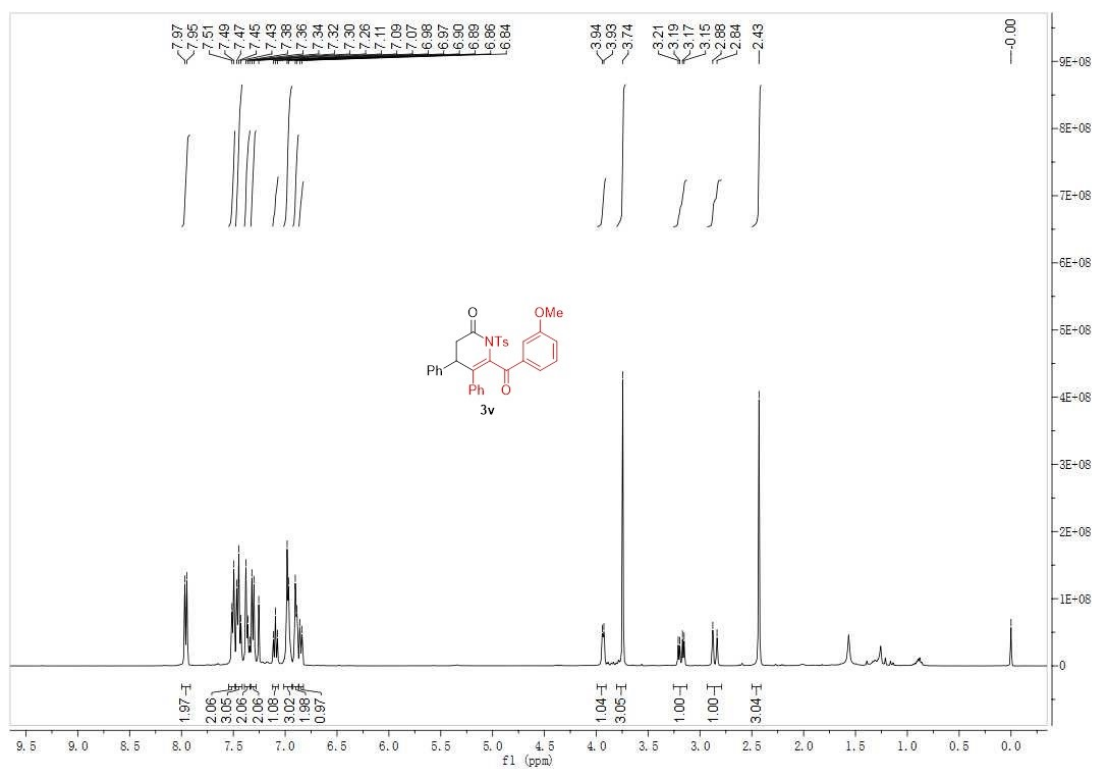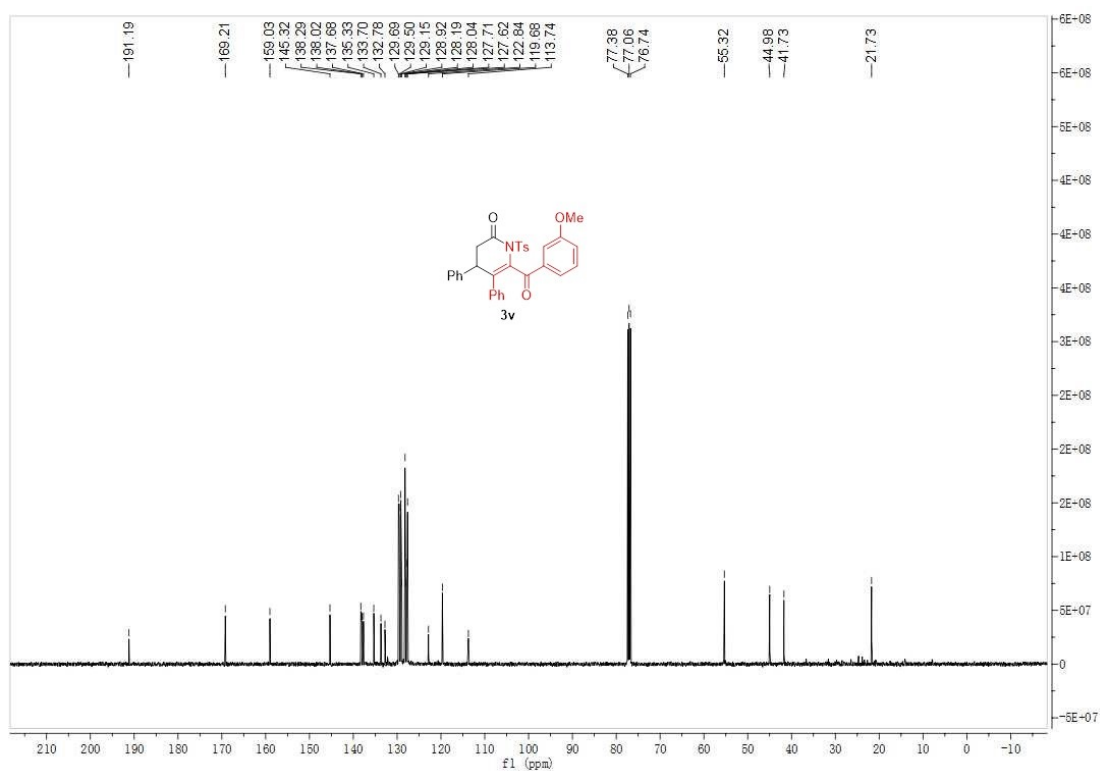



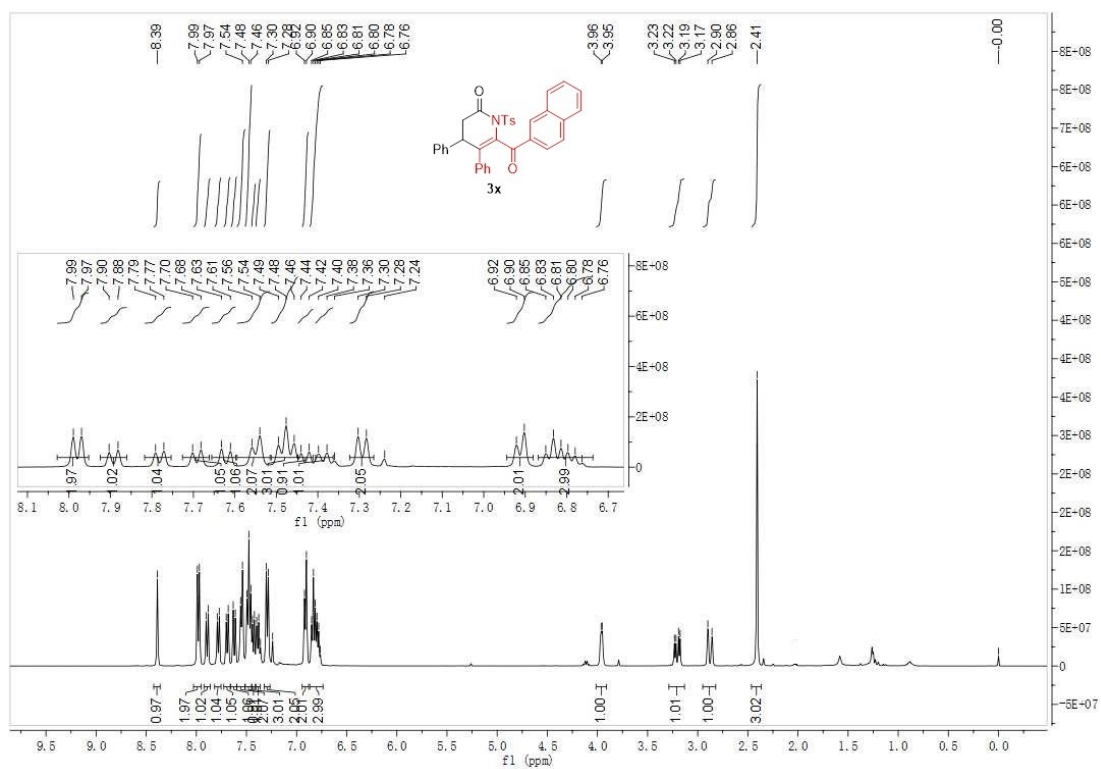

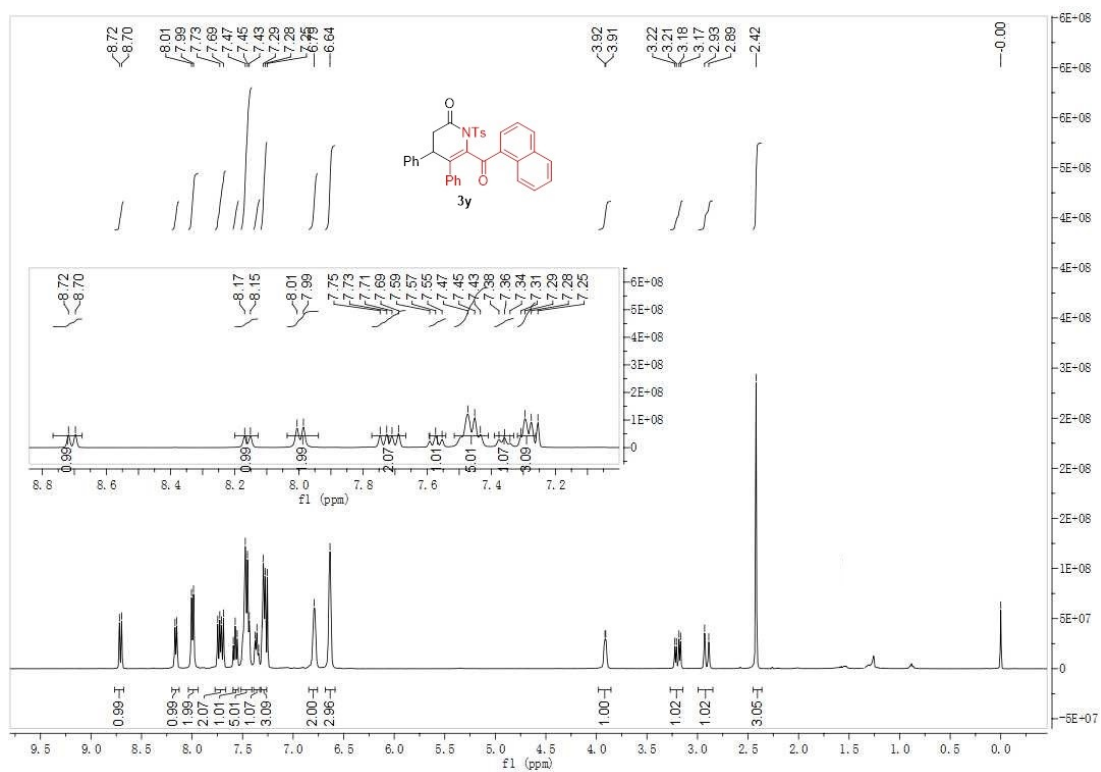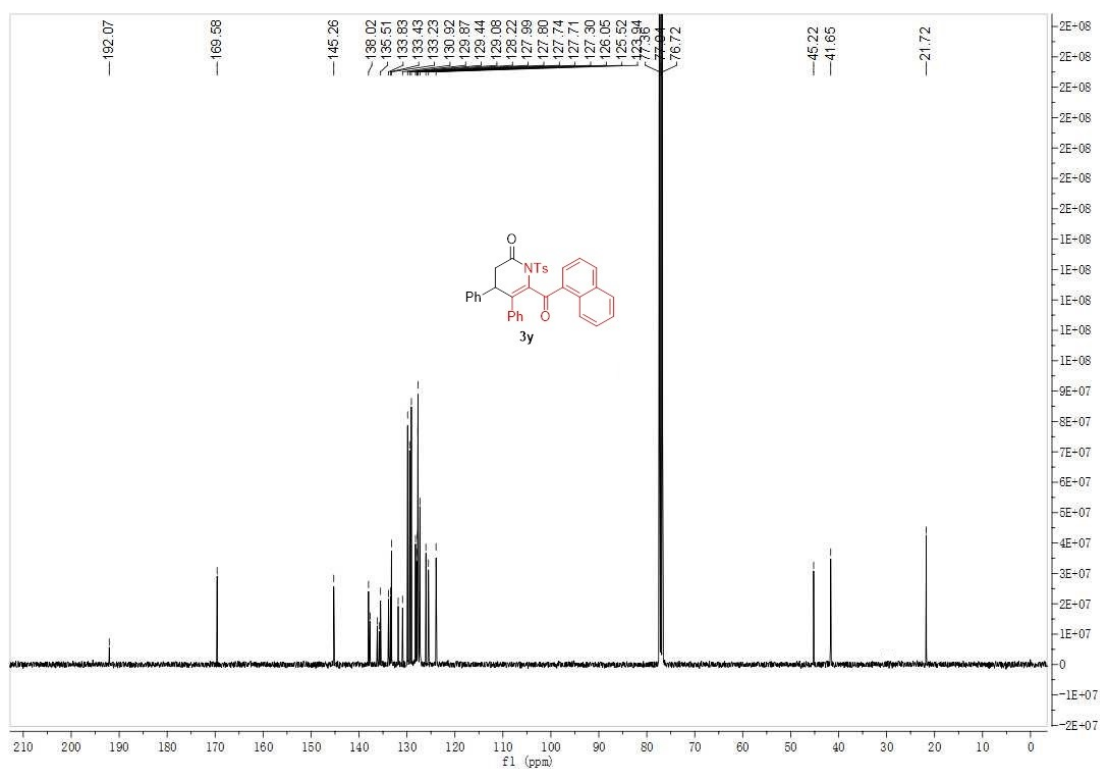

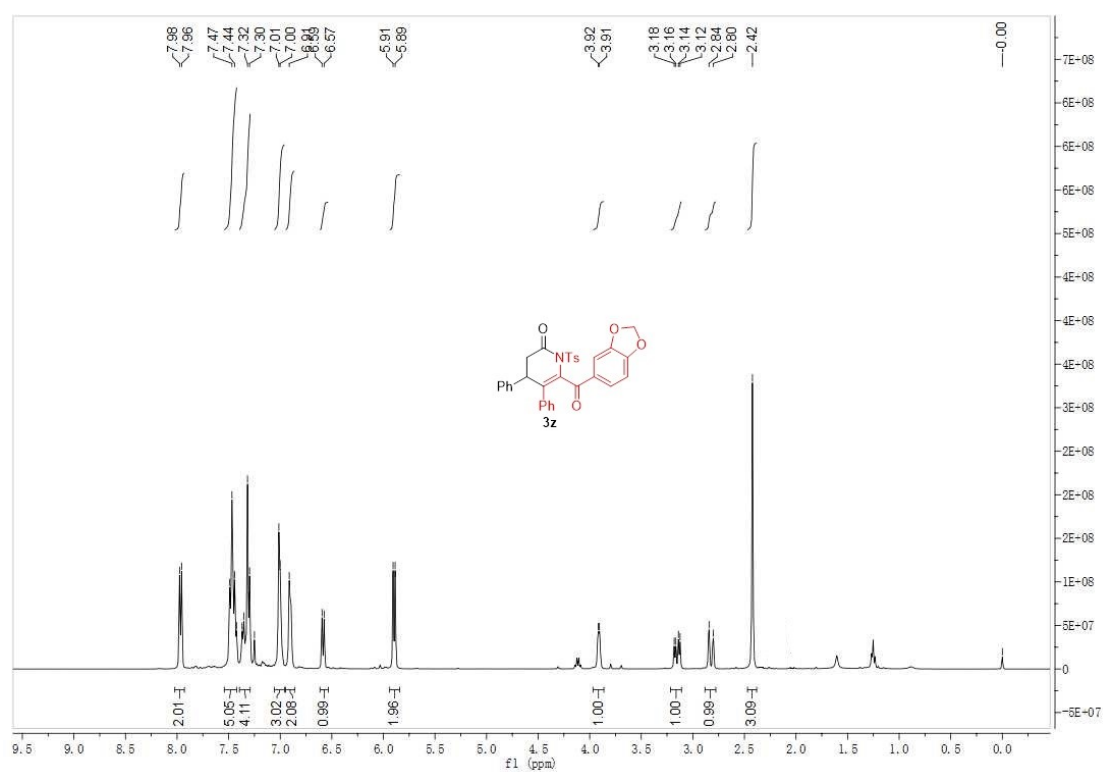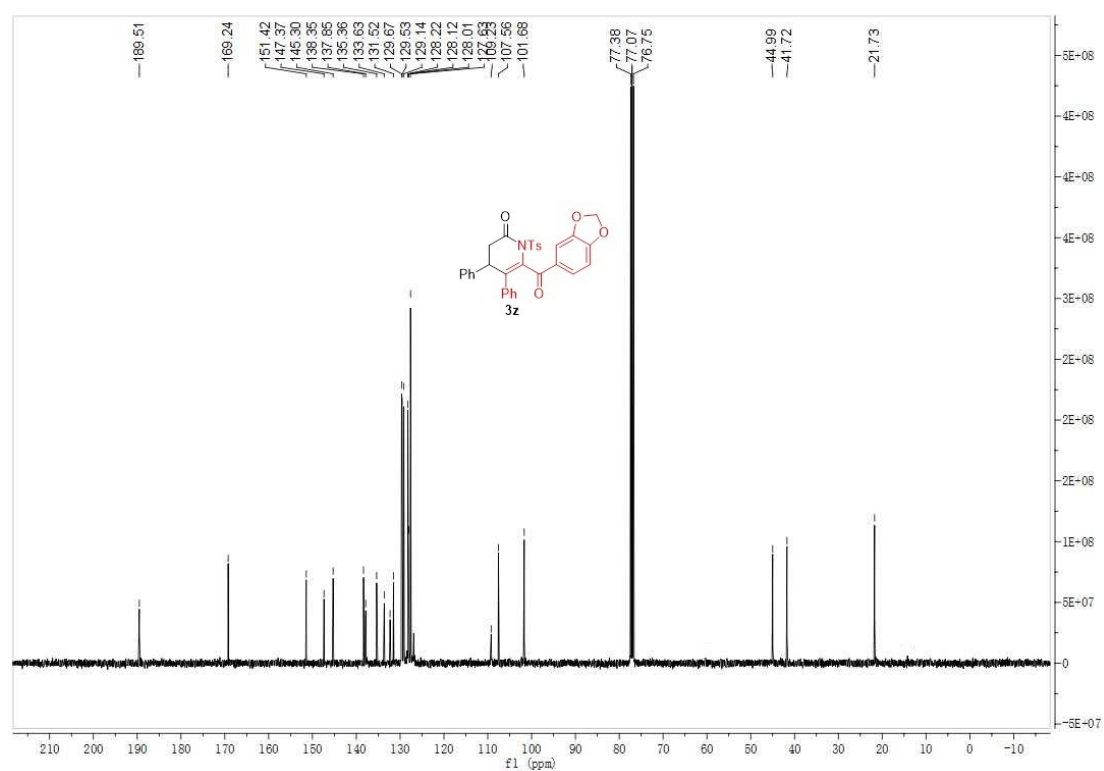

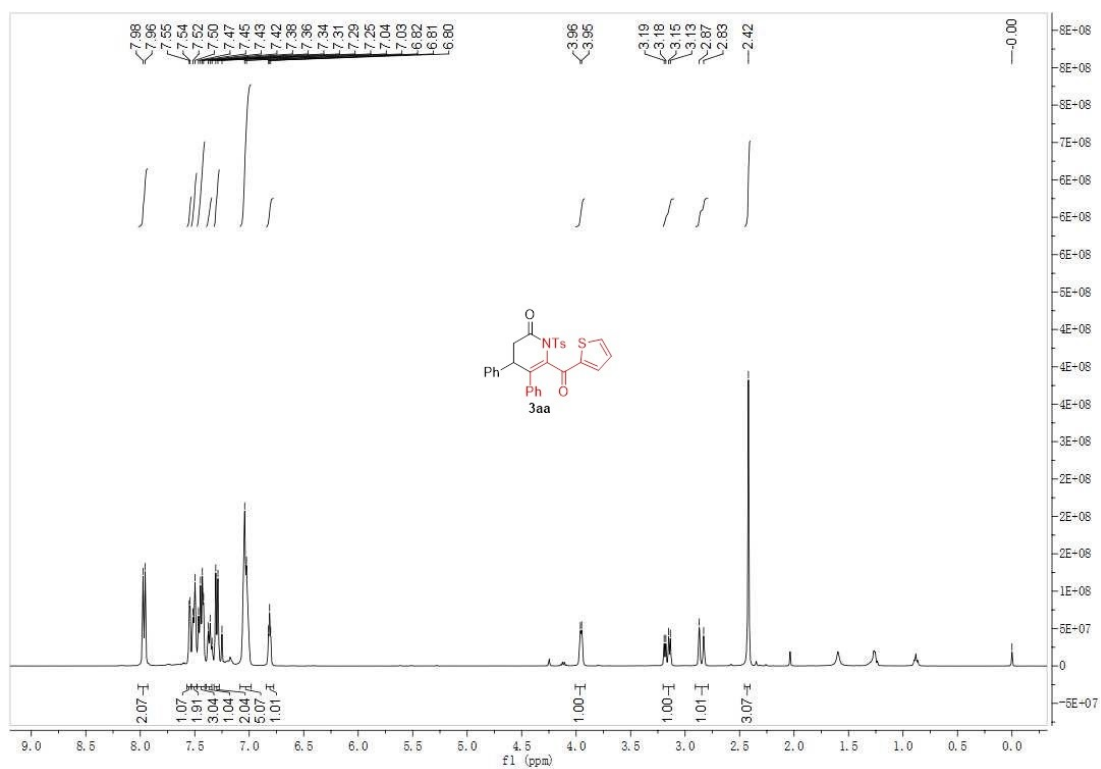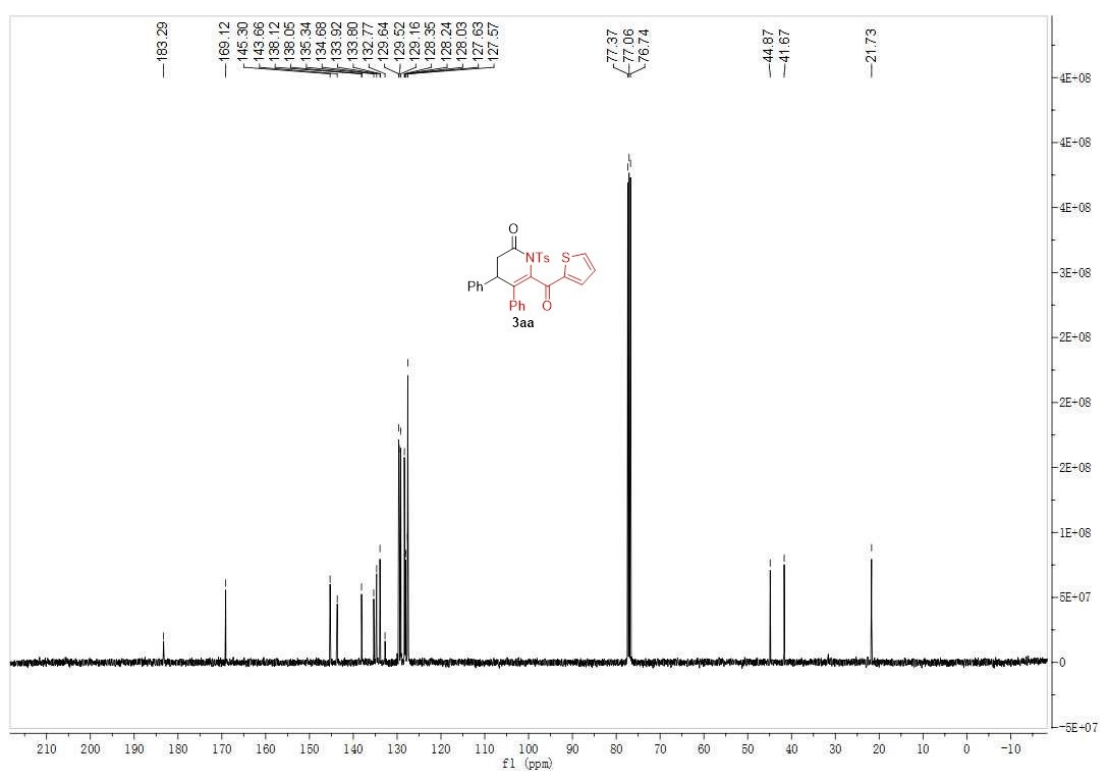

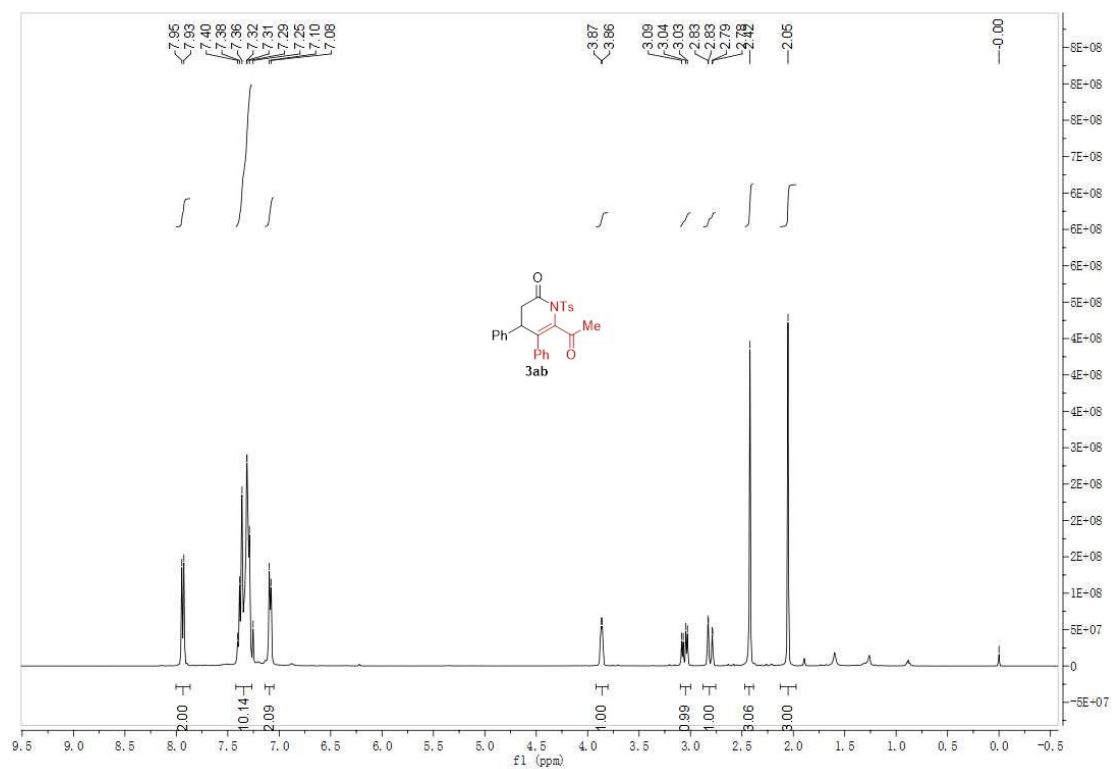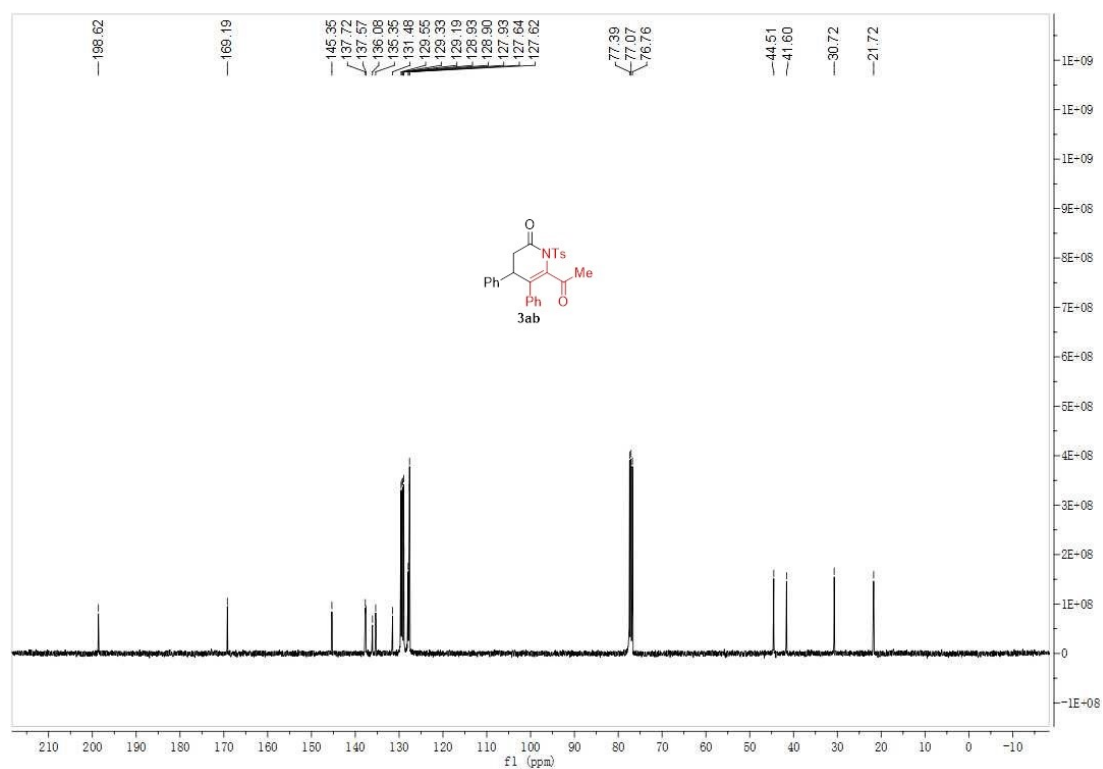

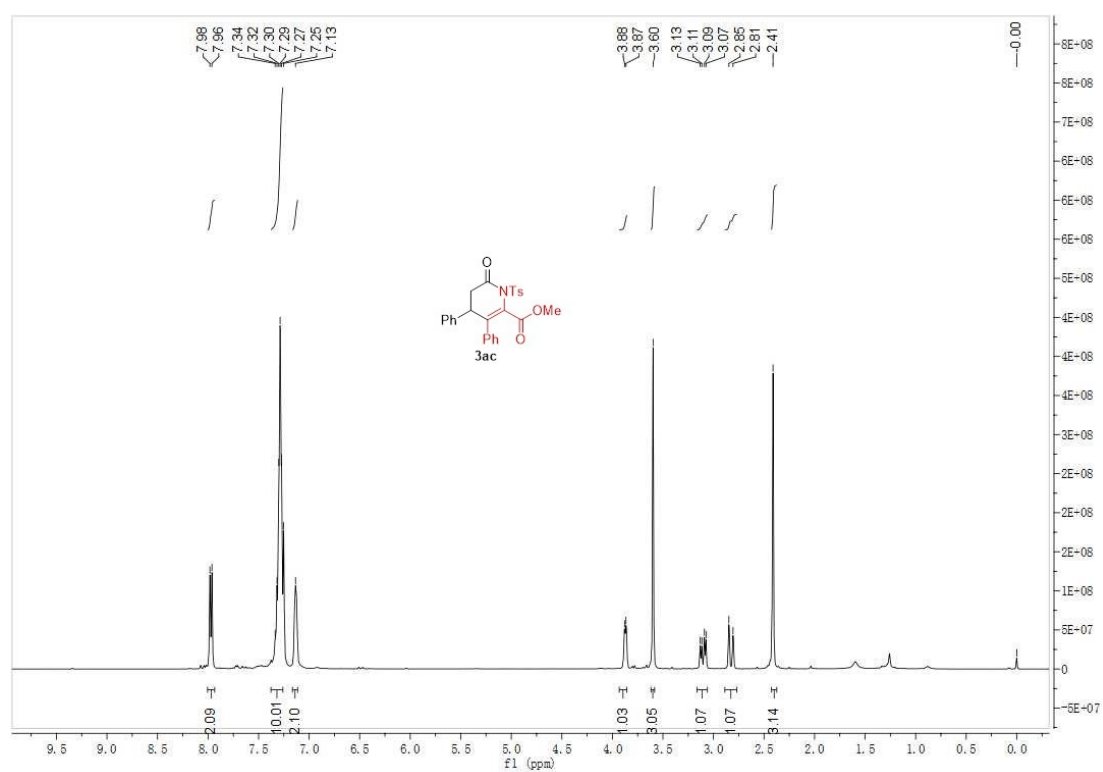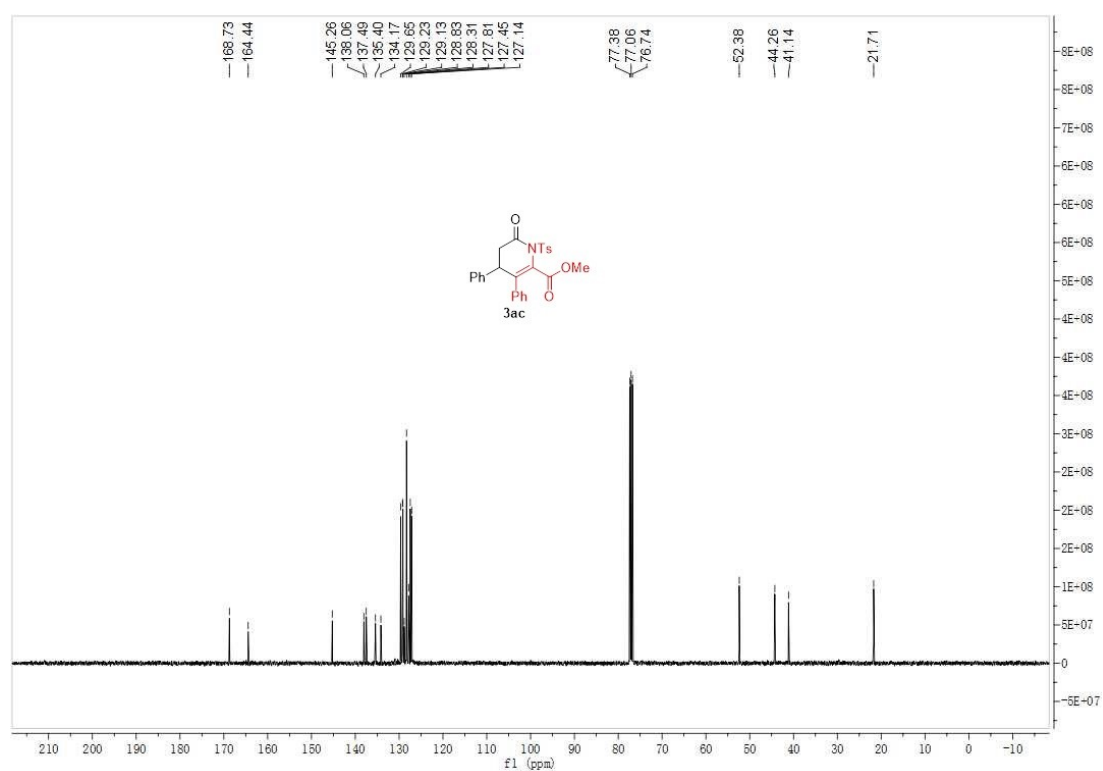

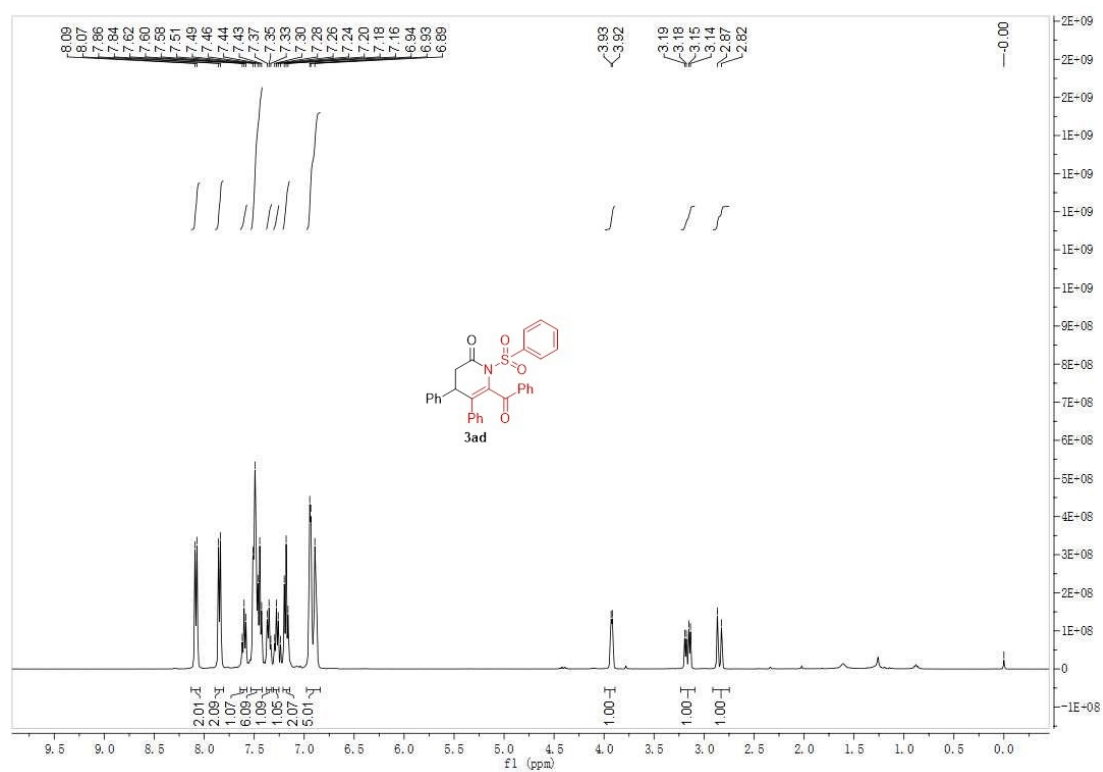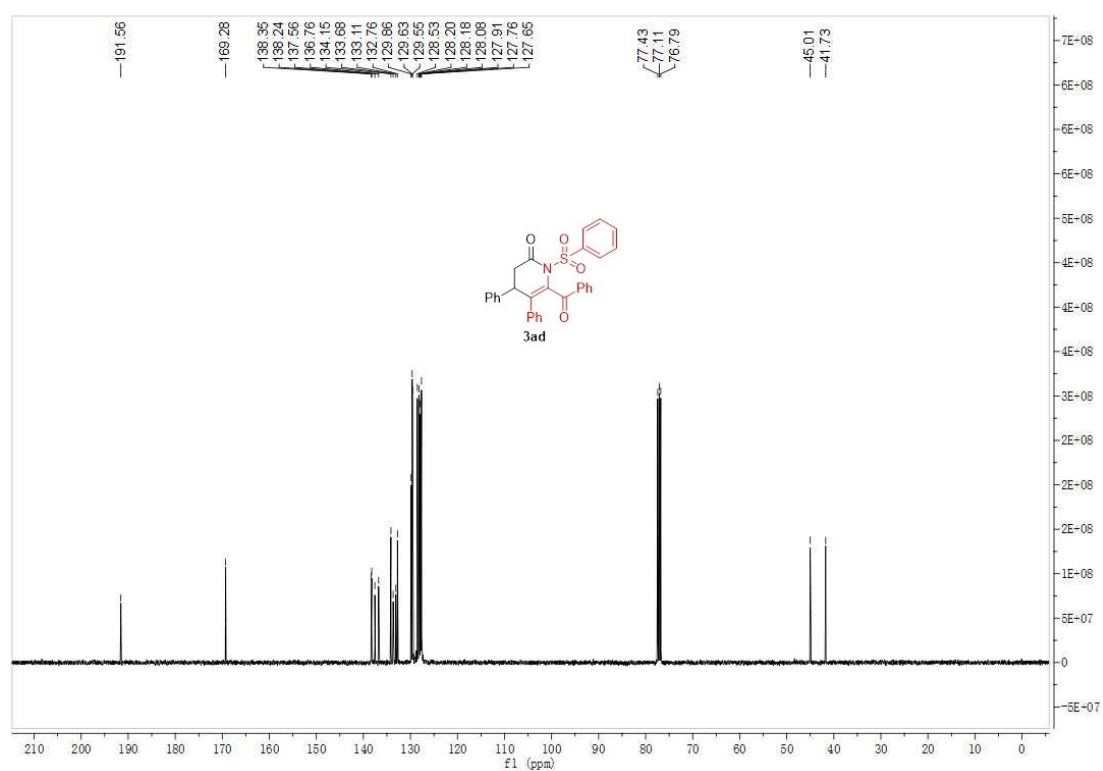

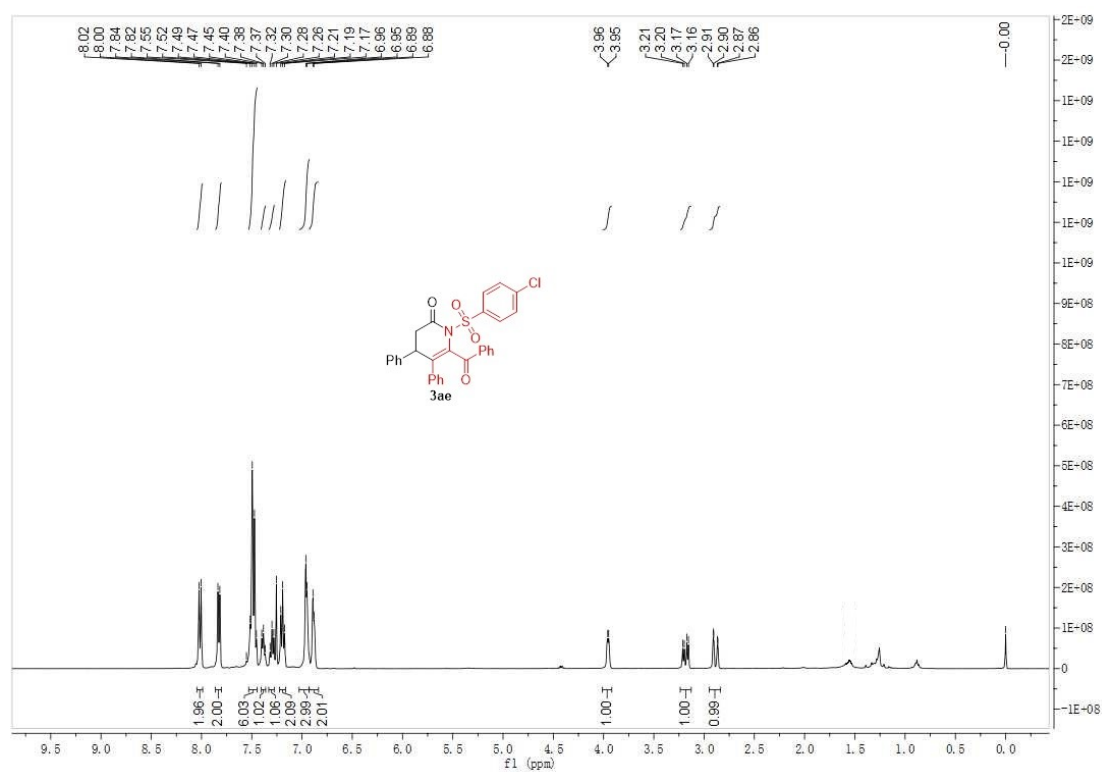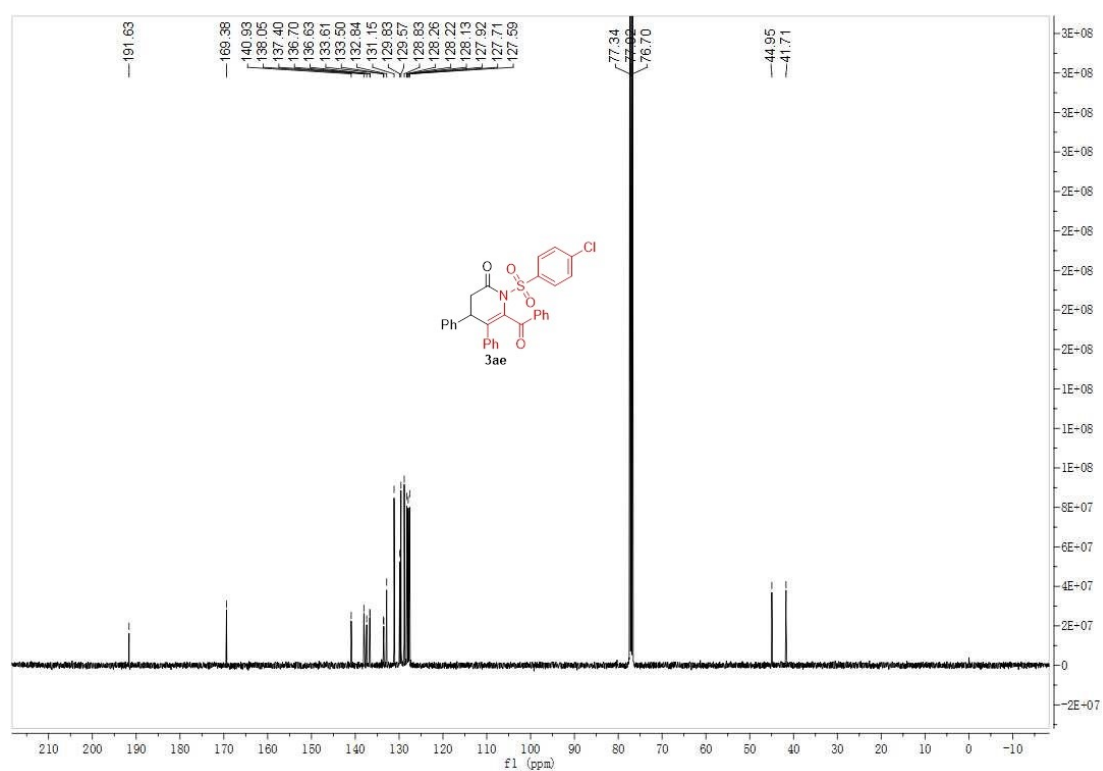

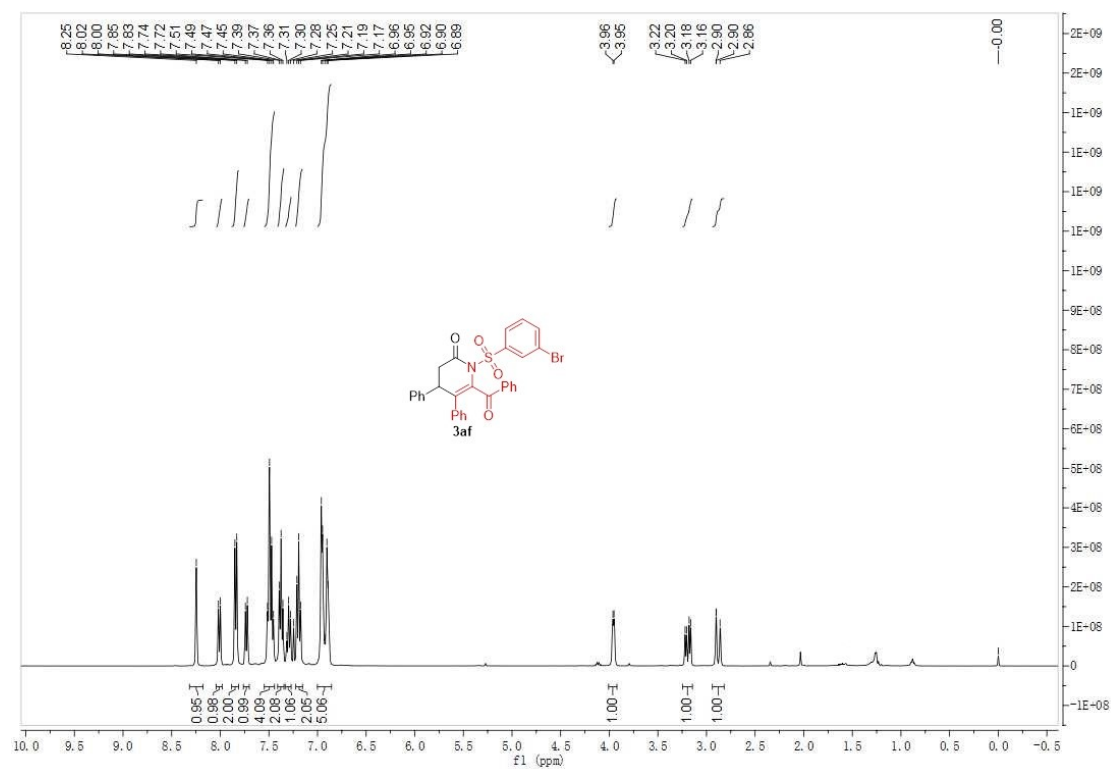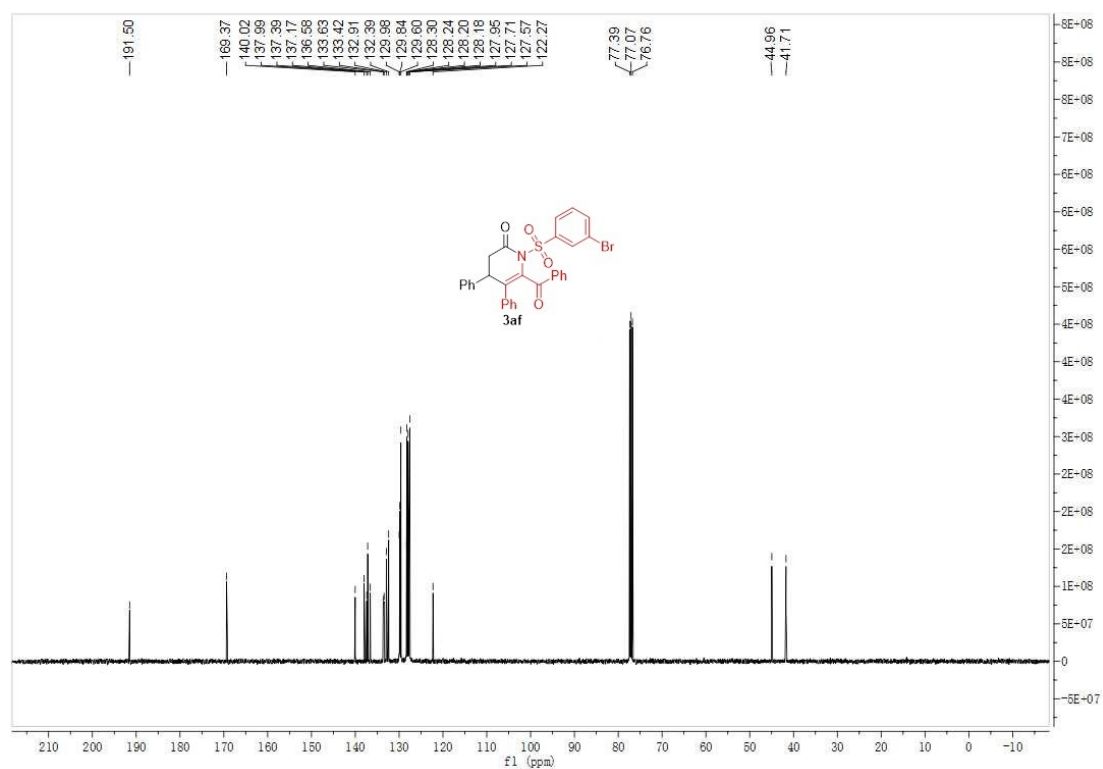

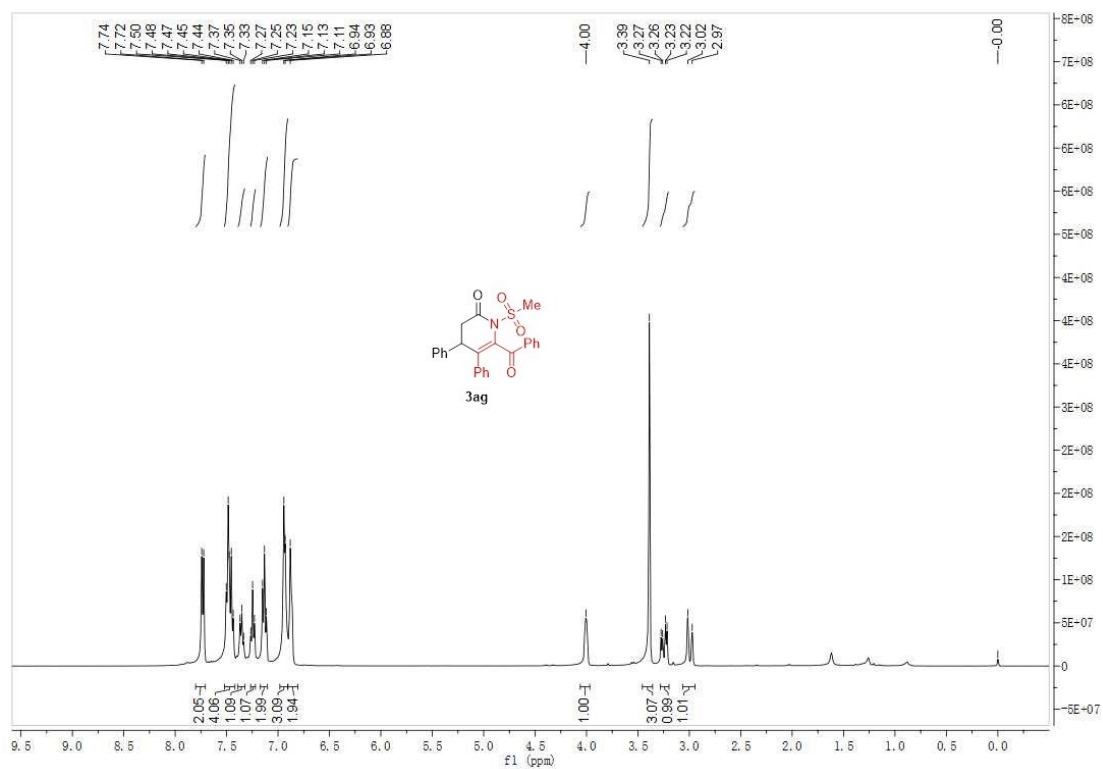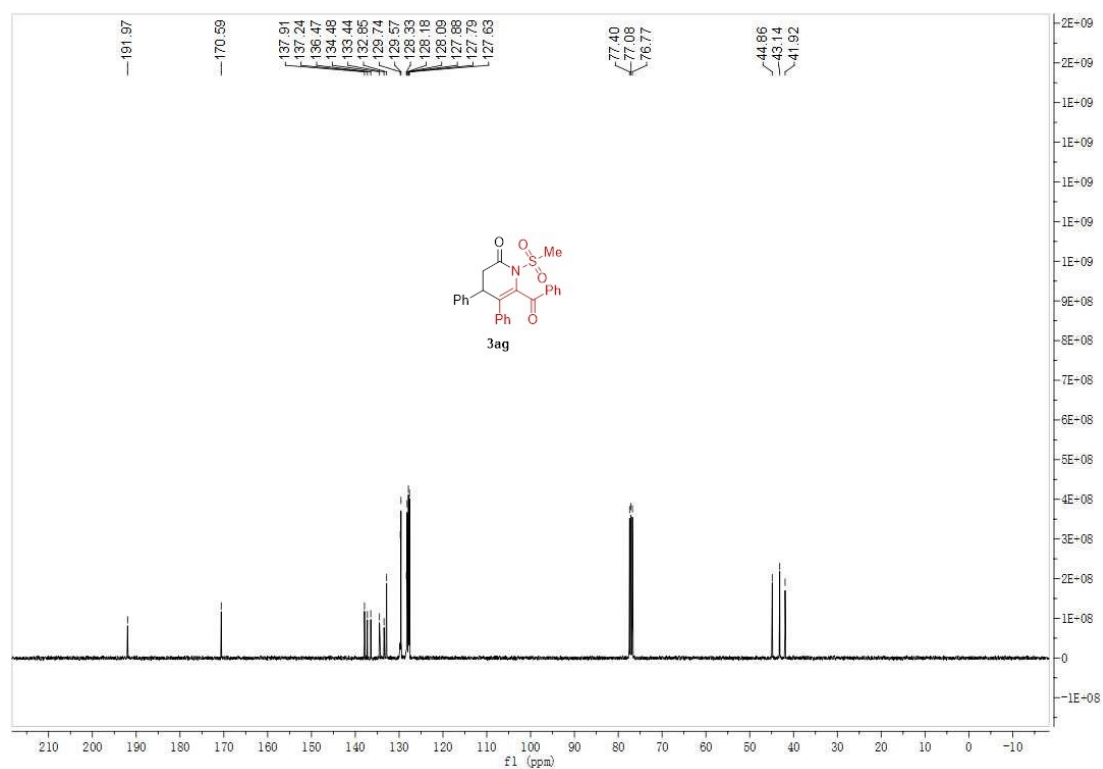

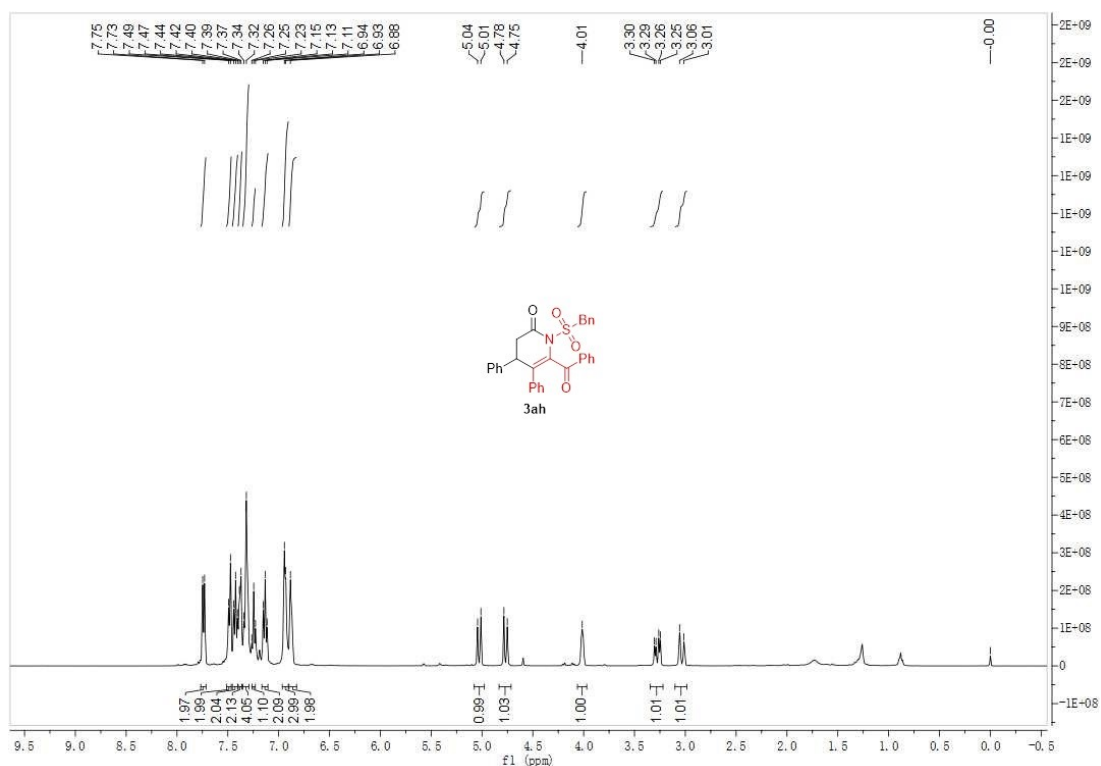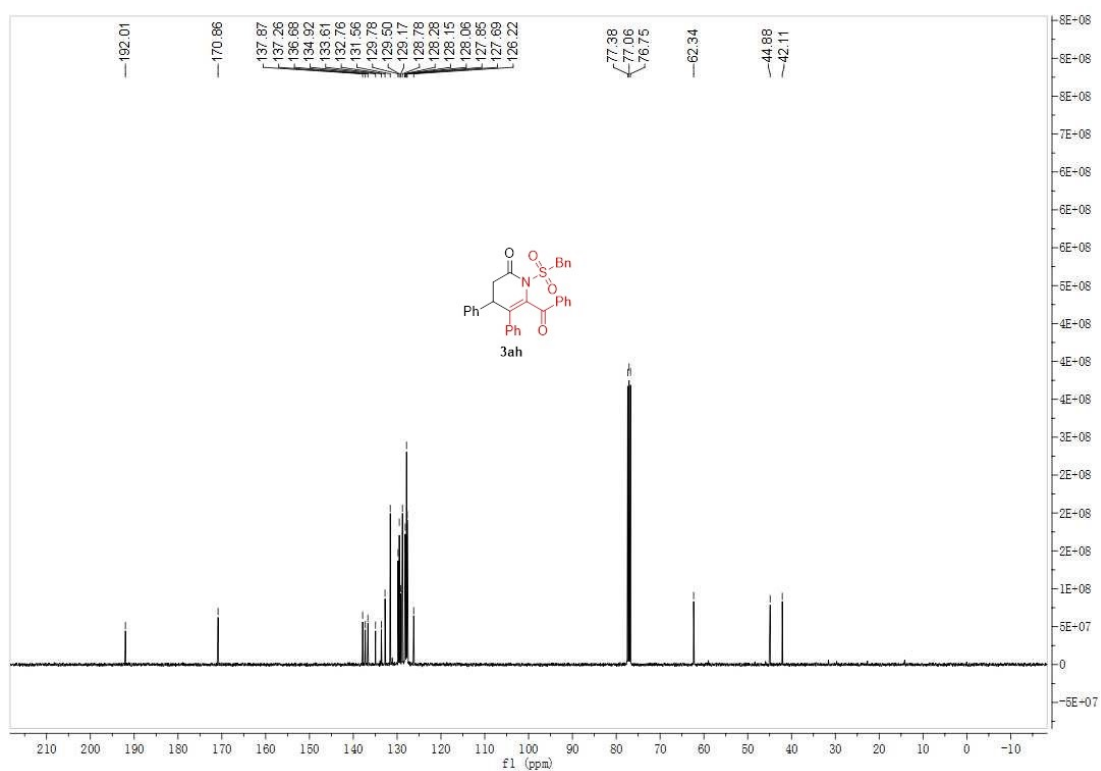

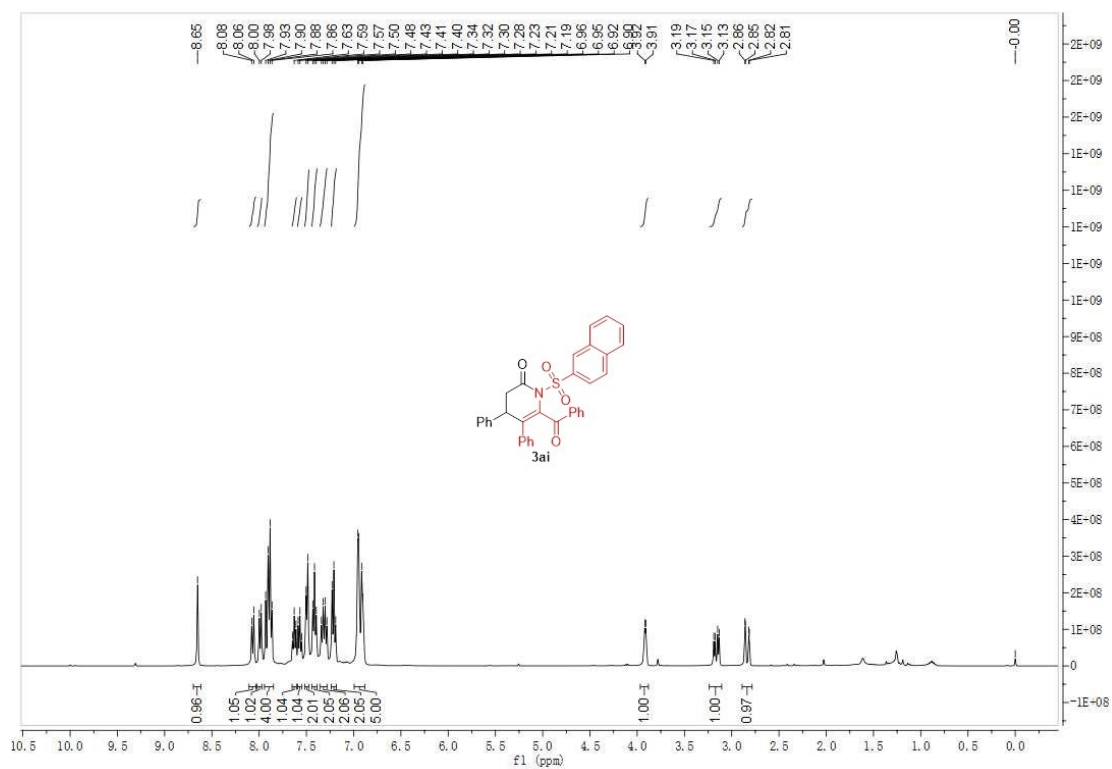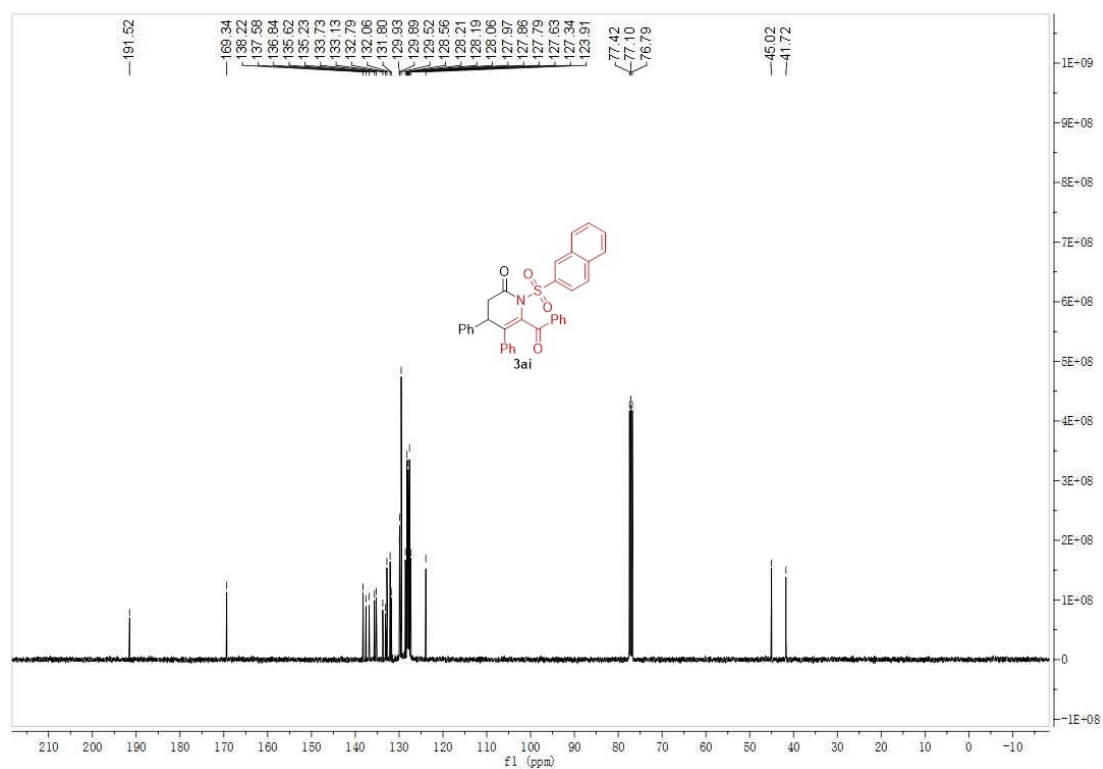

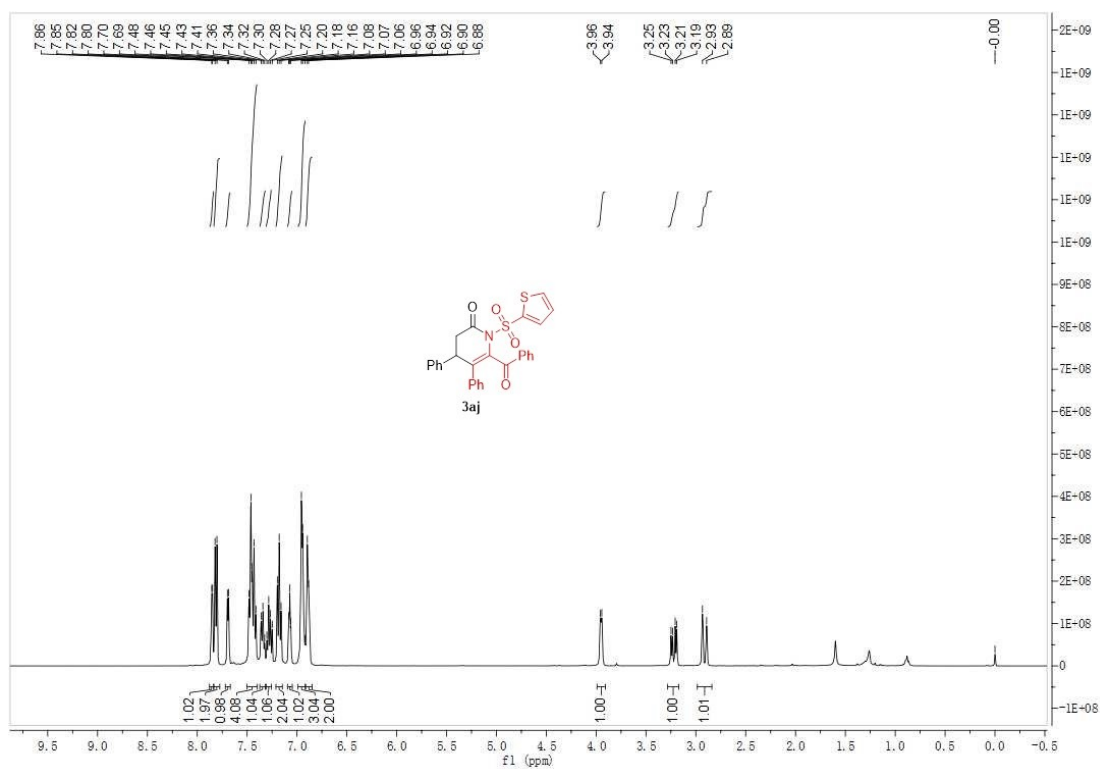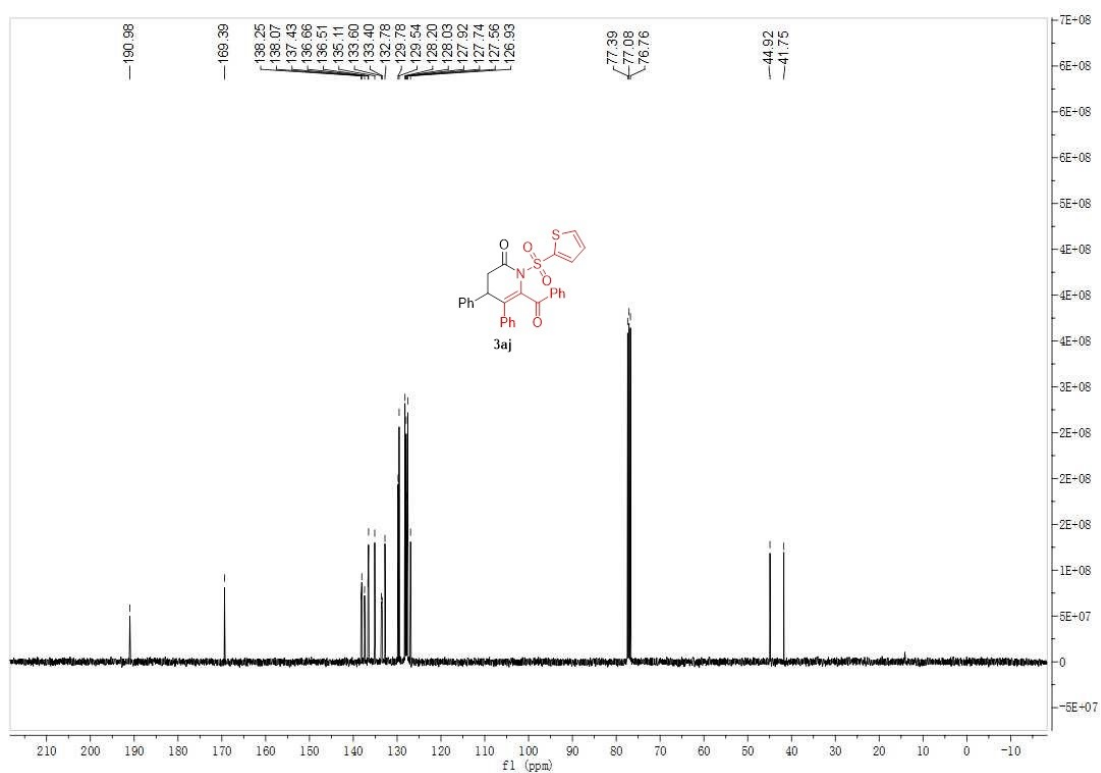

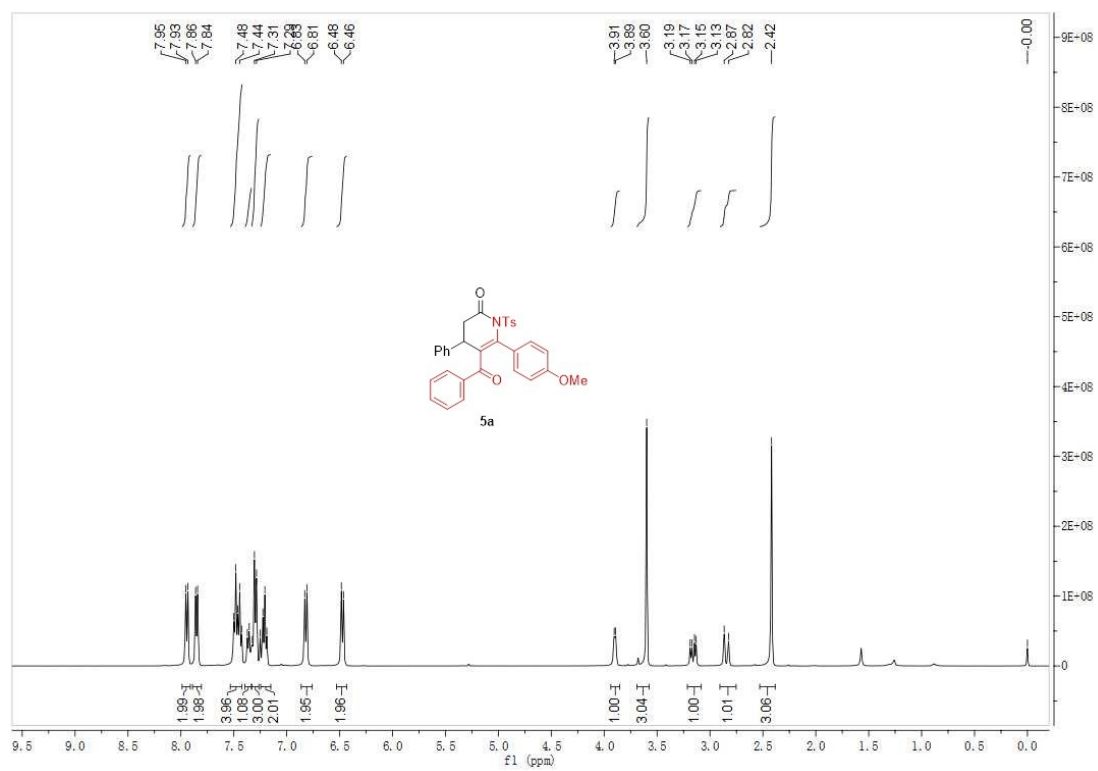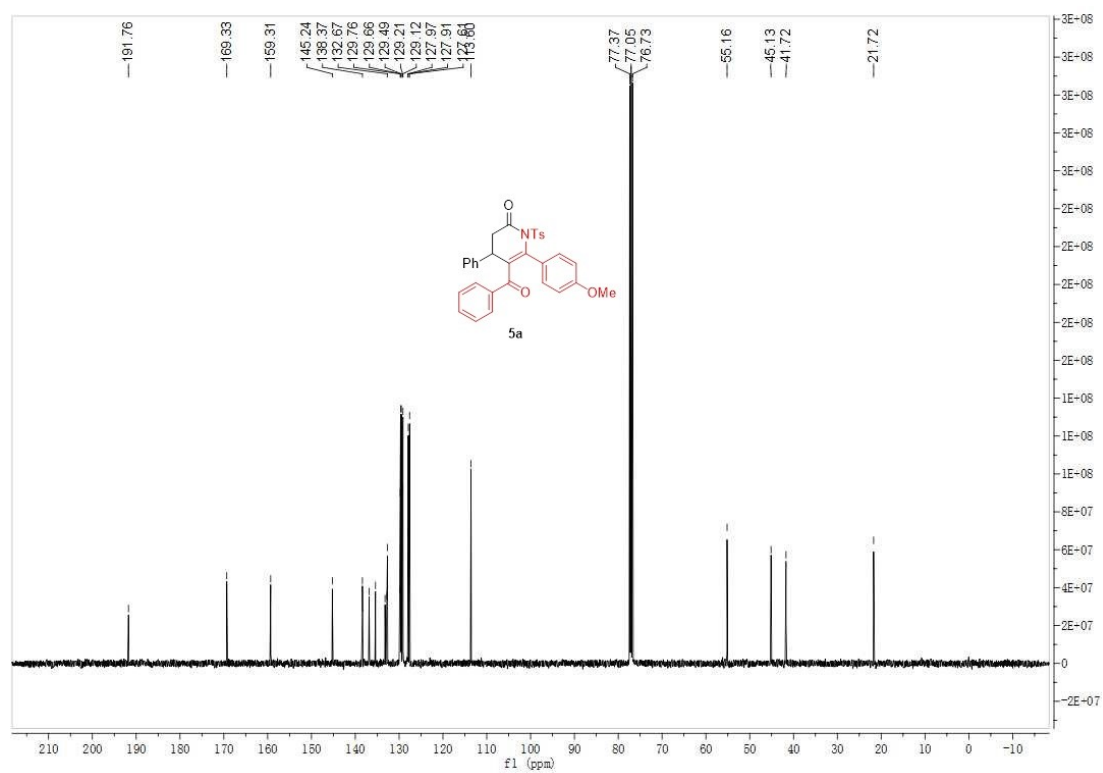

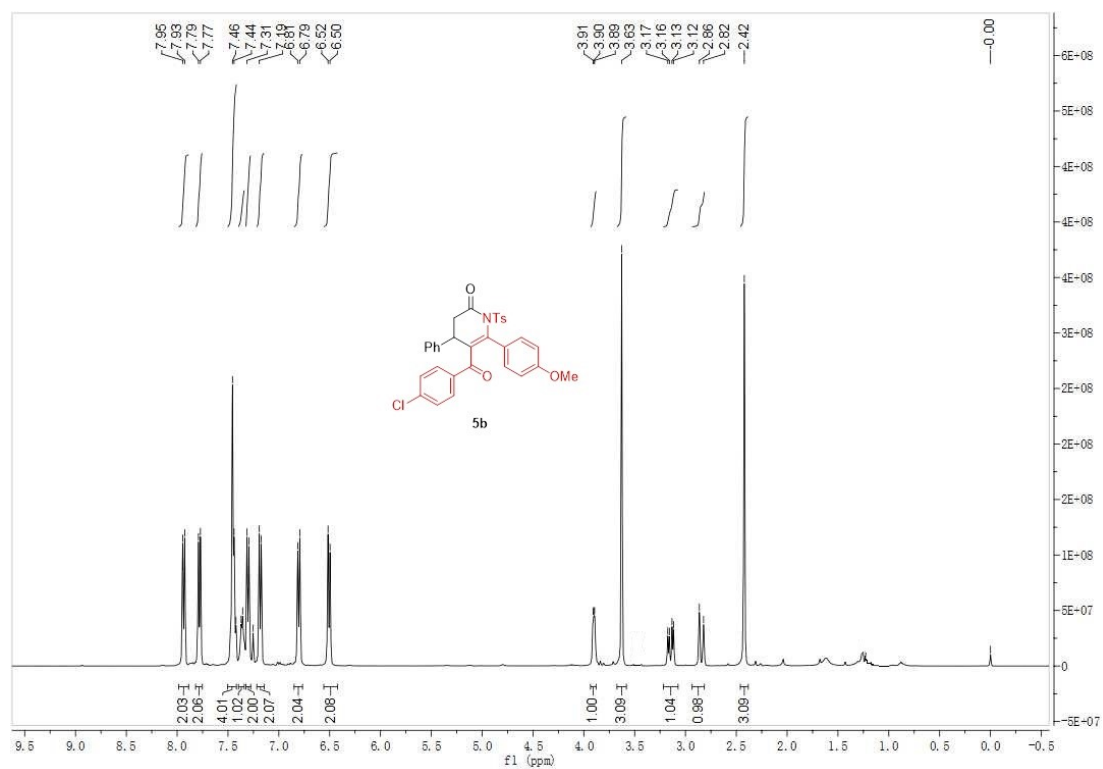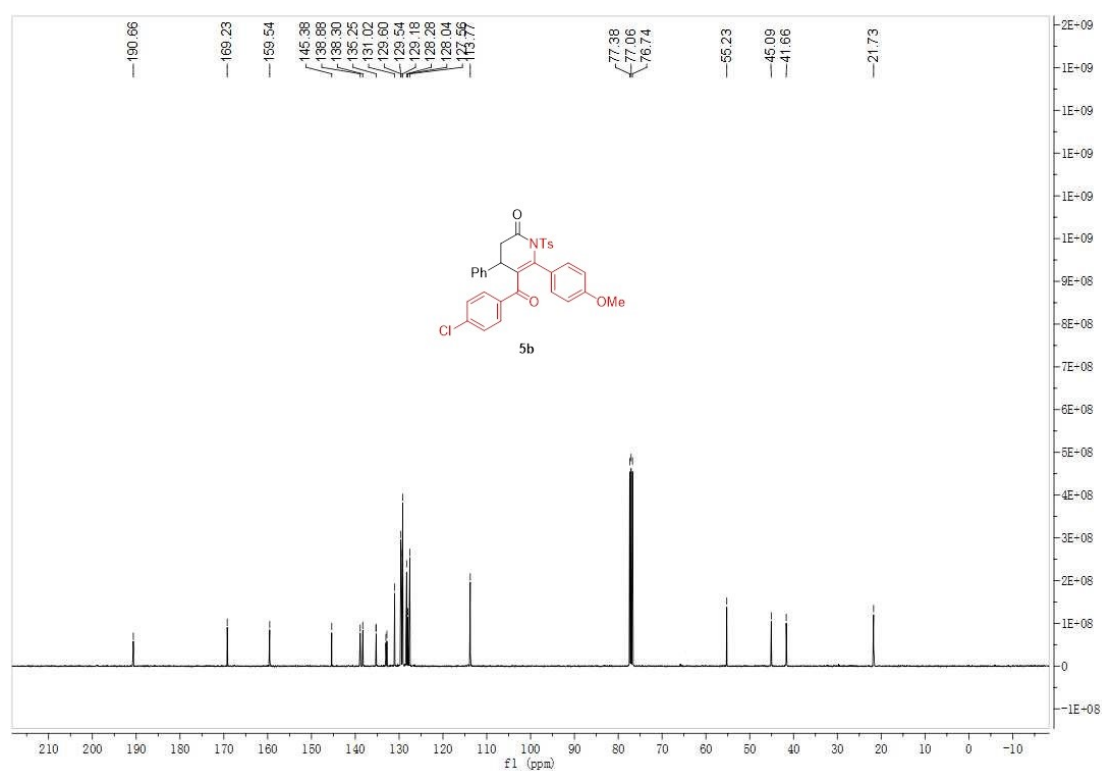

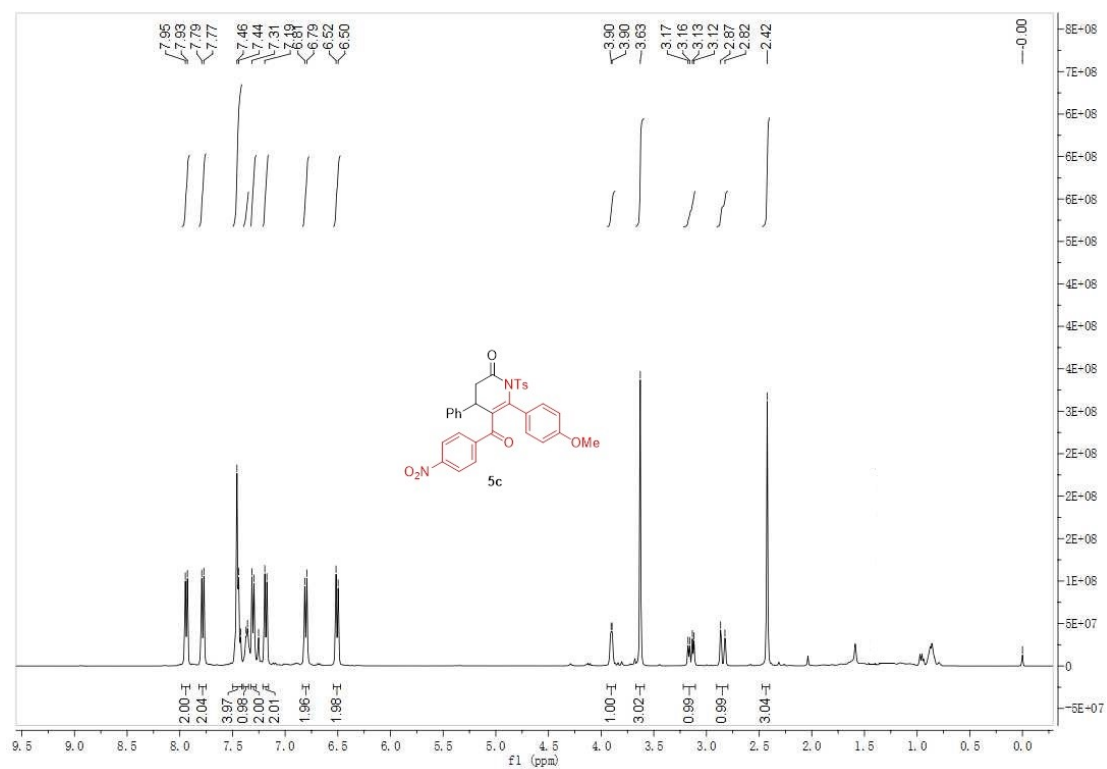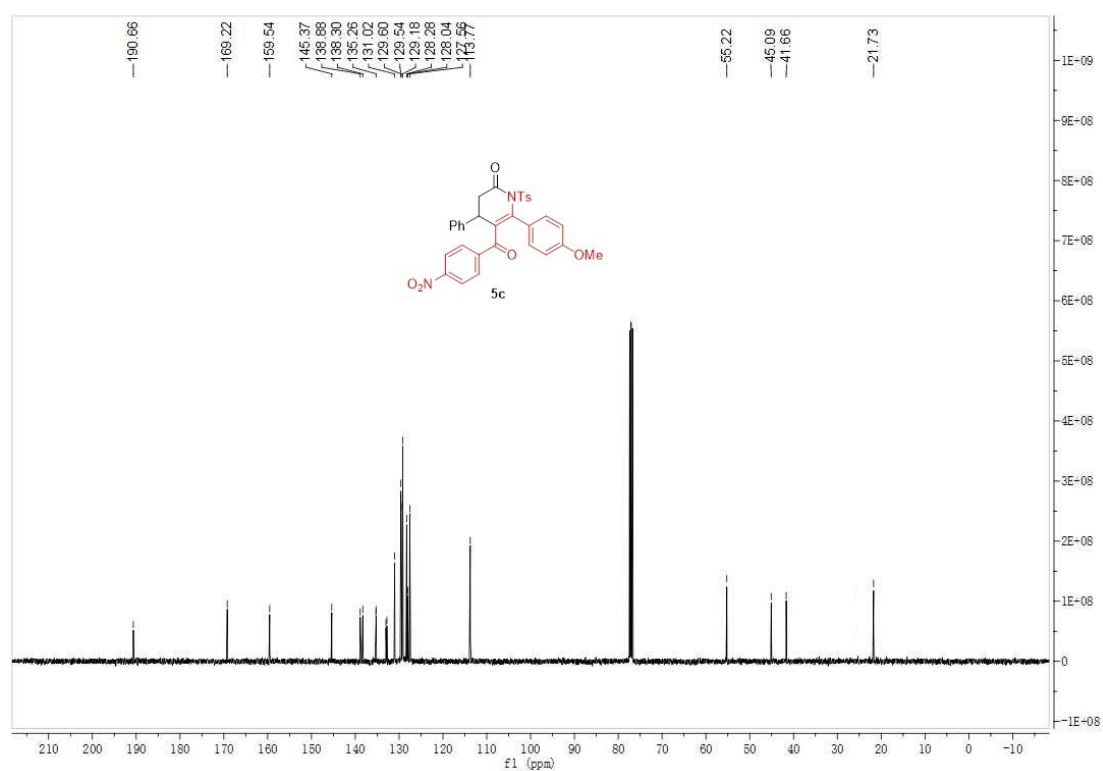

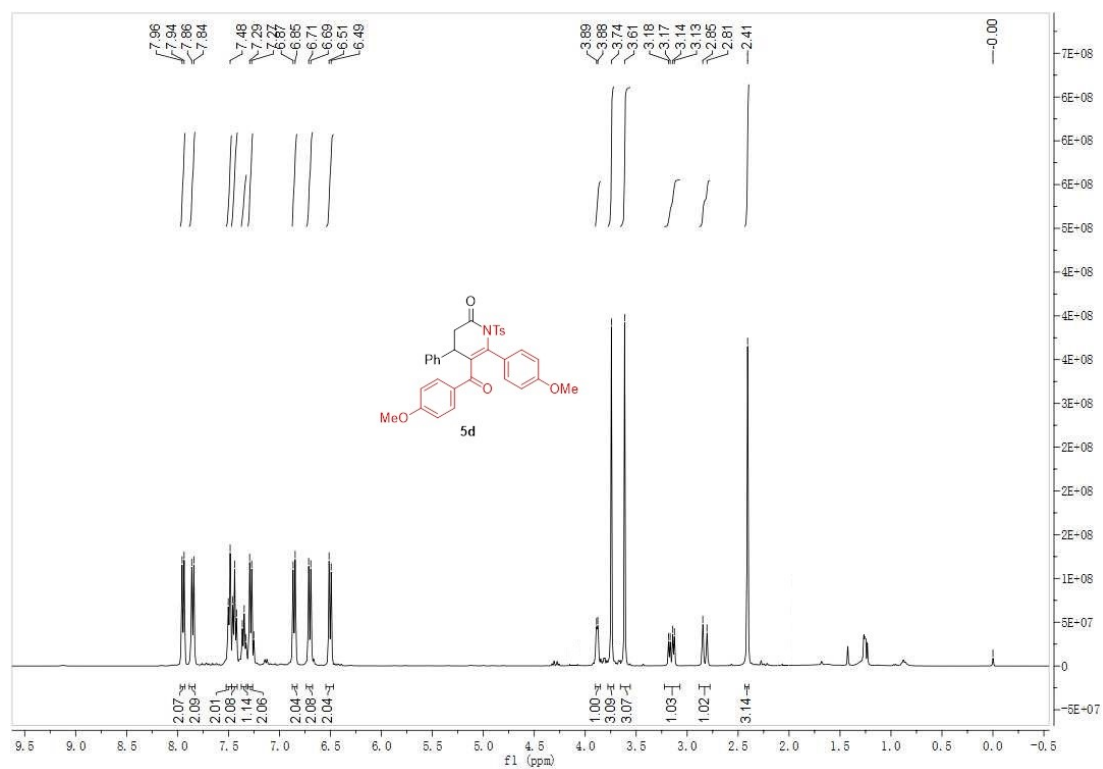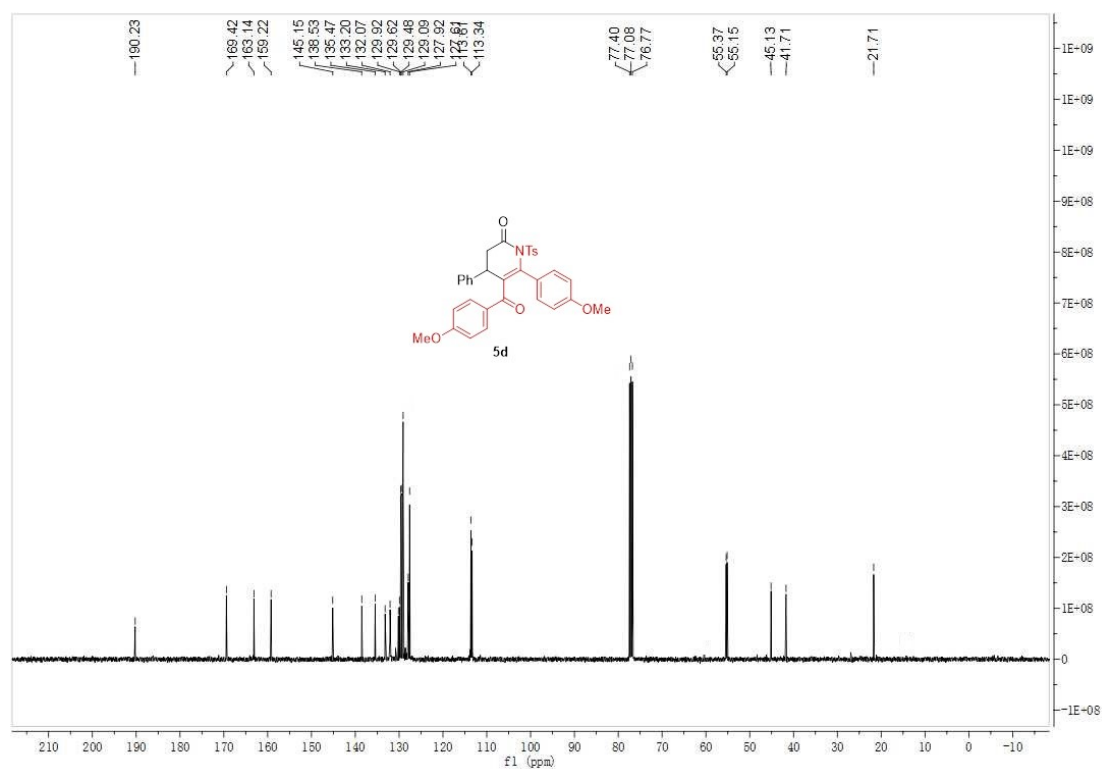

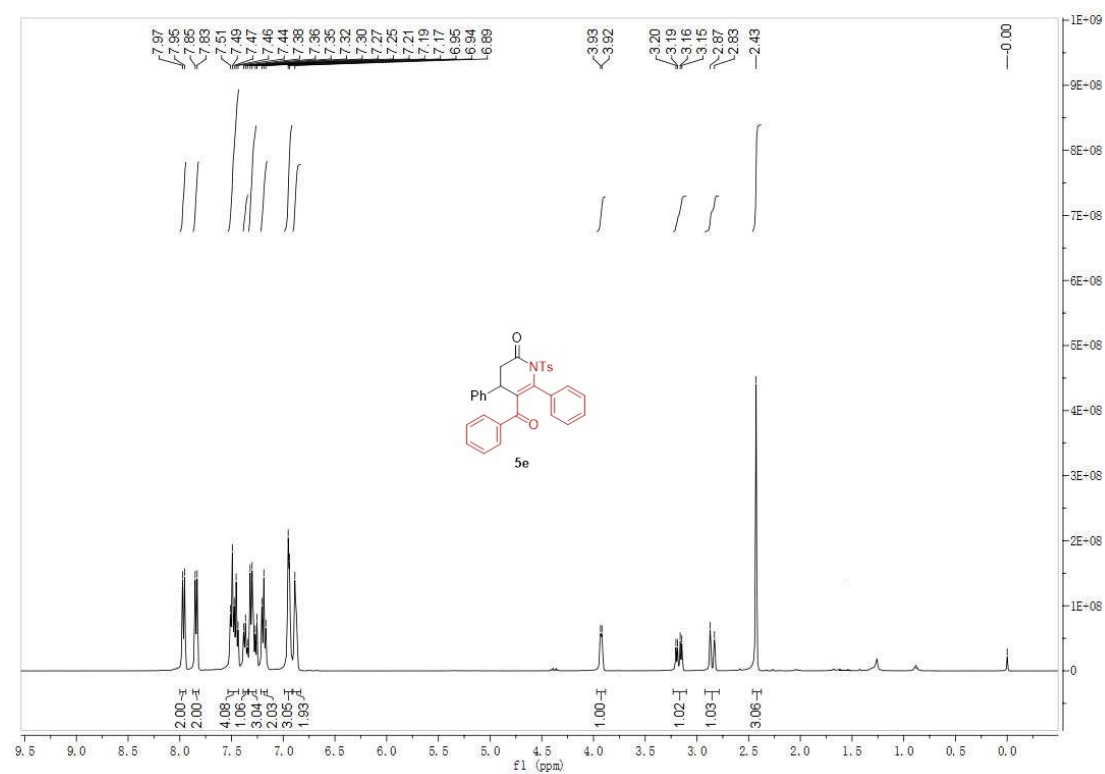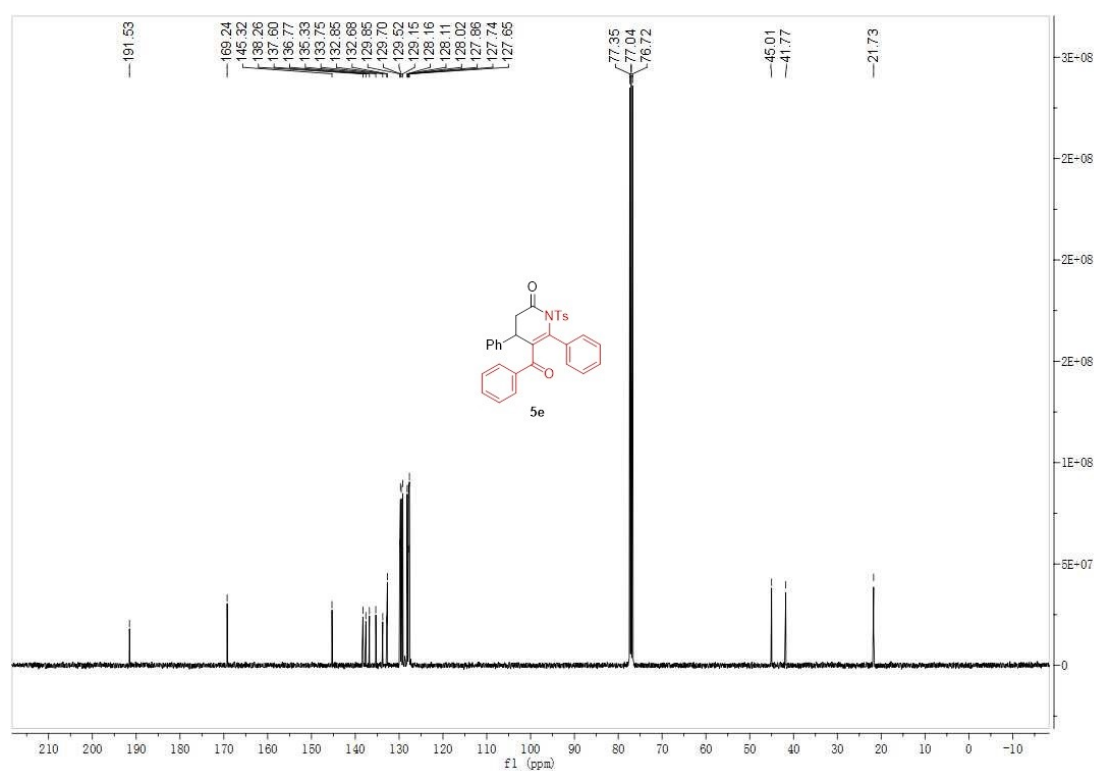

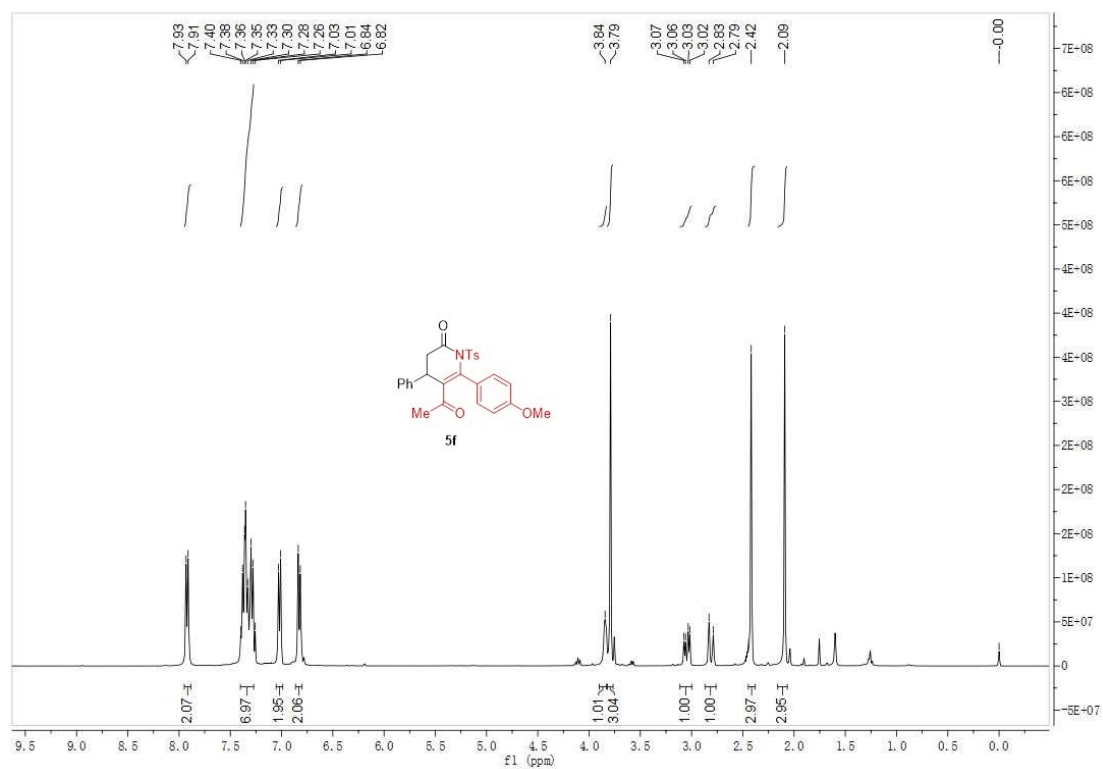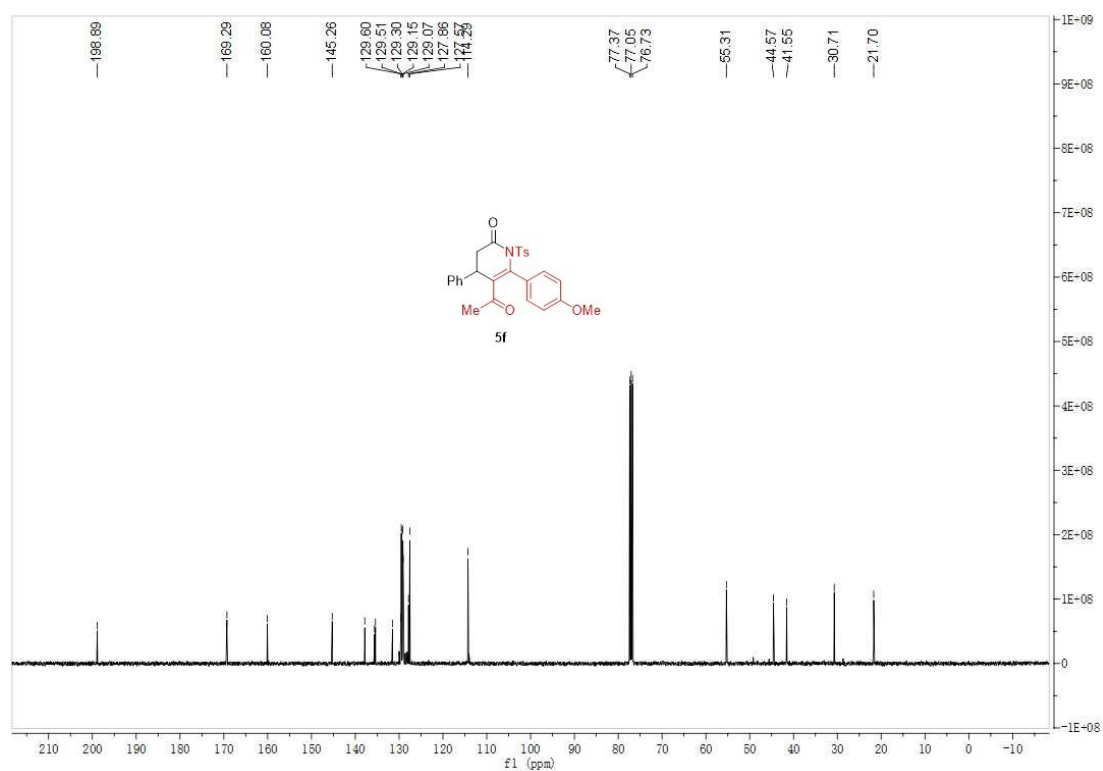

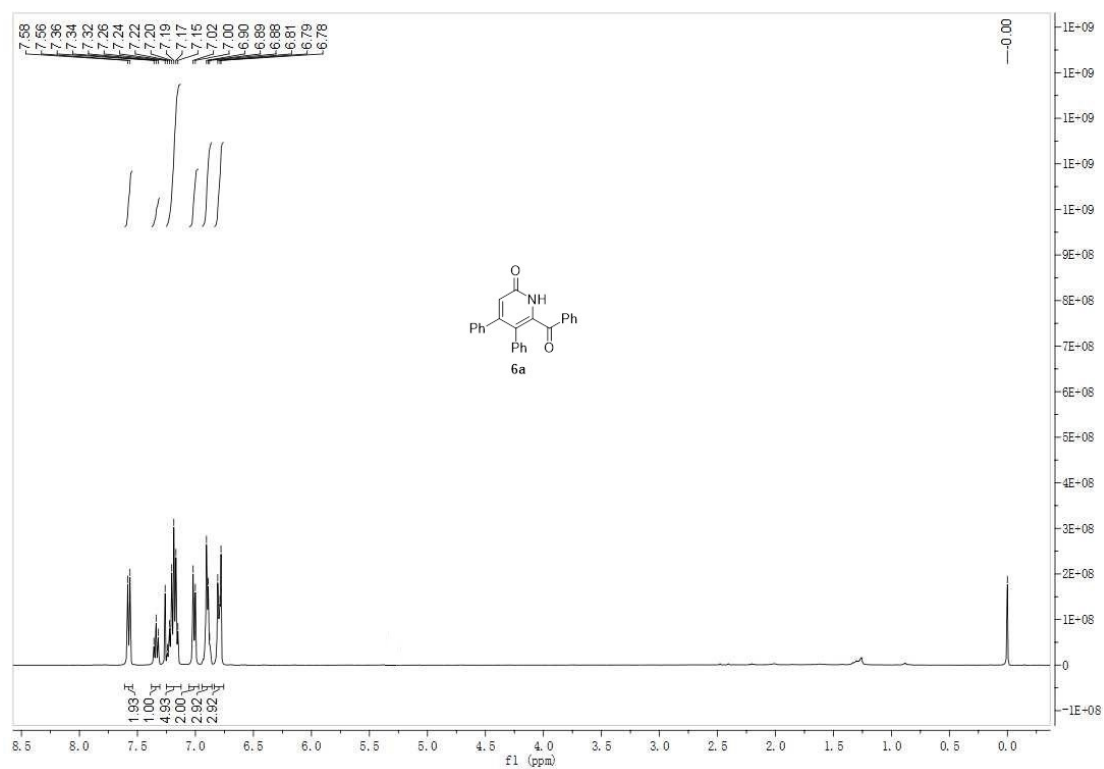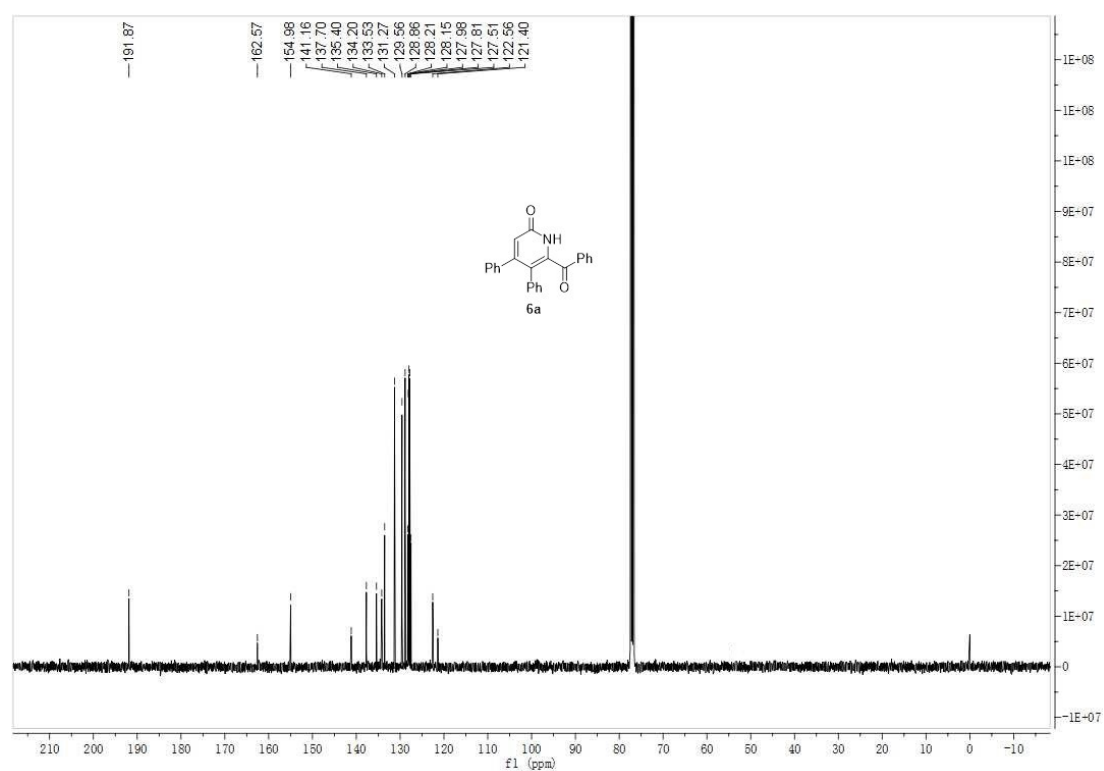

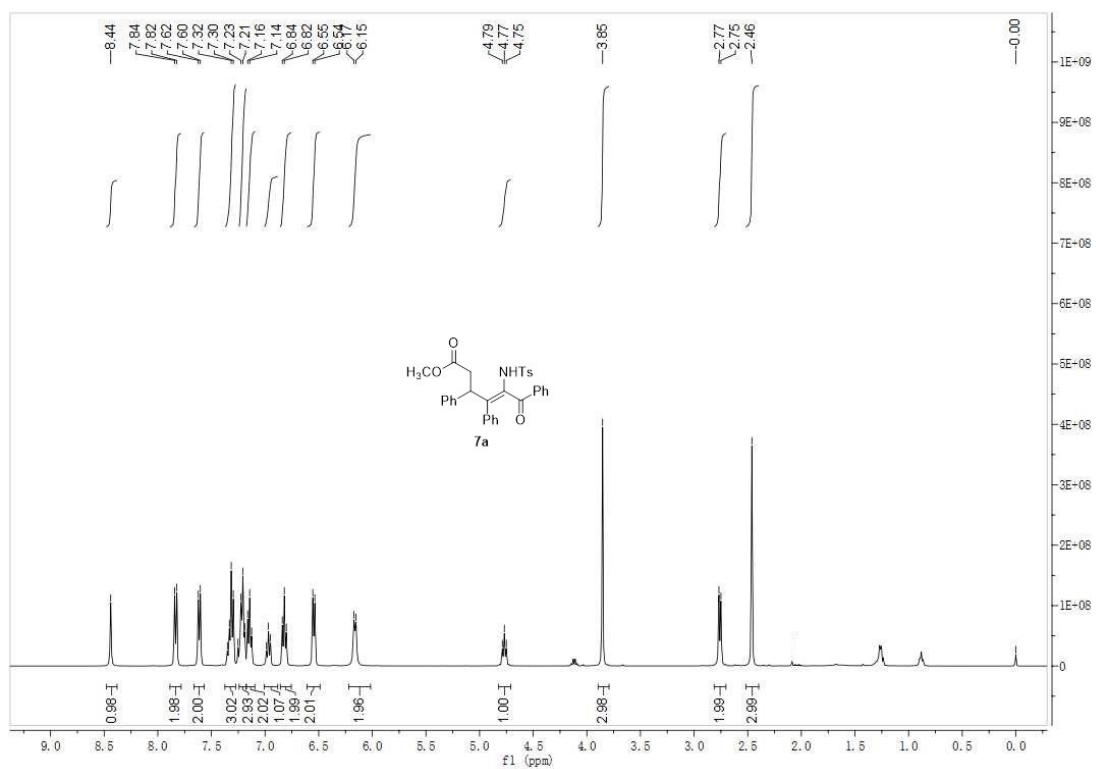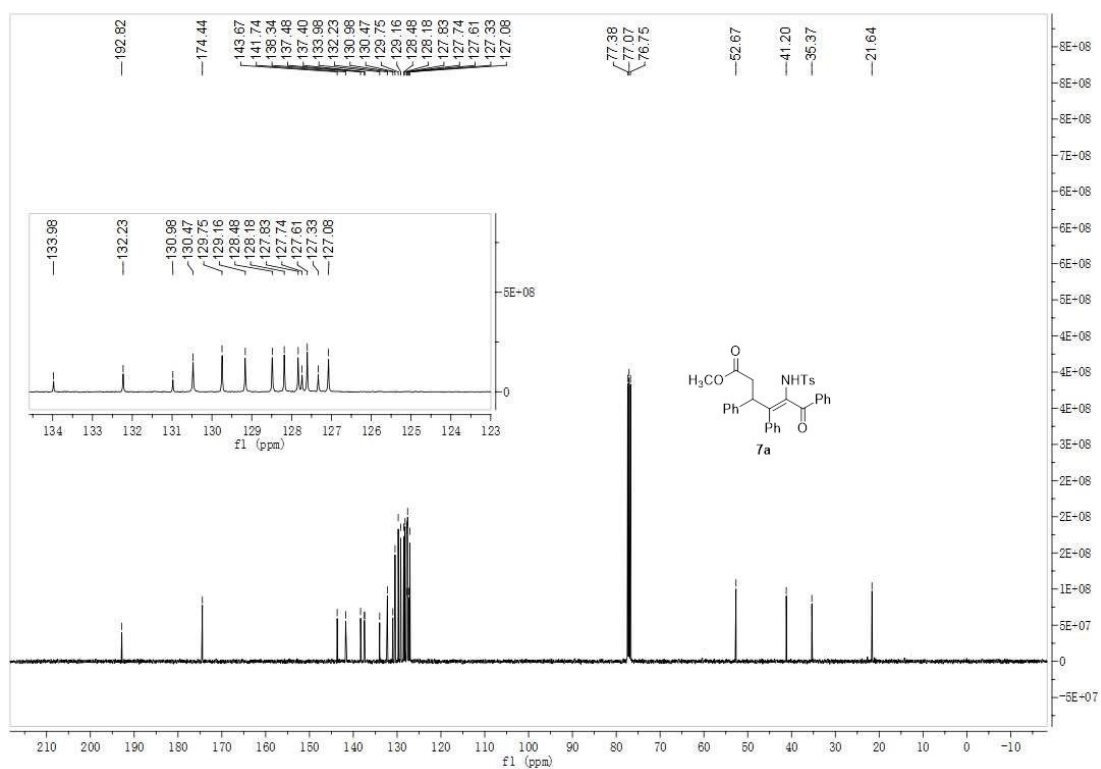

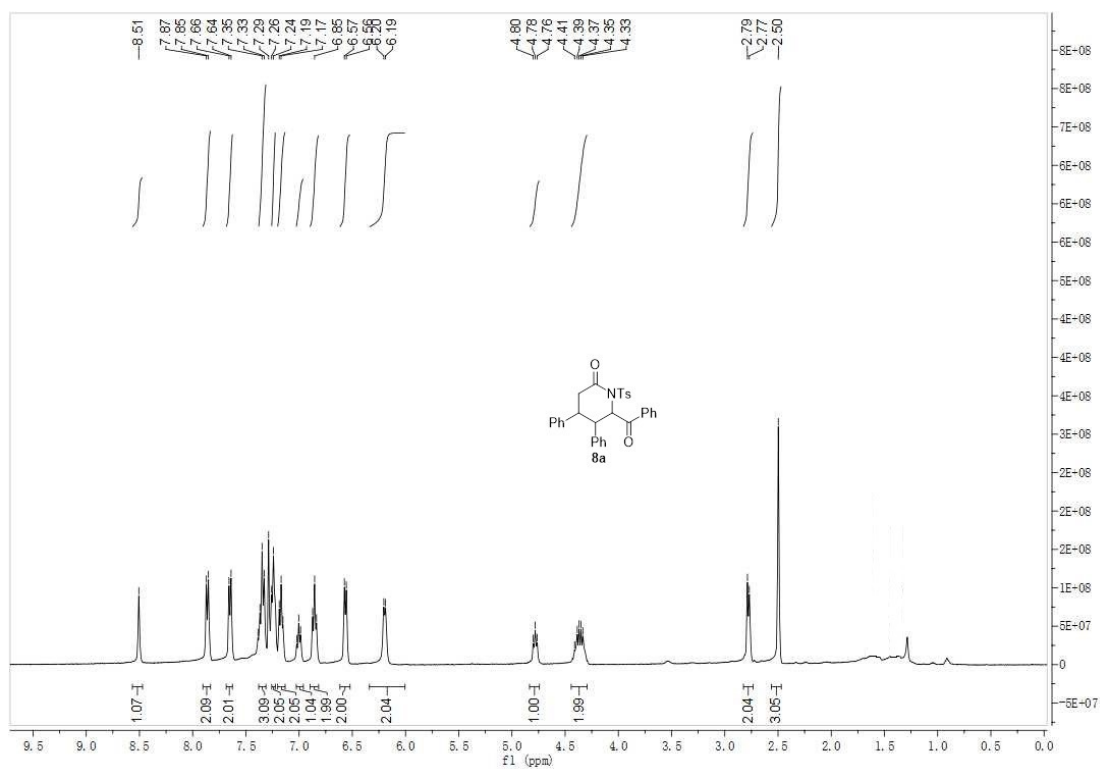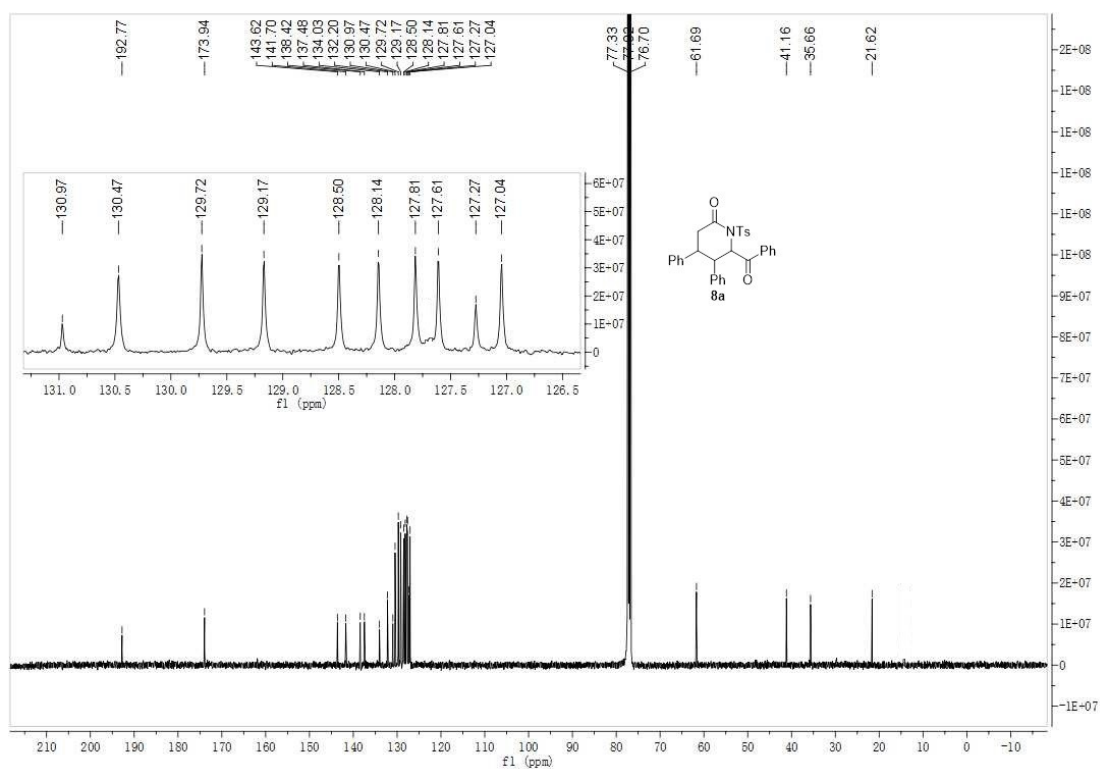

## 7 The HPLC Spectra

HPLC data of compound **3a**: AD-H column, 70:30 hexane:IPA, flow rate 1 mL/min, 254 nm, 25 °C.

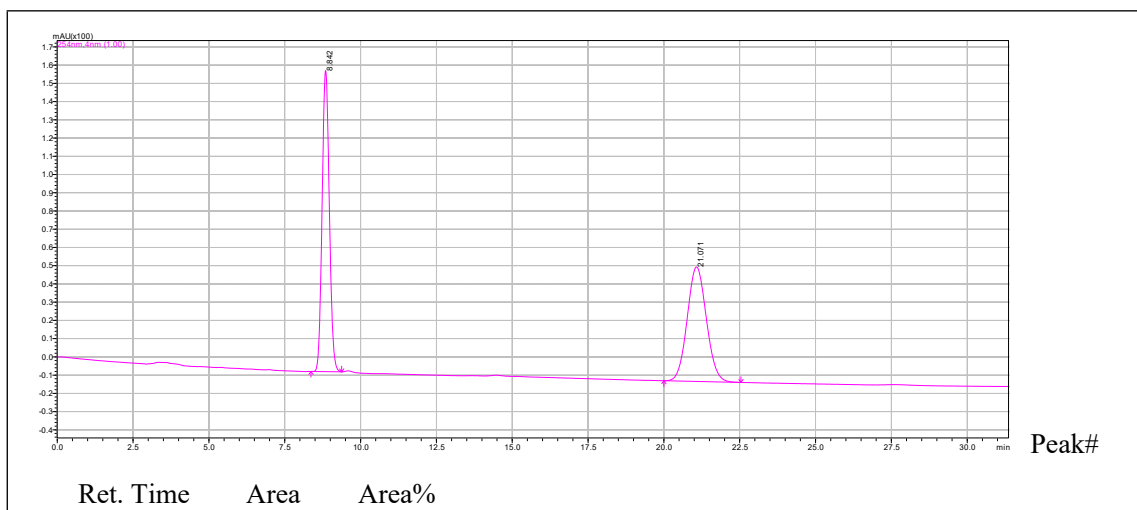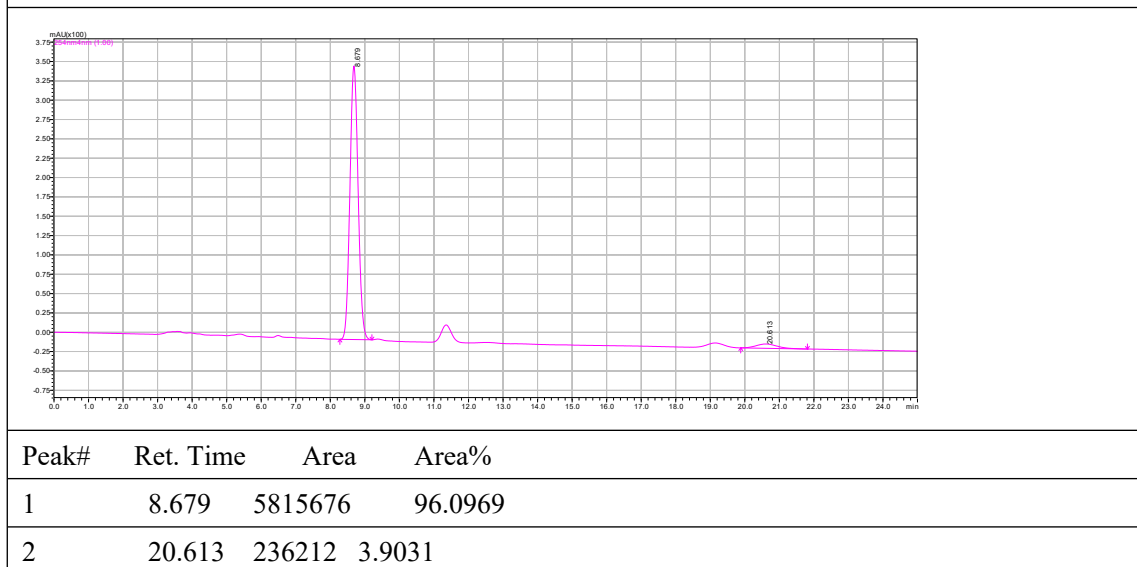

HPLC data of compound **3e**: AD-H column, 70:30 hexane:IPA, flow rate 1 mL/min, 254 nm, 25 °C.

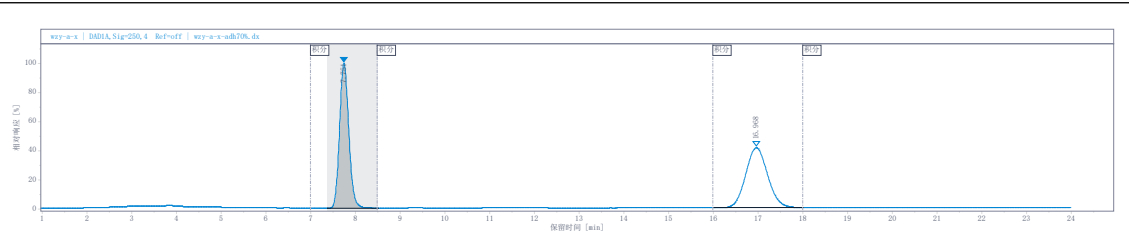

| Peak# | Ret. Time | Area     | Area%  |
|-------|-----------|----------|--------|
| 1     | 7.751     | 3161.013 | 50.303 |
| 2     | 16.968    | 3122.952 | 49.697 |

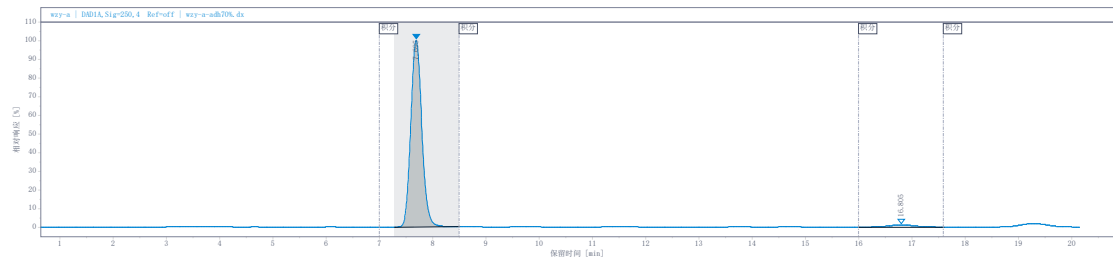

| Peak# | Ret. Time | Area      | Area%  |
|-------|-----------|-----------|--------|
| 1     | 7.695     | 32766.688 | 97.511 |
| 2     | 16.805    | 822.655   | 2.449  |

HPLC data of compound **3g**: AD-H column, 70:30 hexane:IPA, flow rate 1 mL/min, 254 nm, 25 °C.

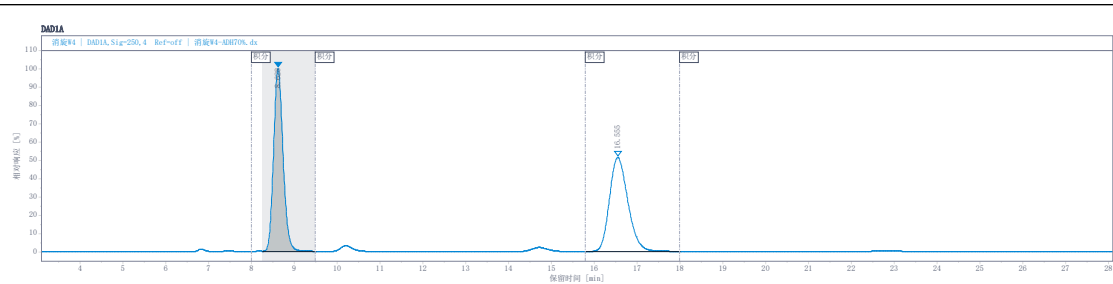

| Peak# | Ret. Time | Area      | Area%  |
|-------|-----------|-----------|--------|
| 1     | 8.628     | 17975.266 | 49.902 |
| 2     | 16.555    | 18046.122 | 50.098 |

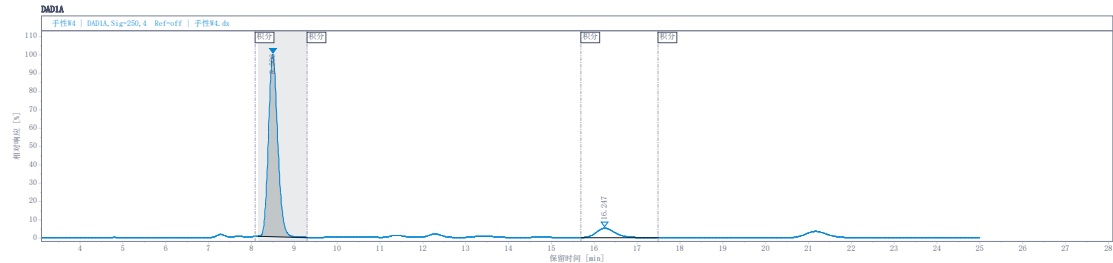

| Peak# | Ret. Time | Area      | Area%  |
|-------|-----------|-----------|--------|
| 1     | 8.506     | 21559.177 | 90.572 |
| 2     | 16.247    | 2244.259  | 9.428  |

HPLC data of compound **3j**: AD-H column, 70:30 hexane:IPA, flow rate 1 mL/min, 254 nm, 25 °C.

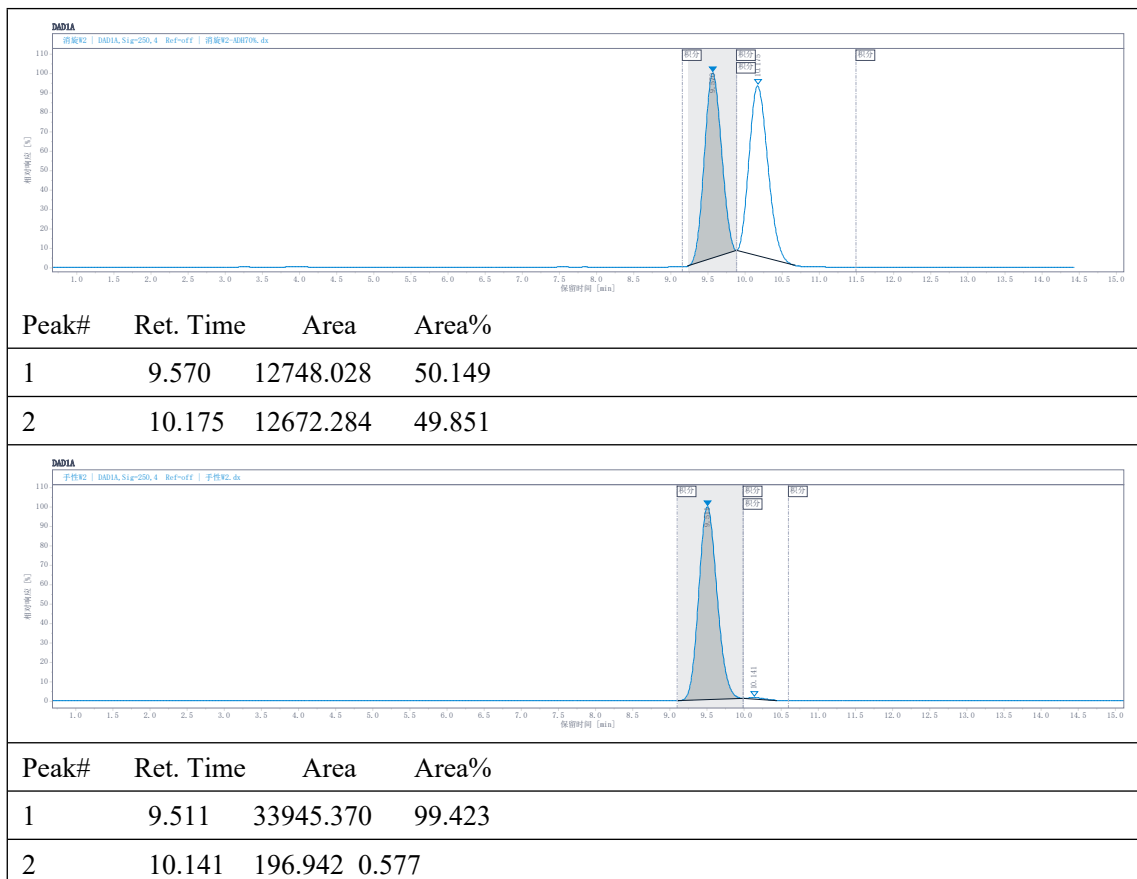

HPLC data of compound **3k**: OD-H column, 70:30 hexane:IPA, flow rate 1 mL/min, 254 nm, 25 °C.

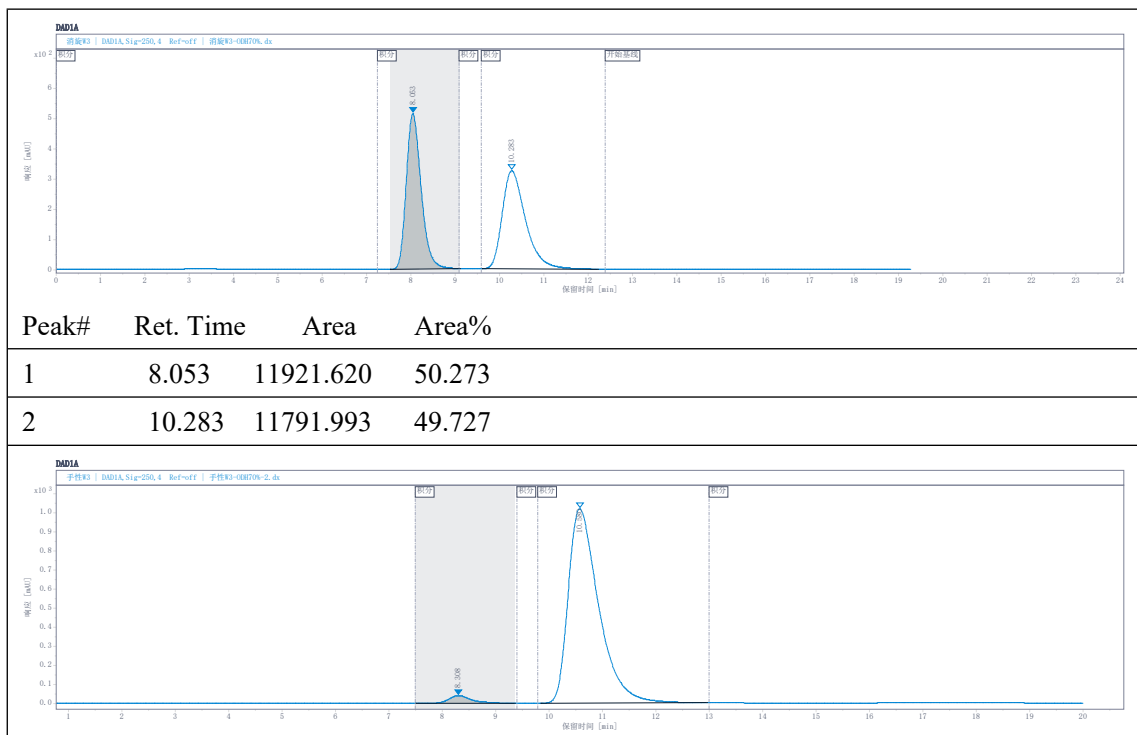

| Peak# | Ret. Time | Area      | Area%  |
|-------|-----------|-----------|--------|
| 1     | 8.308     | 1187.785  | 2.863  |
| 2     | 10.580    | 40297.930 | 97.137 |

HPLC data of compound **3p**: AD-H column, 70:30 hexane:IPA, flow rate 1 mL/min, 254 nm, 25 °C.

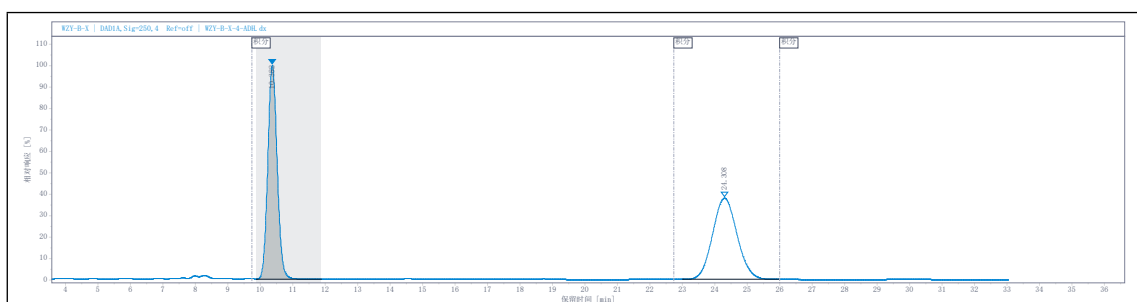

| Peak# | Ret. Time | Area     | Area%  |
|-------|-----------|----------|--------|
| 1     | 10.382    | 4045.787 | 49.979 |
| 2     | 24.308    | 4049.169 | 50.021 |

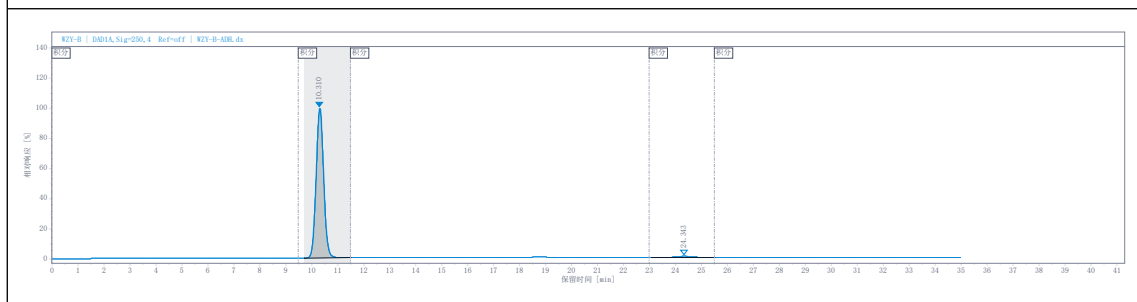

| Peak# | Ret. Time | Area      | Area%  |
|-------|-----------|-----------|--------|
| 1     | 10.310    | 19568.095 | 97.847 |
| 2     | 24.343    | 430.539   | 2.153  |

HPLC data of compound **3ad**: AD-H column, 70:30 hexane:IPA, flow rate 1 mL/min, 254 nm, 25 °C.

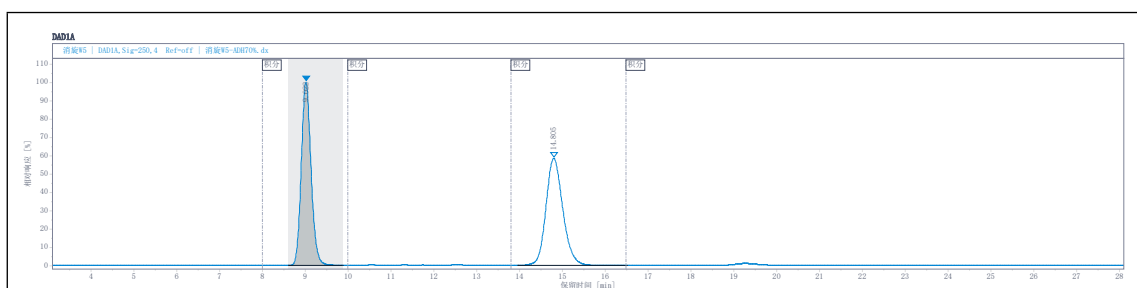

| Peak# | Ret. Time | Area      | Area%  |
|-------|-----------|-----------|--------|
| 1     | 9.022     | 20009.394 | 49.608 |
| 2     | 14.805    | 20325.417 | 50.392 |

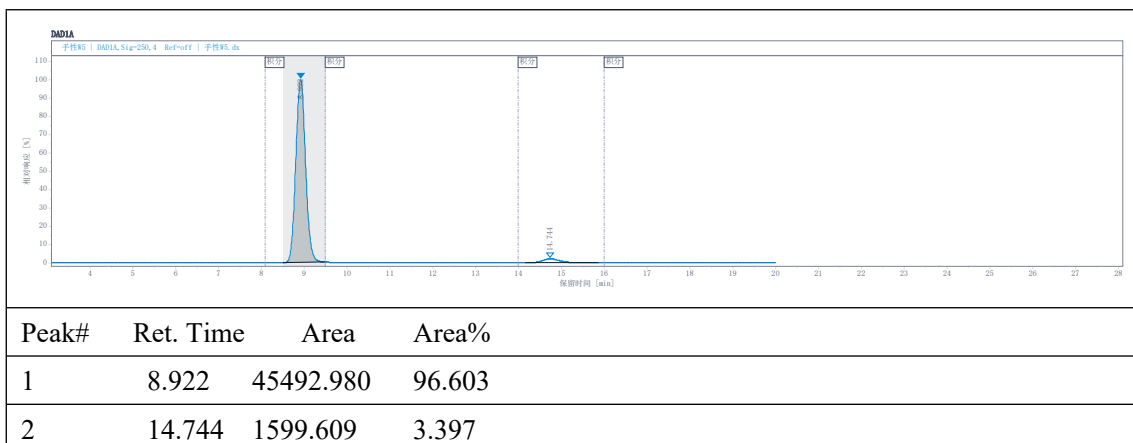

HPLC data of compound **3ag**: AD-H column, 70:30 hexane:IPA, flow rate 1 mL/min, 254 nm, 25 °C.

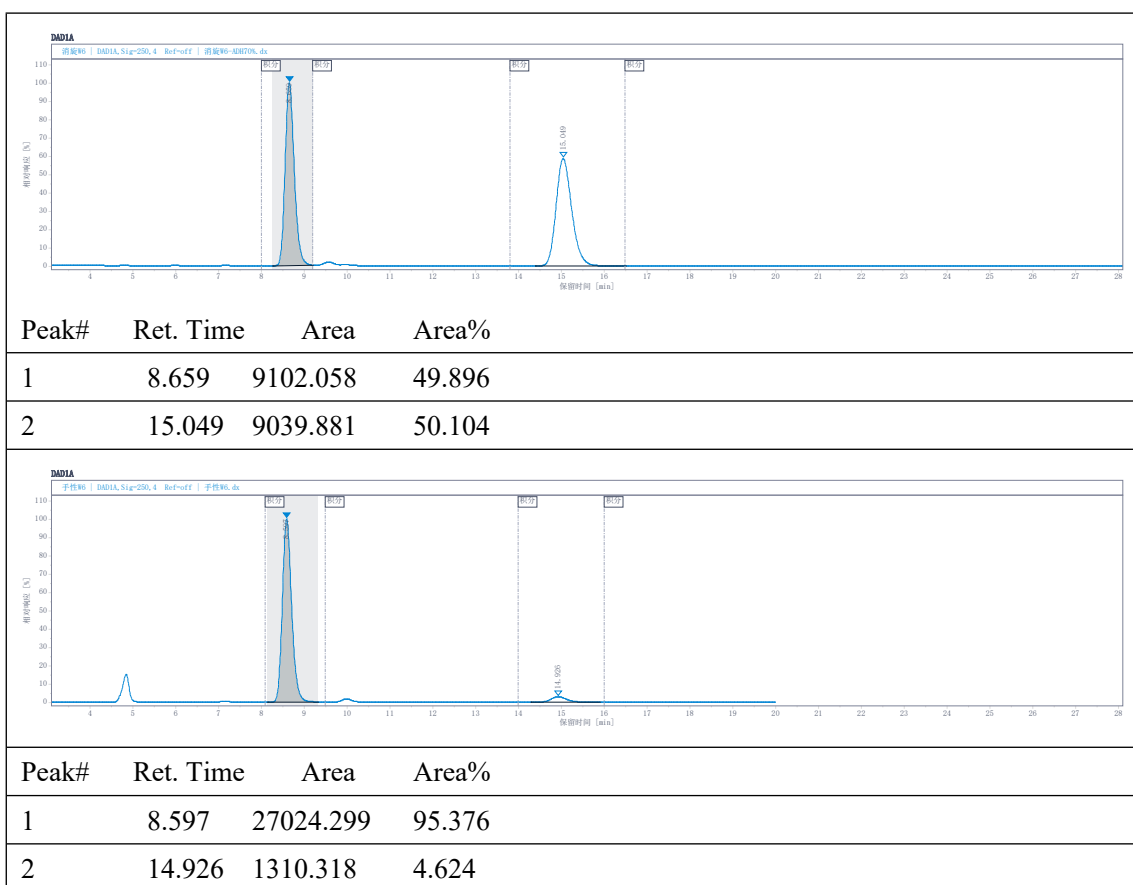

HPLC data of compound **5c**: AD-H column, 70:30 hexane:IPA, flow rate 1 mL/min, 254 nm, 25 °C.

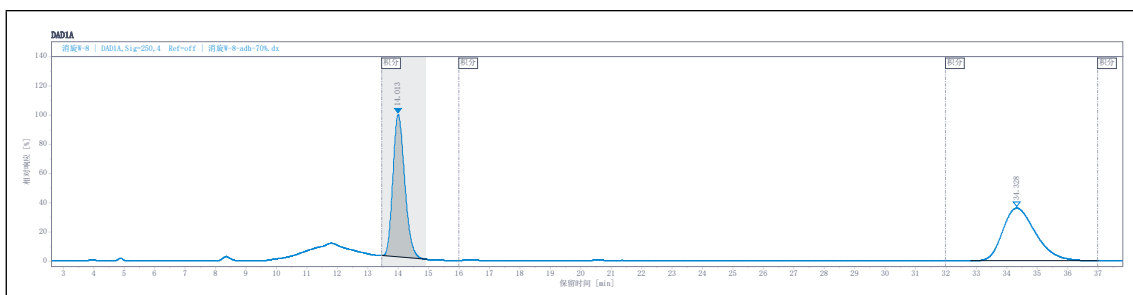

| Peak# | Ret. Time | Area      | Area%  |
|-------|-----------|-----------|--------|
| 1     | 14.013    | 12115.592 | 49.509 |
| 2     | 34.328    | 12355.706 | 50.491 |

  
  

| Peak# | Ret. Time | Area      | Area%  |
|-------|-----------|-----------|--------|
| 1     | 13.839    | 11619.161 | 96.659 |
| 2     | 33.598    | 401.629   | 3.341  |

HPLC data of compound **5d**: OD-H column, 70:30 hexane:IPA, flow rate 1 mL/min, 254 nm, 25 °C.

  

| Peak# | Ret. Time | Area     | Area%  |
|-------|-----------|----------|--------|
| 1     | 19.094    | 6474.733 | 49.987 |
| 2     | 40.740    | 6478.154 | 50.013 |

  
  

| Peak# | Ret. Time | Area    | Area%  |
|-------|-----------|---------|--------|
| 1     | 19.203    | 506.305 | 99.996 |
| 2     | 40.720    | 0.023   | 0.004  |

HPLC data of compound **8a**: OD-H column, 70:30 hexane:IPA, flow rate 1 mL/min, 254 nm, 25 °C.

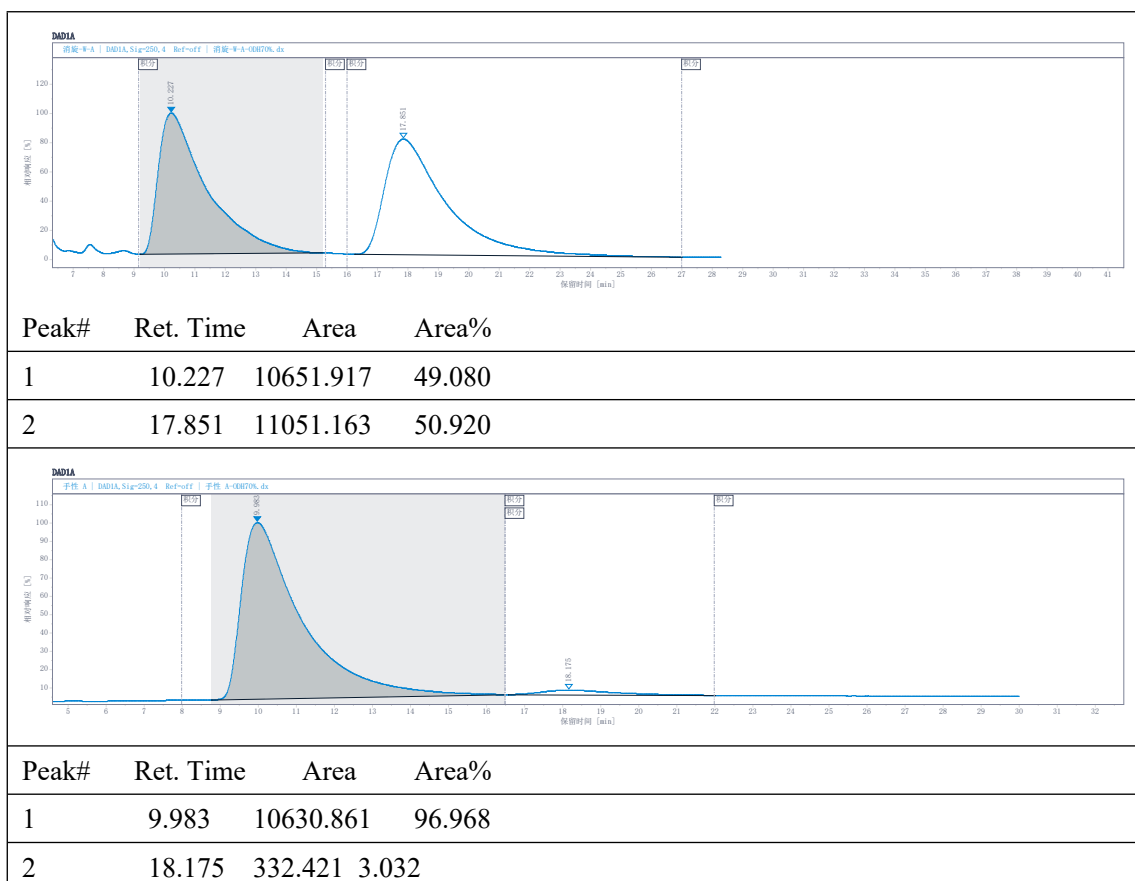

## 8 The data of crystal structure

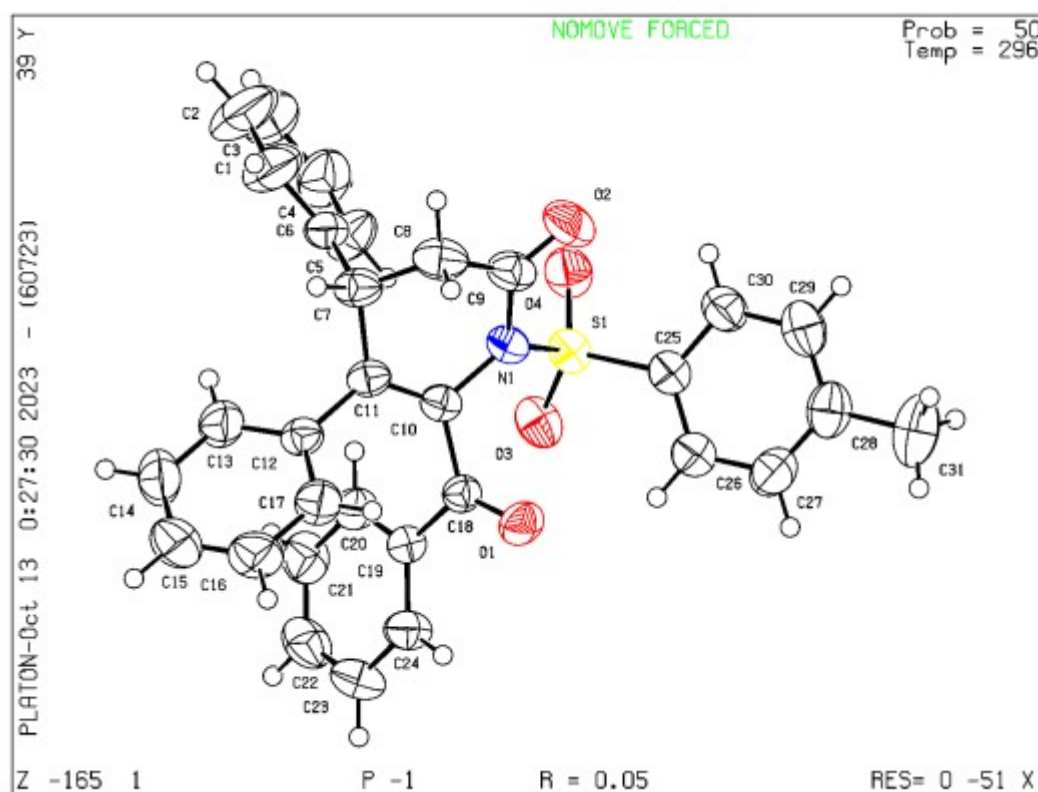

---

Bond precision: C-C = 0.0034 Å

Wavelength=0.71073

Cell: a=8.671(2) b=10.576(2) c=14.370(3)  
alpha=91.730(4) beta=99.279(4) gamma=92.540(3)  
Temperature: 296 K

|                | Calculated     | Reported       |
|----------------|----------------|----------------|
| Volume         | 1298.3(5)      | 1298.3(5)      |
| Space group    | P -1           | P -1           |
| Hall group     | -P 1           | -P 1           |
| Moiety formula | C31 H25 N O4 S | C31 H25 N O4 S |
| Sum formula    | C31 H25 N O4 S | C31 H25 N O4 S |
| Mr             | 507.58         | 507.58         |
| Dx, g cm-3     | 1.298          | 1.298          |
| Z              | 2              | 2              |
| Mu (mm-1)      | 0.162          | 0.162          |
| F000           | 532.0          | 532.0          |
| F000'          | 532.48         |                |
| h,k,lmax       | 11,13,18       | 11,13,18       |
| Nref           | 5934           | 5627           |
| Tmin,Tmax      | 0.959,0.965    | 0.703,0.746    |
| Tmin'          | 0.959          |                |

Correction method= # Reported T Limits: Tmin=0.703 Tmax=0.746  
AbsCorr = ?

Data completeness= 0.948

Theta(max)= 27.447

R(reflections)= 0.0486( 4216)

wR2(reflections)=  
0.1352( 5627)

S = 1.042

Npar= 335
